# Supplementary material for: Lead-free Cs2AgBiBr6 double perovskite microcrystals for effective visible-light photocatalytic thio/selenocyanation
Source: Royal Society of Chemistry journal article supplement (doi:10.1039/d3cc06087j), 2024-01-01
Supplement: d3cc06087j1.pdf [file d3cc06087j1.pdf]

# Lead-free Cs<sub>2</sub>AgBiBr<sub>6</sub> double perovskite microcrystals for effective visible-light photocatalytic thio/selenocyanation

Ting Zhong, Haibo Zhu,\* Yeye Zheng, Gaowen Ren, Xinmei Xie, Qiangwen Fan,\* Zongbo Xie, Zhanggao Le\*

*Jiangxi Province Key Laboratory of Synthetic Chemistry, East China University of Technology, Nanchang, 330013, China*

*\*Corresponding authors: hbzhu@ecut.edu.cn, fanqw2019@ecut.edu.cn, zhgle@ecut.edu.cn*

|                                                                                               |    |
|-----------------------------------------------------------------------------------------------|----|
| <b>1. General</b> .....                                                                       | 2  |
| <b>2. Experimental sections</b> .....                                                         | 2  |
| 2.1 Preparation of Cs <sub>2</sub> AgBiBr <sub>6</sub> .....                                  | 2  |
| 2.2 characterization of CABB .....                                                            | 2  |
| 2.3 Fluorescence Quenching Experiments .....                                                  | 3  |
| 2.4 Optimization of reaction conditions .....                                                 | 4  |
| 2.5 General Procedure for the thiocyanation.....                                              | 5  |
| 2.6 General Procedure for the recycle experiments .....                                       | 5  |
| 2.7 HRMS spectrums of the intermediates.....                                                  | 5  |
| <b>3. Data for the thiocyanation indoles.</b> .....                                           | 7  |
| <b>4. <sup>1</sup>H NMR, <sup>13</sup>CNMR and <sup>19</sup>F NMR for the products.</b> ..... | 19 |
| <b>5. References</b> .....                                                                    | 62 |

## 1. General

All commercial reagents were used directly without further purification, unless otherwise stated. 1,4-dioxane was purchased from J & K chemical, stored over 4 Å molecular sieves and handled under N<sub>2</sub>. DMSO-*d*<sub>6</sub> and CDCl<sub>3</sub> were purchased from Shanghai aladdin Biochemical Technology Co. The following abbreviations were used to describe NMR signals: s = singlet, d = doublet, t = triplet, m = multiplet, dd = doublet of doublets, q = quartet.

## 2. Experimental sections

### 2.1 Preparation of Cs<sub>2</sub>AgBiBr<sub>6</sub>

CABB was synthesized according to previously reported methods with a slight modification,<sup>1</sup> 2.130 g CsBr (10.0 mmol), 0.940 g AgBr (5.0 mmol) and 2.245 g BiBr<sub>3</sub> (5.0 mmol) were added into a 100 ml round bottom flask with 50 mL of 48 % HBr. The mixture was heated to 110 °C for 2 h, then cooled to room temperature. An orange powder precipitated from solution, centrifuged at 8000 rpm for 5 min and dried at 70 °C under reduced pressure for 4 h to obtain the CABB product. The CABB product was dissolved in DMSO giving 50 mM the transparent solution. 1 mL CABB transparent solution was added into 10 mL DCM, then precipitated, centrifuged at 8000 rpm for 5 min and dried at 70 °C under reduced pressure overnight to obtain the CABB nanoparticles.

### 2.2 characterization of CABB

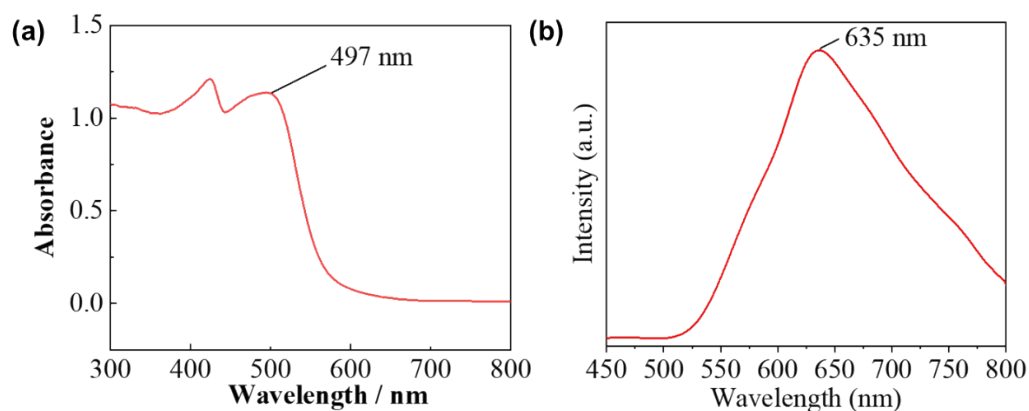

**Figure S1** Absorbance spectrum (a) and Tauc plot of UV-Vis absorption data showing the character of an indirect band gap (b)

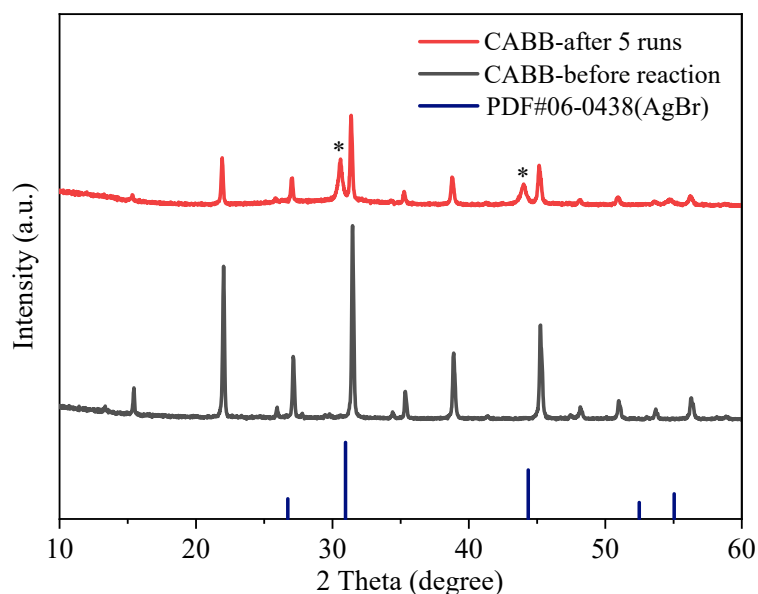

**Figure S2** Powder XRD patterns of CABB before and after reactions.

### 2.3 Fluorescence Quenching Experiments

The fluorescence quenching experiment was conducted using a Perkin Elmer LS55 fluorescence spectrophotometer (USA).

Add CABB powder (1 mg) to 1,4-dioxane (5 mL), 1,4-dioxane of indole ( $10^{-4}$  mol/L, 5 mL) and ammonium thiocyanate ( $10^{-4}$  mol/L, 5 mL), respectively. Prepare a solution of 1,4-dioxane (5 mL) containing CABB (1 mg). Then they were uniformly dispersed by ultrasound.

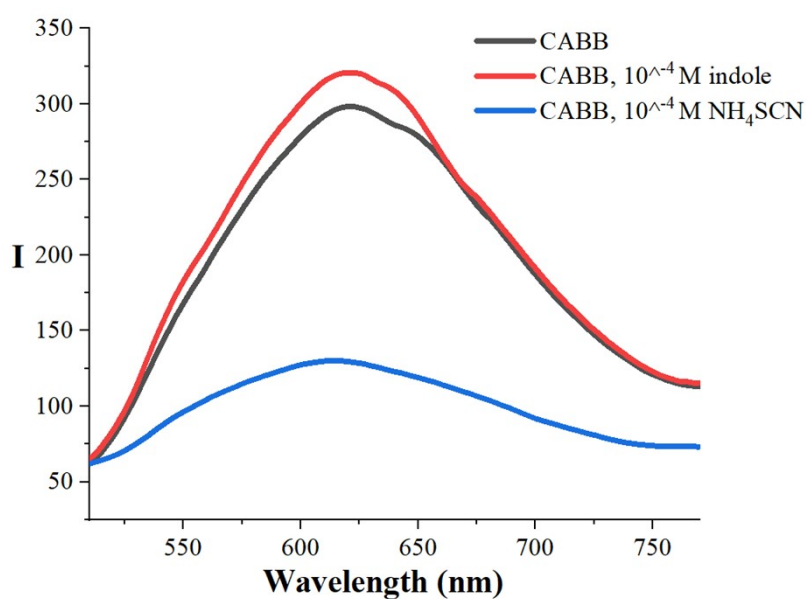

**Figure S3** Fluorescence Quenching Experiments

## 2.4 Optimization of reaction conditions

**Table S1.** Optimization of the reaction conditions<sup>a</sup>

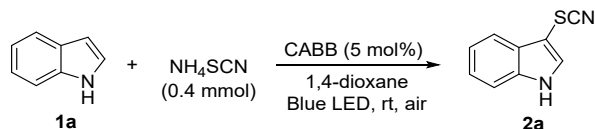

| Entry | Variation from the standard conditions | Yield (%) <sup>b</sup> |
|-------|----------------------------------------|------------------------|
| 1     | none                                   | 97                     |
| 2     | DCE                                    | 48                     |
| 3     | MeCN                                   | 71                     |
| 4     | EtOH                                   | 30                     |
| 5     | EtOAc                                  | 78                     |
| 6     | THF                                    | 76                     |
| 7     | Without CABB                           | 29                     |
| 8     | AgBr instead of CABB                   | 30                     |
| 9     | BiBr <sub>3</sub> instead of CABB      | 36                     |
| 10    | 50 W green LED                         | 32                     |
| 11    | 50 W white LED                         | 36                     |
| 12    | dark                                   | nr                     |
| 13    | N <sub>2</sub> atmosphere              | 6                      |
| 14    | CsPbBr <sub>3</sub> was used           | 82                     |
| 15    | KSCN                                   | 37                     |

<sup>a</sup> Standard reaction conditions: indoles **1a** (0.2 mmol),  $\text{NH}_4\text{SCN}$  (0.4 mmol), CABB (5 mol %), solvent (2 mL), 50 W 457 nm Blue LED, r.t., air, 20 h. <sup>b</sup> Isolated yield.

**Table S2.** Optimization of selenocyanation conditions<sup>a</sup>

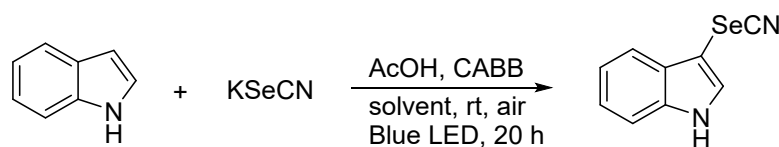

| Entry | KSeCN (equiv) | CABB (mol%) | AcOH (mol%) | Solvent     | Yield (%) <sup>b</sup> |
|-------|---------------|-------------|-------------|-------------|------------------------|
| 1     | 1.2           | /           | /           | 1,4-dioxane | 14                     |
| 2     | 1.2           | 5           | /           | 1,4-dioxane | 47                     |
| 3     | 1.2           | /           | 5           | 1,4-dioxane | 31                     |
| 4     | 1.2           | 5           | 5           | 1,4-dioxane | 68                     |
| 5     | 1.5           | 5           | 5           | 1,4-dioxane | 81                     |
| 6     | 2.0           | 5           | 5           | 1,4-dioxane | 73                     |
| 7     | 1.5           | 5           | 5           | THF         | 78                     |
| 8     | 1.5           | 5           | 5           | DCE         | 32                     |
| 9     | 1.5           | 5           | 5           | MeCN        | 75                     |

---

|    |     |   |   |       |    |
|----|-----|---|---|-------|----|
| 10 | 1.5 | 5 | 5 | EtOAc | 72 |
|----|-----|---|---|-------|----|

---

<sup>a</sup> Reaction conditions: indoles (0.2 mmol), NH<sub>4</sub>SCN (x mmol), CABB (y mol %), AcOH (z mol%), solvent (2 ml), 50 W 457 nm Blue LED, r.t., air, 20 h. <sup>b</sup> Isolated yield.

## 2.5 General Procedure for the thiocyanation

A suspension of indole (0.2 mmol, 1 equiv), NH<sub>4</sub>SCN (0.4 mmol, 2 equiv.) and Cs<sub>2</sub>AgBiBr<sub>6</sub> (10 mg, 5 mol%) in 1,4-dioxane (2 mL) was added to a 10 mL quartz glass tube, and the resulting reaction mixture was stirred under irradiation of a 457 nm Blue LED and an irradiation distance of about 5 cm under air atmosphere at room temperature. After total conversion of the indoles (detected by TLC), the isolated photocatalyst was centrifuged, and the resulting mixture was purified by flash silica gel chromatography (EtOAc/PE = 1/3) to afford the desired products.

## 2.6 General Procedure for the recycle experiments

0.2 mmol indole, 0.4 mmol NH<sub>4</sub>SCN, 20 mg Cs<sub>2</sub>AgBiBr<sub>6</sub> and 1,4-dioxane (2 mL) were added to a 10 ml glass tube and irradiated with a 457 nm Blue LED in air at room temperature for 20 h. Upon completion of the reaction, the organic layer was obtained by decantation operation, and the insoluble residue was washed by ethyl acetate (2×10 mL). The combined organic layer was purified by flash silica gel chromatography (EtOAc/PE = 1/3) to afford the thiocyanation products. The resulted residue was dried under vacuum and was charged again with fresh reagents, repeating the process.

## 2.7 HRMS spectrums of the intermediates

HRMS (ESI) m/z: calcd for C<sub>15</sub>H<sub>11</sub>NS [M + H]<sup>+</sup>: 238.0690, found: 238.0675.

2311198599-1 #26 RT: 0.23 AV: 1 NL: 2.15E5  
T: FTMS + p ESI Full ms [50.0000-750.0000]

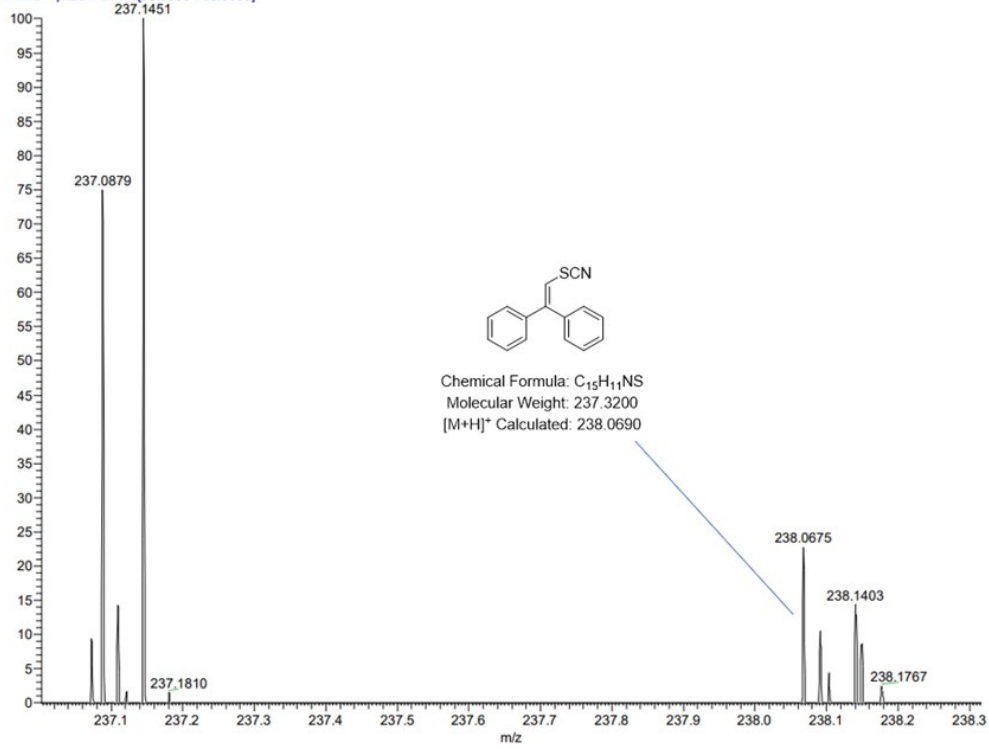

HRMS (ESI) m/z: calcd for C<sub>15</sub>H<sub>13</sub>NOS [M + H]<sup>+</sup>: 256.0796, found: 256.0776.

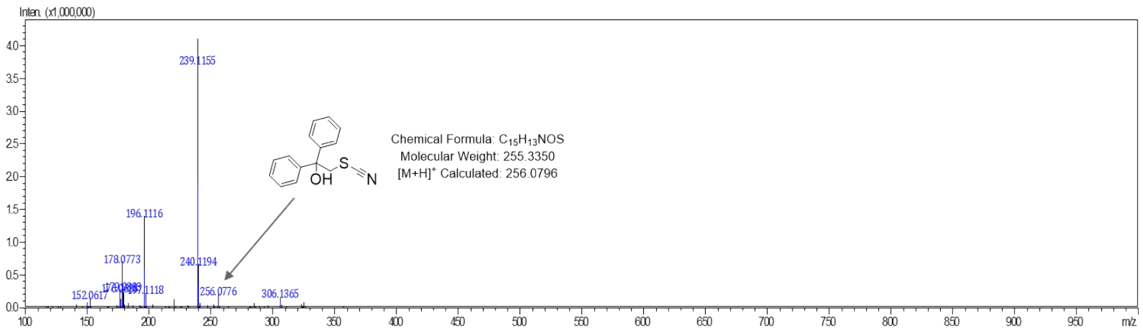

### 3. Data for the thiocyanation indoles.

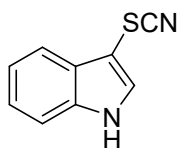

3-thiocyanato-1*H*-indole

**2a<sup>2</sup>**: Flash column chromatography (petroleum/ethyl acetate 3:1) afforded the titled thiocyanation indole as a white solid; mp 72.4-74.1 °C; **<sup>1</sup>H NMR** (500 MHz, CDCl<sub>3</sub>) δ 8.80 (s, 1H), 7.78 (dd, *J* = 6.0, 2.9 Hz, 1H), 7.44 (d, *J* = 2.8 Hz, 1H), 7.40 (dd, *J* = 6.1, 2.7 Hz, 1H), 7.29 (dd, *J* = 6.0, 3.0 Hz, 2H); **<sup>13</sup>C NMR** (126 MHz, CDCl<sub>3</sub>) δ 136.11, 131.30 127.68, 123.83, 121.87, 118.63, 112.43, 112.31, 91.61.

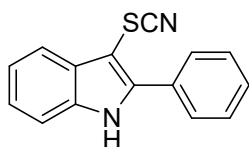

2-phenyl-3-thiocyanato-1*H*-indole

**2b<sup>3</sup>**: Flash column chromatography (petroleum/ethyl acetate 3:1) afforded the titled thiocyanation indole as a white solid; mp 168-170 °C; **<sup>1</sup>H NMR** (500 MHz, DMSO-*d*<sub>6</sub>) δ 12.42 (s, 1H), 7.86 (d, *J* = 7.4 Hz, 2H), 7.73 (d, *J* = 7.2 Hz, 1H), 7.63 (t, *J* = 7.2 Hz, 2H), 7.56 (d, *J* = 7.1 Hz, 2H), 7.37 – 7.26 (m, 2H); **<sup>13</sup>C NMR** (126 MHz, DMSO-*d*<sub>6</sub>) δ 143.63, 136.29, 130.44, 129.80, 129.62, 129.40, 129.30, 123.88, 121.90, 118.51, 112.95, 112.86, 87.60.

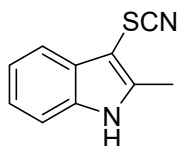

2-methyl-3-thiocyanato-1*H*-indole

**2c<sup>3</sup>**: Flash column chromatography (petroleum/ethyl acetate 3:1) afforded the titled thiocyanation indole as a white solid; mp 97.0-98.8 °C; **<sup>1</sup>H NMR** (500 MHz, CDCl<sub>3</sub>) δ 8.58 (s, 1H), 7.66 (d, *J* = 7.6 Hz, 1H), 7.28 (d, *J* = 6.9 Hz, 1H), 7.26 – 7.17 (m, 2H), 2.47 (s, 3H); **<sup>13</sup>C NMR** (126 MHz, CDCl<sub>3</sub>) δ 142.11, 135.14, 128.72, 123.00, 121.58, 118.09, 112.19, 111.28, 88.85, 12.09.

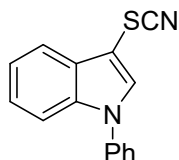

1-phenyl-3-thiocyanato-1*H*-indole

**2d<sup>2</sup>**: Flash column chromatography (petroleum/ethyl acetate 3:1) afforded the titled thiocyanation indole as a yellow oil; **<sup>1</sup>H NMR** (500 MHz, DMSO-*d*<sub>6</sub>) δ 8.36 (s, 1H), 7.80 (dd, *J* = 5.0, 3.8 Hz, 1H), 7.67 – 7.58 (m, 5H), 7.54 – 7.47 (m, 1H), 7.42 – 7.36 (m, 2H); **<sup>13</sup>C NMR** (126 MHz, DMSO-*d*<sub>6</sub>) δ 138.12, 136.32, 135.80, 130.45, 128.66, 128.28, 125.01, 124.62, 122.76, 119.00, 112.35, 112.07, 92.98.

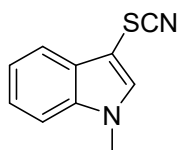

1-methyl-3-thiocyanato-1*H*-indole

**2e<sup>2</sup>**: Flash column chromatography (petroleum/ethyl acetate 3:1) afforded the titled thiocyanation indole as a white solid; mp 77-79 °C; **<sup>1</sup>H NMR** (500 MHz, CDCl<sub>3</sub>) δ 7.77 (d, *J* = 7.7 Hz, 1H), 7.34 (d, *J* = 3.2 Hz, 3H), 7.29 (dd, *J* = 11.7, 4.2 Hz, 1H), 3.74 (s, 3H); **<sup>13</sup>C NMR** (126 MHz, CDCl<sub>3</sub>) δ 137.20, 135.16, 128.51, 123.47, 121.64, 118.95, 112.01, 110.29, 89.78, 33.47.

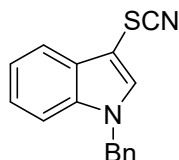

1-benzyl-3-thiocyanato-1*H*-indole

**2f<sup>2</sup>**: Flash column chromatography (petroleum/ethyl acetate 3:1) afforded the titled thiocyanation indole as a white solid; mp 84.6-86.2 °C; **<sup>1</sup>H NMR** (500 MHz, DMSO-*d*<sub>6</sub>) δ 8.22 (s, 1H), 7.70 (dd, *J* = 6.2, 2.7 Hz, 1H), 7.64 (dd, *J* = 6.3, 2.4 Hz, 1H), 7.38 – 7.21 (m, 7H), 5.50 (s, 2H); **<sup>13</sup>C NMR** (126 MHz, DMSO-*d*<sub>6</sub>) δ 137.56, 136.69, 136.47, 129.17, 128.45, 128.21, 127.80, 123.61, 121.93, 118.61, 112.70, 112.14, 89.74, 50.16.

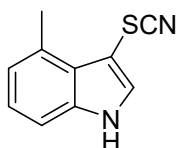

4-methyl-3-thiocyanato-1*H*-indole



**2g<sup>3</sup>**: Flash column chromatography (petroleum/ethyl acetate 3:1) afforded the titled thiocyanation indole as a white solid; mp 125.9-126.5 °C; **<sup>1</sup>H NMR** (500 MHz, CDCl<sub>3</sub>) δ 8.74 (s, 1H), 7.44 (d, *J* = 2.6 Hz, 1H), 7.22 (d, *J* = 8.5 Hz, 1H), 7.15 (t, *J* = 7.7 Hz, 1H), 6.98 (d, *J* = 7.0 Hz, 1H), 2.92 (s, 3H); **<sup>13</sup>C NMR** (126 MHz, CDCl<sub>3</sub>) δ 136.50, 132.25, 131.01, 125.58, 123.96, 123.51, 113.57, 110.14, 91.92, 19.25.

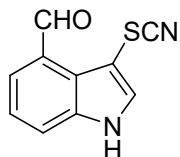

3-thiocyanato-1*H*-indole-4-carbaldehyde

**2h**: Flash column chromatography (petroleum/ethyl acetate 3:1) afforded the titled thiocyanation indole as a white solid; mp 169-171 °C; **<sup>1</sup>H NMR** (500 MHz, DMSO-*d*<sub>6</sub>) δ 12.50 (s, 1H), 10.81 (s, 1H), 8.17 (d, *J* = 2.8 Hz, 1H), 7.89 (d, *J* = 8.1 Hz, 1H), 7.83 (d, *J* = 7.4 Hz, 1H), 7.45 (t, *J* = 7.7 Hz, 1H); **<sup>13</sup>C NMR** (126 MHz, DMSO-*d*<sub>6</sub>) δ 191.56, 138.52, 135.93, 129.01, 125.40, 125.04, 122.96, 119.92, 113.53, 91.11.

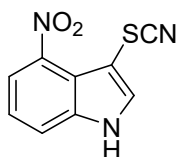

4-nitro-3-thiocyanato-1*H*-indole

**2j**: Flash column chromatography (petroleum/ethyl acetate 3:1) afforded the titled thiocyanation indole as a yellow solid; mp 156-158 °C; **<sup>1</sup>H NMR** (500 MHz, DMSO-*d*<sub>6</sub>) δ 12.82 (s, 1H), 8.29 (s, 1H), 7.97 (dd, *J* = 16.0, 8.0 Hz, 2H), 7.44 (t, *J* = 8.0 Hz, 1H); **<sup>13</sup>C NMR** (126 MHz, DMSO-*d*<sub>6</sub>) δ 141.36, 139.48, 137.56, 122.67, 120.08, 119.04, 118.71, 113.46, 91.07.

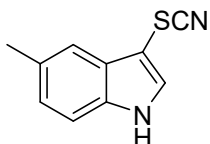

5-methyl-3-thiocyanato-1*H*-indole

**2k<sup>3</sup>**: Flash column chromatography (petroleum/ethyl acetate 3:1) afforded the titled thiocyanation indole as a white solid; mp 93.1-94.5 °C; **<sup>1</sup>H NMR** (500 MHz, CDCl<sub>3</sub>) δ 8.70 (s, 1H), 7.56 (s, 1H), 7.39 (dt, *J* = 5.4, 2.8 Hz, 1H), 7.28 (dd, *J* = 8.3, 2.3 Hz, 1H), 7.11 (d, *J* = 8.3 Hz, 1H), 2.54 – 2.44 (m, 3H); **<sup>13</sup>C NMR** (126 MHz, CDCl<sub>3</sub>) δ 134.38, 131.52, 131.19, 127.93, 125.52, 118.21, 112.46, 111.91, 91.03, 21.59.

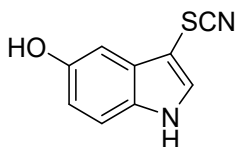

3-thiocyanato-1*H*-indol-5-ol

**2l**: Flash column chromatography (petroleum/ethyl acetate 3:1) afforded the titled thiocyanation indole as a white solid; 128-130 °C; **<sup>1</sup>H NMR** (500 MHz, DMSO-*d*<sub>6</sub>) δ 11.74 (s, 1H), 9.17 (s, 1H), 7.85 (d, *J* = 2.6 Hz, 1H), 7.32 (d, *J* = 8.7 Hz, 1H), 6.95 (s, 1H), 6.86 – 6.66 (m, 1H); **<sup>13</sup>C NMR** (126 MHz, DMSO-*d*<sub>6</sub>) δ 152.92, 133.55, 130.90, 128.97, 113.91, 113.71, 112.84, 101.85, 88.12.

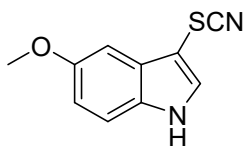

5-methoxy-3-thiocyanato-1*H*-indole

**2m**<sup>3</sup>: Flash column chromatography (petroleum/ethyl acetate 3:1) afforded the titled thiocyanation indole as a white solid; mp 119.8-120.7 °C; **<sup>1</sup>H NMR** (500 MHz, CDCl<sub>3</sub>) δ 8.79 (s, 1H), 7.42 (d, *J* = 2.7 Hz, 1H), 7.27 (d, *J* = 8.9 Hz, 1H), 7.17 (d, *J* = 1.9 Hz, 1H), 6.93 (dd, *J* = 8.8 Hz, 1H), 3.90 (s, 3H); **<sup>13</sup>C NMR** (126 MHz, CDCl<sub>3</sub>) δ 155.70, 131.62, 130.92, 128.53, 114.45, 113.17, 112.32, 99.78, 91.14, 55.90.

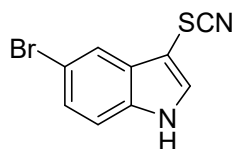

5-bromo-3-thiocyanato-1*H*-indole

**2n**<sup>3</sup> Flash column chromatography (petroleum/ethyl acetate 3:1) afforded the titled thiocyanation indole as a white solid; mp 131-133 °C; **<sup>1</sup>H NMR** (500 MHz, CDCl<sub>3</sub>) δ 8.87 (s, 1H), 7.90 (s, 1H), 7.50 (d, *J* = 2.4 Hz, 1H), 7.37 (d, *J* = 8.6 Hz, 1H), 7.33 – 7.21 (m, 1H); **<sup>13</sup>C NMR** (126 MHz, CDCl<sub>3</sub>) δ 134.68, 132.12, 129.41, 127.07, 121.49, 115.47, 113.61, 111.53, 92.15.

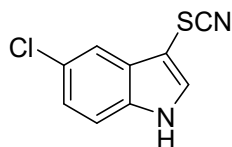

5-chloro-3-thiocyanato-1*H*-indole

**2o**<sup>3</sup>: Flash column chromatography (petroleum/ethyl acetate 3:1) afforded the titled thiocyanation indole as a white solid; mp 130.3-131.9 °C; **<sup>1</sup>H NMR** (500 MHz, CDCl<sub>3</sub>)

$\delta$  8.87 (s, 1H), 7.75 (d,  $J = 1.7$  Hz, 1H), 7.52 (d,  $J = 2.7$  Hz, 1H), 7.33 (d,  $J = 8.7$  Hz, 1H), 7.29 – 7.19 (m, 1H);  $^{13}\text{C}$  NMR (126 MHz,  $\text{CDCl}_3$ )  $\delta$  134.38, 132.31, 128.85, 127.99, 124.49, 118.38, 113.26, 111.62, 92.17.

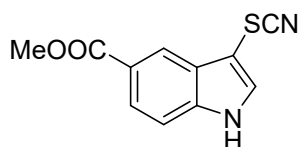

methyl 3-thiocyanato-1*H*-indole-5-carboxylate

**2p**<sup>6</sup>: Flash column chromatography (petroleum/ethyl acetate 3:1) afforded the titled thiocyanation indole as a white solid; mp 155.4-157.6 °C;  $^1\text{H}$  NMR (500 MHz,  $\text{DMSO-}d_6$ )  $\delta$  12.38 (s, 1H), 8.33 (s, 1H), 8.17 (d,  $J = 2.7$  Hz, 1H), 7.90 (dd,  $J = 8.6, 1.4$  Hz, 1H), 7.65 (d,  $J = 8.6$  Hz, 1H), 3.91 (s, 3H);  $^{13}\text{C}$  NMR (126 MHz,  $\text{DMSO-}d_6$ )  $\delta$  167.15, 139.45, 135.65, 127.53, 124.19, 123.03, 120.34, 113.52, 112.63, 91.95, 52.51.

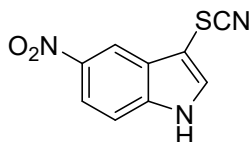

5-nitro-3-thiocyanato-1*H*-indole

**2q**: Flash column chromatography (petroleum/ethyl acetate 3:1) afforded the titled thiocyanation indole as a yellow solid; mp 207-209 °C  $^1\text{H}$  NMR (500 MHz,  $\text{DMSO-}d_6$ )  $\delta$  12.72 (s, 1H), 8.56 (d,  $J = 1.8$  Hz, 1H), 8.31 (d,  $J = 2.6$  Hz, 1H), 8.16 (dd,  $J = 9.0, 2.1$  Hz, 1H), 7.74 (d,  $J = 9.0$  Hz, 1H);  $^{13}\text{C}$  NMR (126 MHz,  $\text{DMSO-}d_6$ )  $\delta$  142.62, 140.02, 137.60, 127.38, 118.66, 114.90, 114.22, 112.48, 93.65.

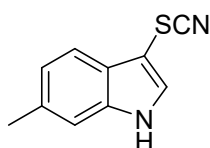

6-methyl-3-thiocyanato-1*H*-indole

**2r**<sup>3</sup>: Flash column chromatography (petroleum/ethyl acetate 3:1) afforded the titled thiocyanation indole as a white solid; mp 104.6-106.2 °C;  $^1\text{H}$  NMR (500 MHz,  $\text{DMSO-}d_6$ )  $\delta$  11.88 (s, 1H), 7.90 (d,  $J = 2.5$  Hz, 1H), 7.55 (d,  $J = 8.0$  Hz, 1H), 7.32 (s, 1H), 7.08 (d,  $J = 8.0$  Hz, 1H), 2.43 (s, 3H);  $^{13}\text{C}$  NMR (126 MHz,  $\text{DMSO-}d_6$ )  $\delta$  137.21, 132.98, 132.76, 125.79, 123.29, 117.88, 112.94, 112.80, 89.46, 21.74.

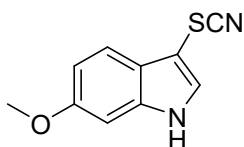

6-methoxy-3-thiocyanato-1*H*-indole

**2s<sup>3</sup>**: Flash column chromatography (petroleum/ethyl acetate 3:1) afforded the titled thiocyanation indole as a white solid; mp 114.5-115.6 °C; **<sup>1</sup>H NMR** (500 MHz, CDCl<sub>3</sub>) δ 11.81 (s, 1H), 7.85 (s, 1H), 7.54 (s, 1H), 6.96 (d, *J* = 56.0 Hz, 2H), 3.81 (s, 3H); **<sup>13</sup>C NMR** (126 MHz, CDCl<sub>3</sub>) δ 157.13, 137.67, 132.32, 121.93, 118.90, 112.83, 111.92, 95.93, 89.67, 55.76.

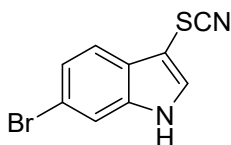

6-bromo-3-thiocyanato-1*H*-indole

**2t<sup>3</sup>**: Flash column chromatography (petroleum/ethyl acetate 3:1) afforded the titled thiocyanation indole as a white solid; mp 132.8-134.0 °C; **<sup>1</sup>H NMR** (500 MHz, DMSO-*d*<sub>6</sub>) δ 12.15 (s, 1H), 8.04 (d, *J* = 2.8 Hz, 1H), 7.75 (d, *J* = 1.1 Hz, 1H), 7.63 (d, *J* = 8.5 Hz, 1H), 7.40 (dd, *J* = 8.5, 1.5 Hz, 1H); **<sup>13</sup>C NMR** (126 MHz, DMSO-*d*<sub>6</sub>) δ 137.62, 134.66, 126.96, 124.52, 120.05, 116.09, 115.87, 112.59, 90.69.

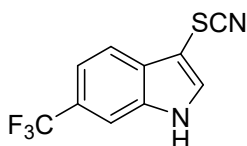

3-thiocyanato-6-(trifluoromethyl)-1*H*-indole

**2u<sup>4</sup>**: Flash column chromatography (petroleum/ethyl acetate 3:1) afforded the titled thiocyanation indole as a yellow solid; mp 84.1-86.4 °C; **<sup>1</sup>H NMR** (500 MHz, DMSO-*d*<sub>6</sub>) δ 12.45 (s, 1H), 8.27 (d, *J* = 2.6 Hz, 1H), 7.89 (d, *J* = 8.9 Hz, 2H), 7.57 (d, *J* = 8.3 Hz, 1H); **<sup>13</sup>C NMR** (126 MHz, DMSO-*d*<sub>6</sub>) δ 136.82 (s), 135.69 (s), 130.50 (s), 126.52 (s), 124.43 – 123.71 (m), 119.32 (s), 117.87 (d, *J* = 3.4 Hz), 112.55 (s), 110.78 (d, *J* = 4.4 Hz), 91.13 (s). **<sup>19</sup>F NMR** (DMSO-*d*<sub>6</sub>, 376 MHz, 298 K) δ = -59.23 (s).

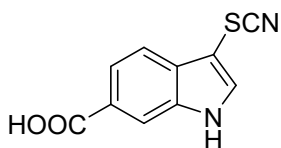

3-thiocyanato-1*H*-indole-6-carboxylic acid

**2v**: Flash column chromatography (petroleum/ethyl acetate 3:1) afforded the titled

thiocyanation indole as a white solid; mp 262-264 °C;  $^1\text{H NMR}$  (500 MHz,  $\text{DMSO-}d_6$ )  $\delta$  12.87 (s, 1H), 12.37 (s, 1H), 8.20 (d,  $J = 26.2$  Hz, 2H), 7.82 (d,  $J = 49.4$  Hz, 2H);  $^{13}\text{C NMR}$  (126 MHz,  $\text{DMSO-}d_6$ )  $\delta$  168.25, 136.71, 136.19, 131.21, 125.76, 122.38, 118.06, 115.19, 112.64, 90.79.

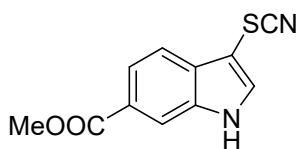

methyl 3-thiocyanato-1*H*-indole-6-carboxylate

**2w**<sup>6</sup>: Flash column chromatography (petroleum/ethyl acetate 3:1) afforded the titled thiocyanation indole as a brown solid; mp 135.3-137.2 °C;  $^1\text{H NMR}$  (500 MHz,  $\text{DMSO-}d_6$ )  $\delta$  12.40 (s, 1H), 8.25 (s, 1H), 8.18 (s, 1H), 7.87 (d,  $J = 8.1$  Hz, 1H), 7.78 (d,  $J = 8.2$  Hz, 1H), 3.90 (s, 3H);  $^{13}\text{C NMR}$  (126 MHz,  $\text{DMSO-}d_6$ )  $\delta$  167.15, 137.04, 136.13, 131.47, 124.54, 122.08, 118.29, 115.10, 112.61, 90.98, 52.56.

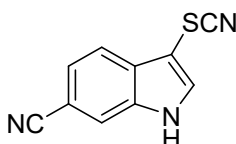

3-thiocyanato-1*H*-indole-6-carbonitrile

**2x**<sup>3</sup>: Flash column chromatography (petroleum/ethyl acetate 3:1) afforded the titled thiocyanation indole as a white solid; mp 111-113 °C;  $^1\text{H NMR}$  (500 MHz,  $\text{DMSO-}d_6$ )  $\delta$  12.59 (s, 1H), 8.29 (d,  $J = 3.6$  Hz, 1H), 8.07 (d,  $J = 5.5$  Hz, 1H), 7.89 – 7.80 (m, 1H), 7.60 (dd,  $J = 7.3, 6.1$  Hz, 1H);  $^{13}\text{C NMR}$  (126 MHz,  $\text{DMSO-}d_6$ )  $\delta$  137.61, 135.67, 131.07, 124.30, 120.32, 119.50, 118.37, 112.50, 105.11, 91.80.

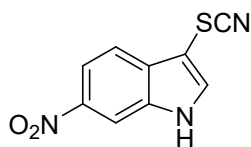

6-nitro-3-thiocyanato-1*H*-indole

**2y**<sup>5</sup>: Flash column chromatography (petroleum/ethyl acetate 3:1) afforded the titled thiocyanation indole as a yellow solid; mp 179-180 °C;  $^1\text{H NMR}$  (500 MHz,  $\text{DMSO-}d_6$ )  $\delta$  12.67 (s, 1H), 8.49 – 8.36 (m, 2H), 8.12 (dd,  $J = 8.8, 1.8$  Hz, 1H), 7.87 (d,  $J = 8.8$  Hz, 1H);  $^{13}\text{C NMR}$  (126 MHz,  $\text{DMSO-}d_6$ )  $\delta$  143.76, 139.45, 135.32, 132.63, 118.86, 116.60, 112.43, 110.00, 92.22.

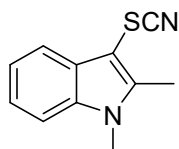

1,2-dimethyl-3-thiocyanato-1*H*-indole

**2z**<sup>6</sup>: Flash column chromatography (petroleum/ethyl acetate 3:1) afforded the titled thiocyanation indole as a yellow solid; mp 74.7-76.4 °C; <sup>1</sup>H NMR (500 MHz, DMSO-*d*<sub>6</sub>) δ 7.58 (dd, *J* = 13.8, 7.7 Hz, 2H), 7.32 – 7.18 (m, 2H), 3.74 (s, 3H), 2.56 (s, 3H); <sup>13</sup>C NMR (126 MHz, DMSO-*d*<sub>6</sub>) δ 144.80, 137.06, 128.00, 122.72, 121.61, 117.68, 112.58, 111.00, 86.82, 30.94, 11.14.

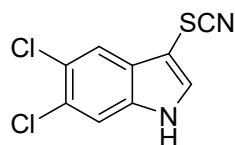

5,6-dichloro-3-thiocyanato-1*H*-indole

**2aa**: Flash column chromatography (petroleum/ethyl acetate 3:1) afforded the titled thiocyanation indole as a brown solid; mp 194.8-196.9 °C; <sup>1</sup>H NMR (500 MHz, DMSO-*d*<sub>6</sub>) δ 12.28 (s, 1H), 8.14 (s, 1H), 7.88 (s, 1H), 7.81 (s, 1H); <sup>13</sup>C NMR (126 MHz, DMSO-*d*<sub>6</sub>) δ 136.37, 135.63, 127.90, 125.96, 124.50, 119.41, 115.03, 112.52, 90.56.

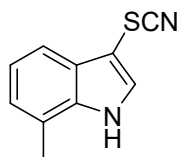

7-methyl-3-thiocyanato-1*H*-indole

**2ab**<sup>3</sup>: Flash column chromatography (petroleum/ethyl acetate 3:1) afforded the titled thiocyanation indole as a white solid; mp 157.2-159.0 °C; <sup>1</sup>H NMR (500 MHz, CDCl<sub>3</sub>) δ 8.70 (s, 1H), 7.63 (d, *J* = 8.0 Hz, 1H), 7.48 (d, *J* = 1.6 Hz, 1H), 7.22 (dd, *J* = 15.1, 7.6 Hz, 1H), 7.10 (d, *J* = 7.1 Hz, 1H), 2.47 (s, 3H); <sup>13</sup>C NMR (126 MHz, CDCl<sub>3</sub>) δ 135.65, 130.77, 127.34, 124.38, 122.08, 121.50, 116.37, 112.37, 92.41, 16.41.

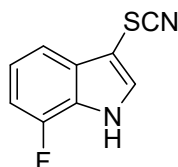

7-fluoro-3-thiocyanato-1*H*-indole

**2ac**: Flash column chromatography (petroleum/ethyl acetate 3:1) afforded the titled thiocyanation indole as a white solid; mp 119-121 °C; <sup>1</sup>H NMR (500 MHz, CDCl<sub>3</sub>) δ

8.99 (s, 1H), 7.54 (dd,  $J = 12.4, 5.3$  Hz, 2H), 7.33 – 7.12 (m, 1H), 7.02 (dd,  $J = 10.9, 8.0$  Hz, 1H);  $^{13}\text{C NMR}$  (126 MHz,  $\text{CDCl}_3$ )  $\delta$  150.53 (s), 148.57 (s), 131.80, 124.61 (d,  $J = 14.3$  Hz), 122.38 (d,  $J = 6.2$  Hz), 114.54 (d,  $J = 3.8$  Hz), 111.69 (s), 108.80 (d,  $J = 15.9$  Hz), 93.34 (d,  $J = 3.4$  Hz);  $^{19}\text{F NMR}$  ( $\text{CDCl}_3$ , 376 MHz, 298 K)  $\delta = -132.06$  (dd,  $J = 11.4, 4.6$  Hz).

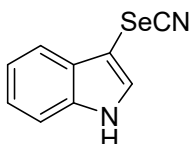

3-selenocyanato-1H-indole

**3a**<sup>4</sup>: Flash column chromatography (petroleum/ethyl acetate 3:1) afforded the titled thiocyanation indole as a brown solid; mp 108-110 °C;  $^1\text{H NMR}$  (500 MHz,  $\text{CDCl}_3$ )  $\delta$  8.83 (s, 1H), 7.74 – 7.65 (m, 1H), 7.34 (dd,  $J = 7.2, 3.9$  Hz, 2H), 7.29 – 7.22 (m, 2H);  $^{13}\text{C NMR}$  (126 MHz,  $\text{CDCl}_3$ )  $\delta$  136.07, 132.13, 128.70, 123.69, 121.79, 119.43, 112.13, 102.63, 88.93.

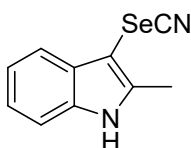

2-methyl-3-selenocyanato-1H-indole

**3b**<sup>8</sup>: Flash column chromatography (petroleum/ethyl acetate 3:1) afforded the titled thiocyanation indole as a brown oil;  $^1\text{H NMR}$  (500 MHz,  $\text{CDCl}_3$ )  $\delta$  11.83 (s, 1H), 7.43 (d,  $J = 37.5$  Hz, 2H), 7.16 (s, 2H), 2.53 (s, 3H);  $^{13}\text{C NMR}$  (126 MHz,  $\text{CDCl}_3$ )  $\delta$  142.69, 136.04, 130.07, 122.31, 120.91, 118.58, 111.95, 104.70, 88.33, 13.20.

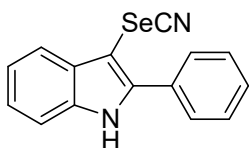

2-phenyl-3-selenocyanato-1H-indole

**3c**<sup>4</sup>: Flash column chromatography (petroleum/ethyl acetate 3:1) afforded the titled thiocyanation indole as a yellow solid; mp 152.8-154.1 °C;  $^1\text{H NMR}$  (500 MHz,  $\text{DMSO}-d_6$ )  $\delta$  12.26 (s, 1H), 7.87 (d,  $J = 7.3$  Hz, 2H), 7.65 (d,  $J = 7.4$  Hz, 1H), 7.60 (t,  $J = 7.6$  Hz, 2H), 7.56 – 7.49 (m, 2H), 7.31 – 7.24 (m, 2H);  $^{13}\text{C NMR}$  (126 MHz,  $\text{DMSO}-d_6$ )  $\delta$  143.23, 136.57, 131.44, 130.93, 129.63, 129.43, 129.14, 123.52, 121.50, 119.70, 112.61, 105.29, 88.68.

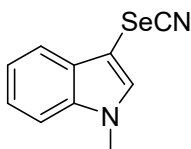

1-methyl-3-selenocyanato-1*H*-indole

**3d**<sup>7</sup>: Flash column chromatography (petroleum/ethyl acetate 3:1) afforded the titled thiocyanation indole as a brown solid; mp 106-107 °C; <sup>1</sup>H NMR (500 MHz, CDCl<sub>3</sub>) δ 7.86 (s, 1H), 7.60 (d, *J* = 7.8 Hz, 1H), 7.56 (d, *J* = 8.1 Hz, 1H), 7.31 (t, *J* = 7.6 Hz, 1H), 7.26 (t, *J* = 7.4 Hz, 1H), 3.84 (s, 3H); <sup>13</sup>C NMR (126 MHz, CDCl<sub>3</sub>) δ 137.29, 137.22, 129.51, 123.03, 121.35, 119.42, 111.25, 104.90, 88.28, 33.41.

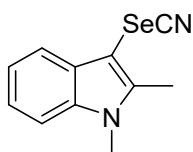

1,2-dimethyl-3-selenocyanato-1*H*-indole

**3e**<sup>7</sup>: Flash column chromatography (petroleum/ethyl acetate 3:1) afforded the titled thiocyanation indole as a yellow solid; mp 123-124 °C; <sup>1</sup>H NMR (500 MHz, DMSO-*d*<sub>6</sub>) δ 7.52 (t, *J* = 8.6 Hz, 2H), 7.21 (dt, *J* = 15.0, 6.9 Hz, 2H), 3.76 (s, 3H), 2.57 (s, 3H); <sup>13</sup>C NMR (126 MHz, DMSO-*d*<sub>6</sub>) δ 143.92, 137.23, 129.25, 122.36, 121.20, 118.79, 110.69, 104.72, 88.23, 30.93, 12.24.

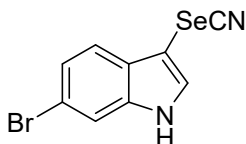

6-bromo-3-selenocyanato-1*H*-indole

**3f**<sup>7</sup>: Flash column chromatography (petroleum/ethyl acetate 3:1) afforded the titled thiocyanation indole as a brown solid; mp 132.2-133.9 °C; <sup>1</sup>H NMR (500 MHz, DMSO-*d*<sub>6</sub>) δ 11.99 (s, 1H), 7.90 (d, *J* = 2.5 Hz, 1H), 7.71 (s, 1H), 7.54 (d, *J* = 8.4 Hz, 1H), 7.36 (dd, *J* = 8.4, 1.0 Hz, 1H); <sup>13</sup>C NMR (126 MHz, DMSO-*d*<sub>6</sub>) δ 137.48, 134.67, 128.25, 124.10, 121.05, 115.71, 115.43, 104.95, 90.35.

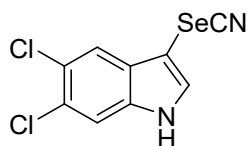

5,6-dichloro-3-selenocyanato-1*H*-indole

**3g**: Flash column chromatography (petroleum/ethyl acetate 3:1) afforded the titled



thiocyanation indole as a brown solid; mp 199.5-201.5 °C;  $^1\text{H NMR}$  (500 MHz,  $\text{DMSO-}d_6$ )  $\delta$  12.13 (s, 1H), 8.00 (d,  $J = 2.6$  Hz, 1H), 7.79 (s, 1H), 7.76 (s, 1H);  $^{13}\text{C NMR}$  (126 MHz,  $\text{DMSO-}d_6$ )  $\delta$  136.33, 135.49, 129.22, 125.48, 123.96, 120.27, 114.62, 105.04, 90.15.

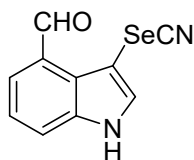

3-selenocyanato-1H-indole-4-carbaldehyde

**3h**: Flash column chromatography (petroleum/ethyl acetate 3:1) afforded the titled thiocyanation indole as a yellow solid; mp 142-144 °C;  $^1\text{H NMR}$  (500 MHz,  $\text{DMSO-}d_6$ )  $\delta$  12.28 (s, 1H), 10.25 (s, 1H), 7.88 (d,  $J = 8.1$  Hz, 1H), 7.83 – 7.73 (m, 2H), 7.41 (s, 1H);  $^{13}\text{C NMR}$  (126 MHz,  $\text{DMSO-}d_6$ )  $\delta$  194.61, 138.63, 131.65, 128.24, 128.06, 123.96, 122.47, 120.50, 106.44, 90.17.

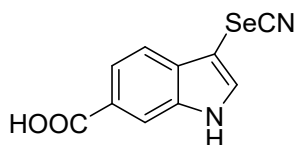

3-selenocyanato-1H-indole-6-carboxylic acid

**3i**: Flash column chromatography (petroleum/ethyl acetate 3:1) afforded the titled thiocyanation indole as a yellow solid; mp 269-271 °C;  $^1\text{H NMR}$  (500 MHz,  $\text{DMSO-}d_6$ )  $\delta$  12.29 (s, 1H), 8.14 (s, 1H), 8.04 (s, 1H), 7.83 (d,  $J = 8.1$  Hz, 1H), 7.62 (d,  $J = 8.2$  Hz, 1H);  $^{13}\text{C NMR}$  (126 MHz,  $\text{DMSO-}d_6$ )  $\delta$  168.95, 136.53, 136.13, 132.15, 126.66, 122.17, 118.78, 114.81, 104.99, 90.22.

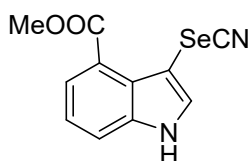

methyl 3-selenocyanato-1H-indole-4-carboxylate

**3j**<sup>4</sup>: Flash column chromatography (petroleum/ethyl acetate 3:1) afforded the titled thiocyanation indole as a yellow oil;  $^1\text{H NMR}$  (500 MHz,  $\text{DMSO-}d_6$ )  $\delta$  12.18 (s, 1H), 7.81 (d,  $J = 8.1$  Hz, 1H), 7.74 (d,  $J = 7.4$  Hz, 1H), 7.71 (d,  $J = 2.1$  Hz, 1H), 7.30 (t,  $J = 7.8$  Hz, 1H), 3.93 (s, 3H);  $^{13}\text{C NMR}$  (126 MHz,  $\text{DMSO-}d_6$ )  $\delta$  168.66, 138.58, 129.89, 125.07, 123.57, 122.05, 120.18, 118.74, 106.81, 90.08, 52.97.

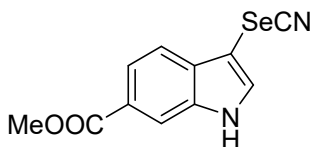

methyl 3-selenocyanato-1*H*-indole-6-carboxylate

**3k<sup>4</sup>**: Flash column chromatography (petroleum/ethyl acetate 3:1) afforded the titled thiocyanation indole as a yellow solid; mp 165.3-167.2 °C; **<sup>1</sup>H NMR** (500 MHz, DMSO-*d*<sub>6</sub>) δ 12.25 (s, 1H), 8.15 (s, 1H), 8.11 (d, *J* = 2.5 Hz, 1H), 7.83 (d, *J* = 8.4 Hz, 1H), 7.69 (d, *J* = 8.3 Hz, 1H), 3.88 (s, 3H); **<sup>13</sup>C NMR** (126 MHz, DMSO-*d*<sub>6</sub>) δ 167.29, 137.13, 135.99, 132.75, 124.09, 121.70, 119.26, 114.76, 105.02, 90.68, 52.51.

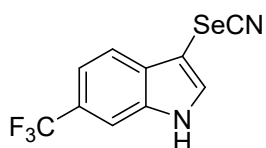

3-selenocyanato-6-(trifluoromethyl)-1*H*-indole

**3l<sup>4</sup>**: Flash column chromatography (petroleum/ethyl acetate 3:1) afforded the titled thiocyanation indole as a yellow solid; mp 101-103 °C; **<sup>1</sup>H NMR** (500 MHz, DMSO-*d*<sub>6</sub>) δ 12.28 (s, 1H), 8.12 (d, *J* = 2.6 Hz, 1H), 7.87 (s, 1H), 7.80 (d, *J* = 8.3 Hz, 1H), 7.52 (d, *J* = 8.3 Hz, 1H); **<sup>13</sup>C NMR** (126 MHz, DMSO-*d*<sub>6</sub>) δ 136.81 (s), 135.56 (s), 131.76 (s), 126.65 (s), 124.58 – 123.29 (m), 120.25 (s), 117.44 (d, *J* = 3.4 Hz), 110.37 (d, *J* = 4.4 Hz), 104.94 (s), 90.73 (s); **<sup>19</sup>F NMR** (DMSO-*d*<sub>6</sub>, 376 MHz, 298 K) δ = -59.10 (s).

4.  $^1\text{H}$  NMR,  $^{13}\text{C}$  NMR and  $^{19}\text{F}$  NMR for the products.

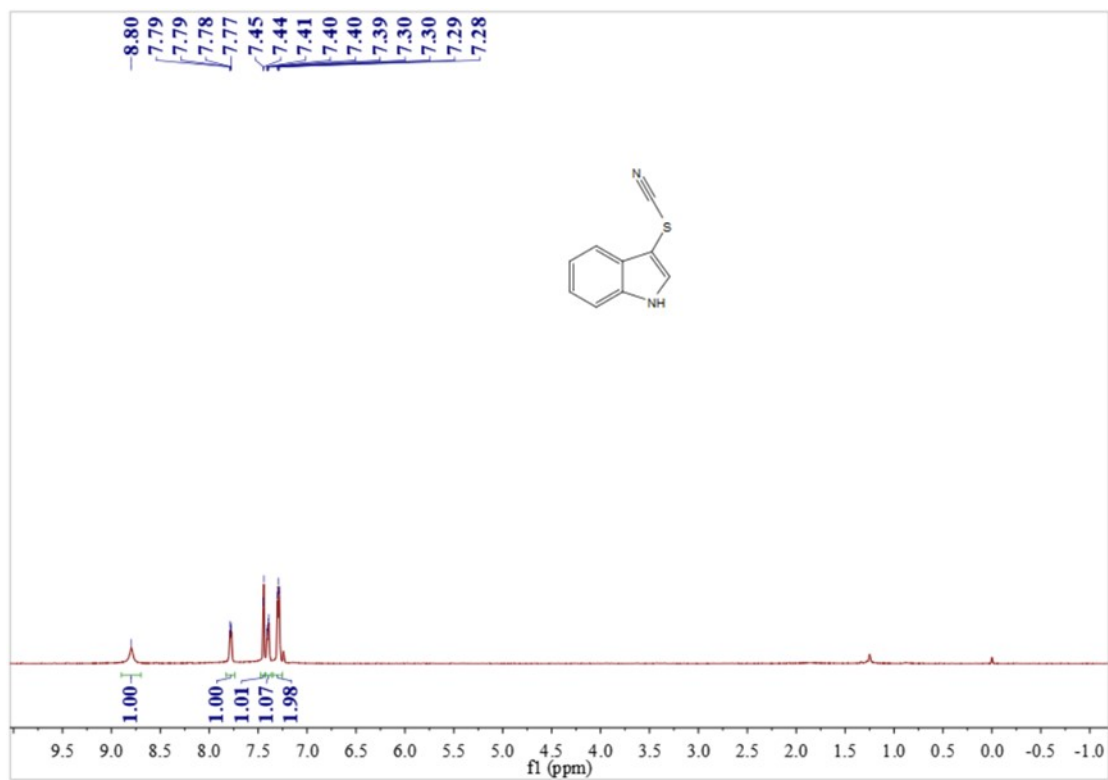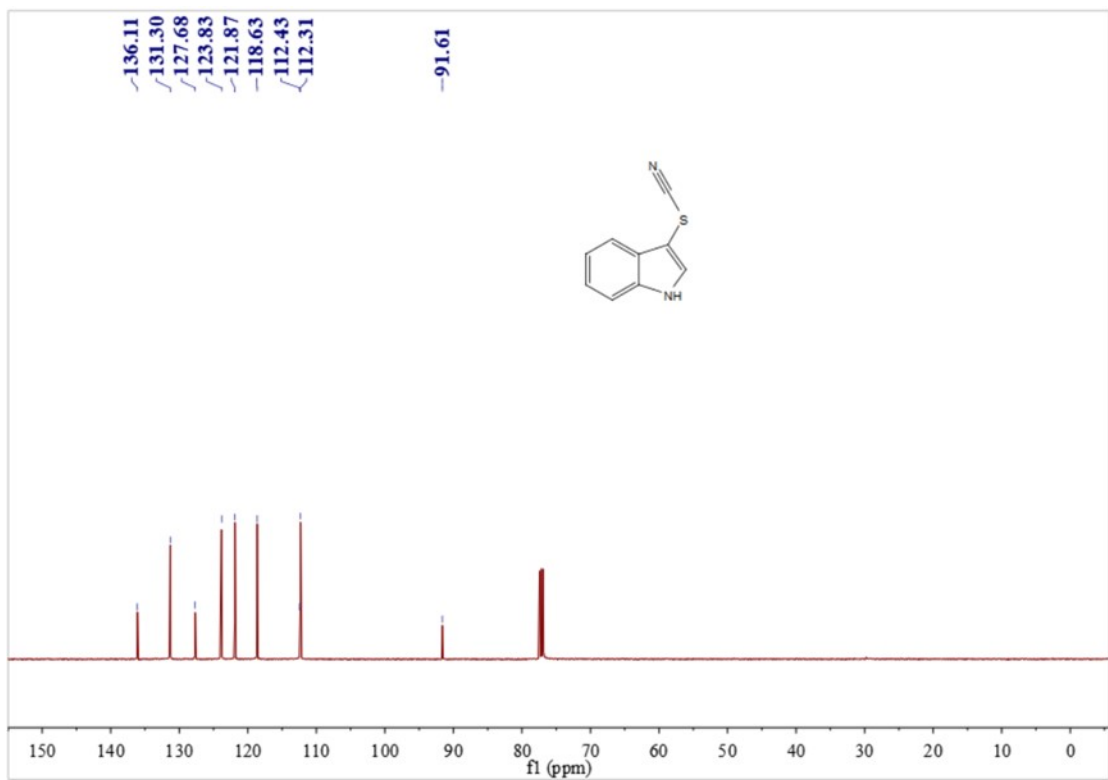

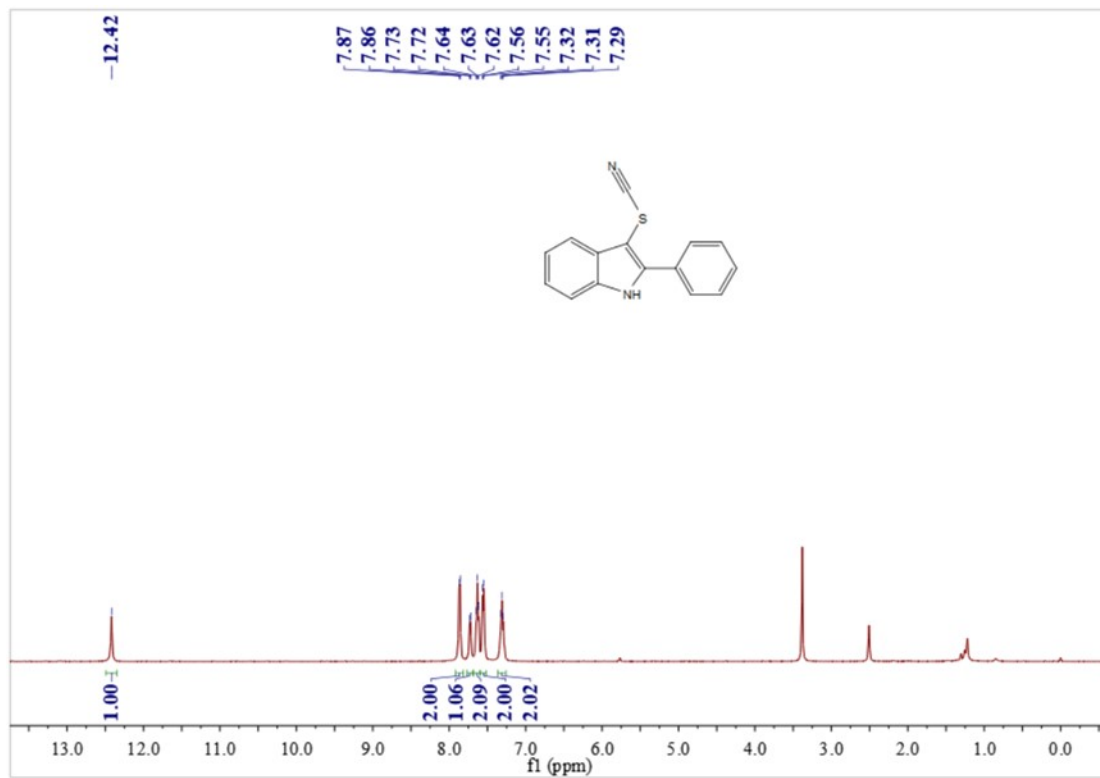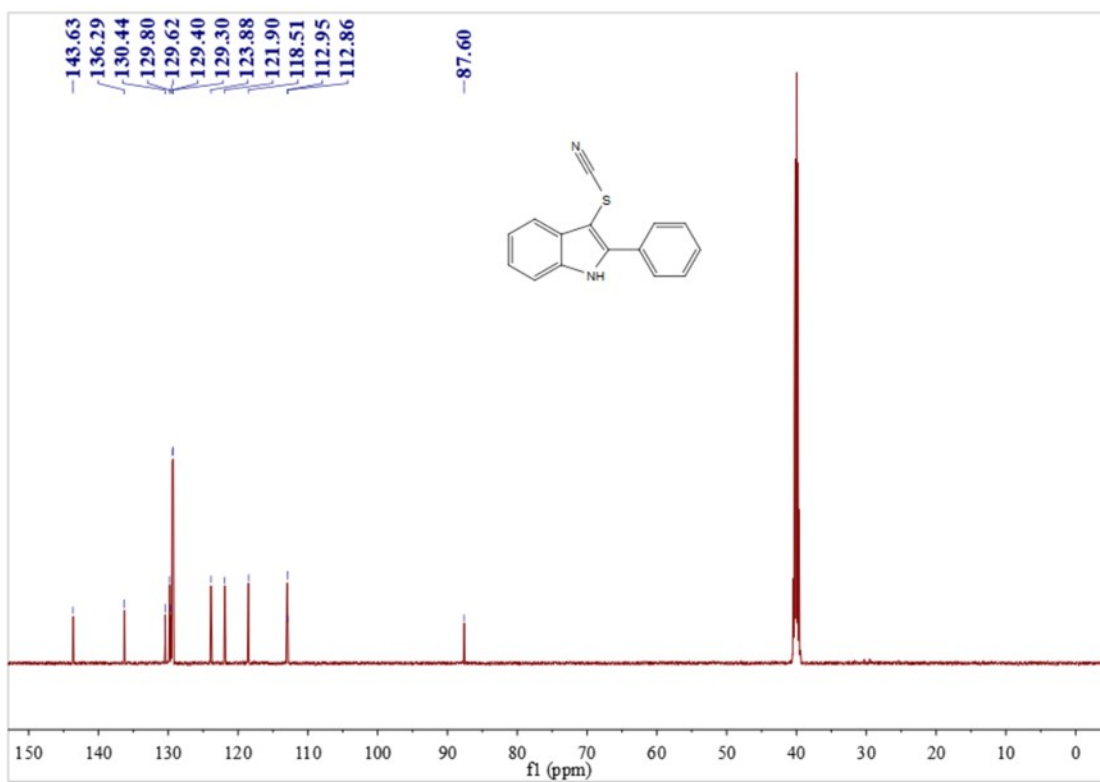

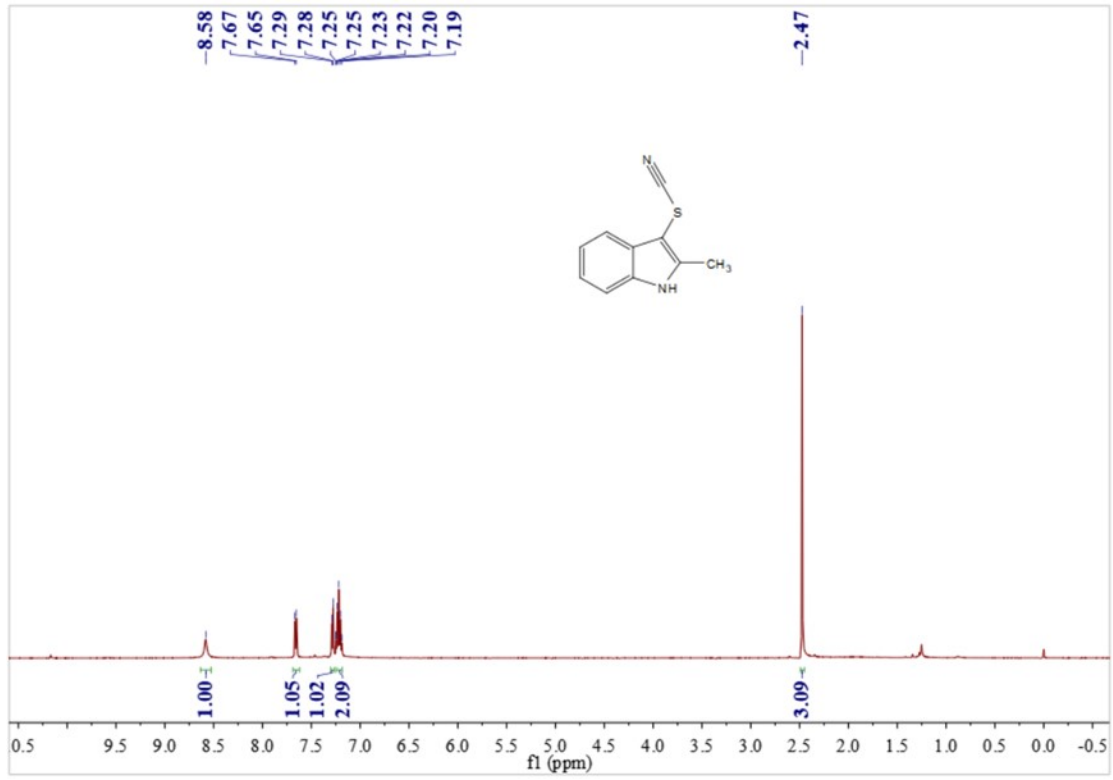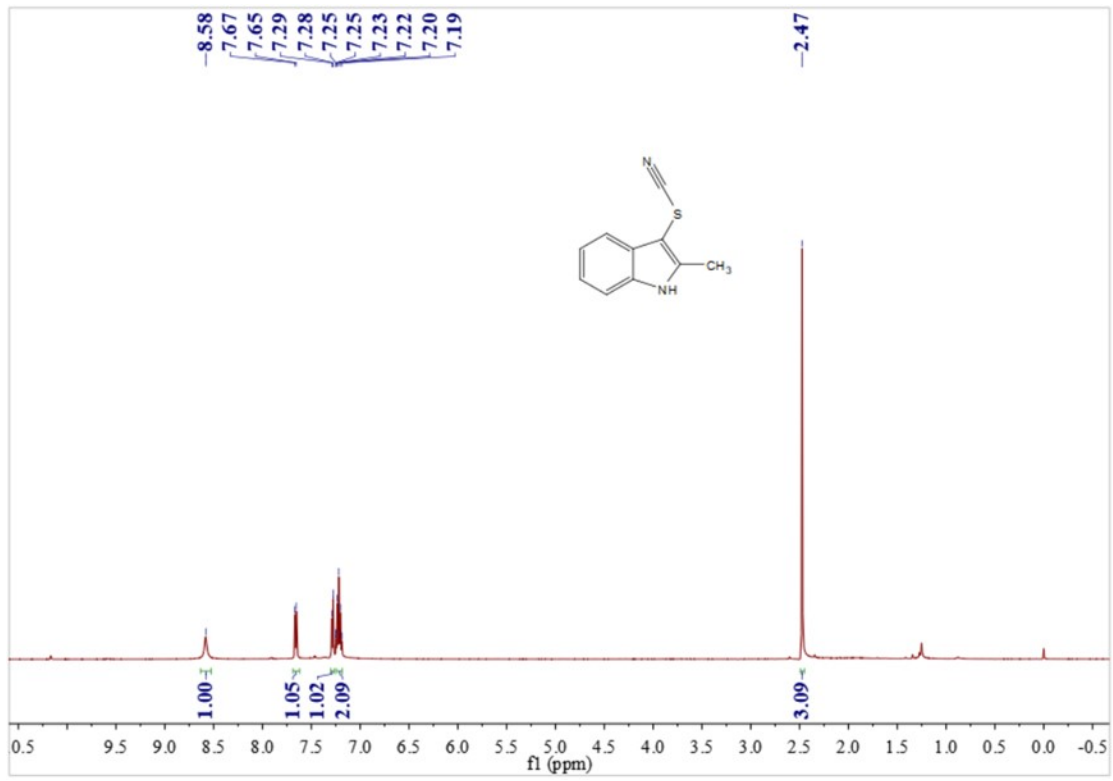

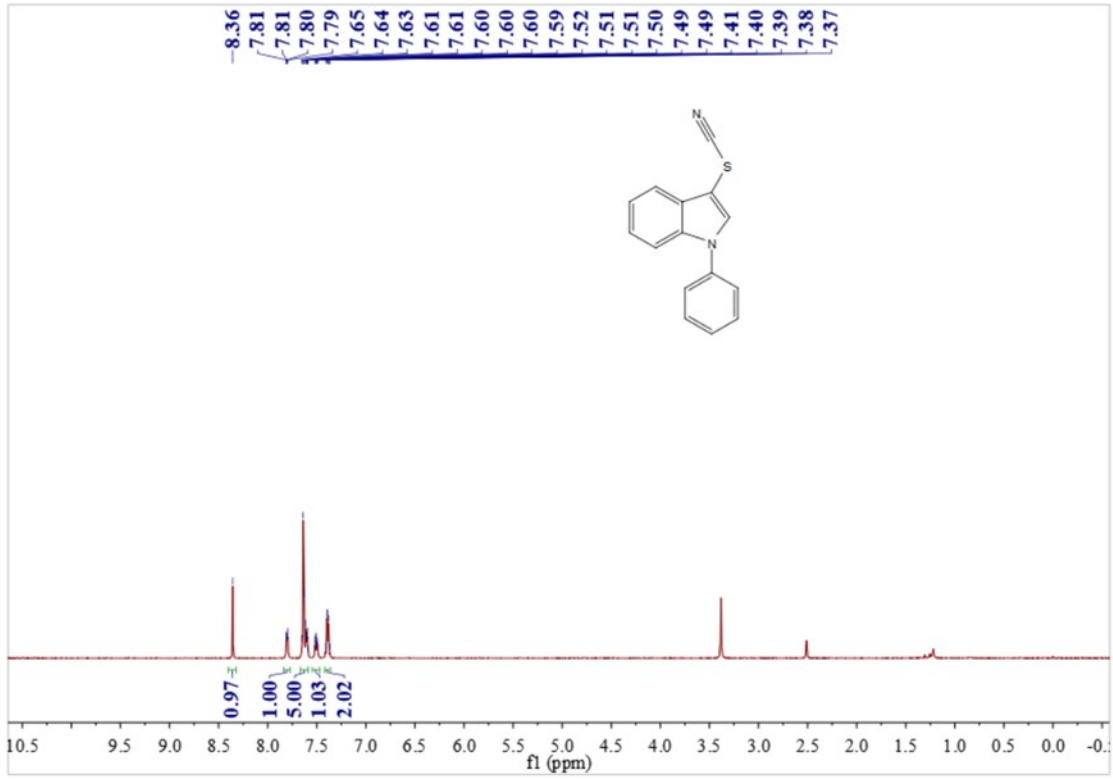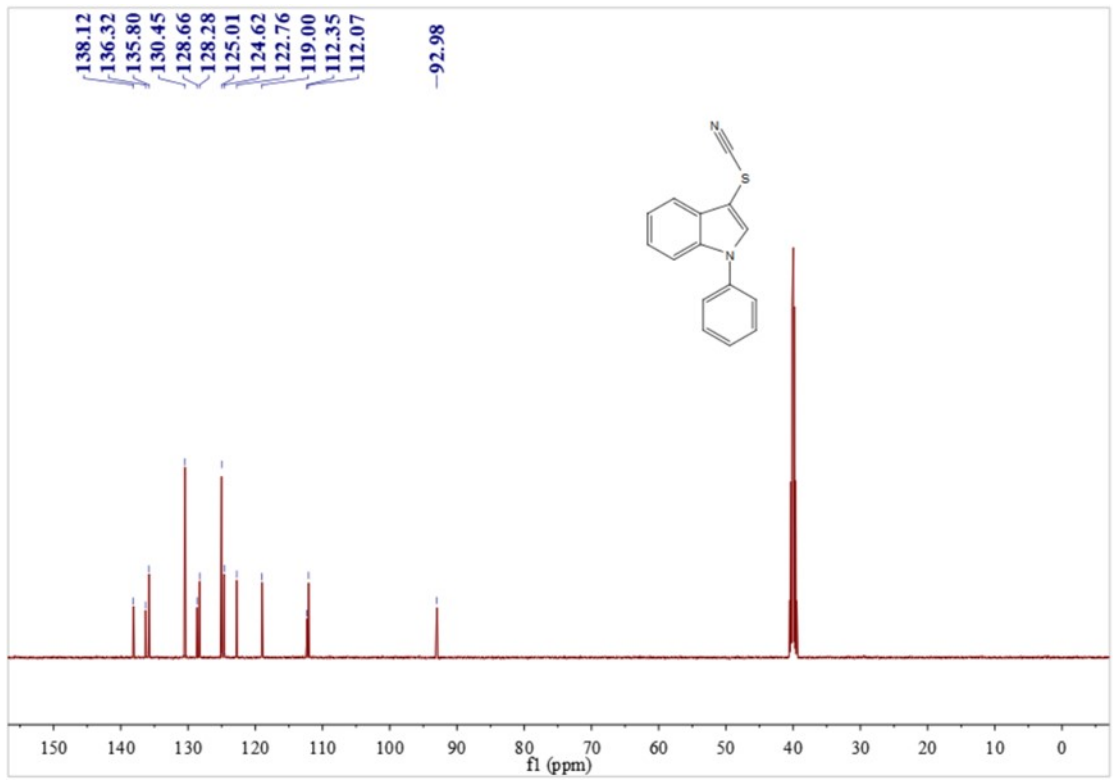

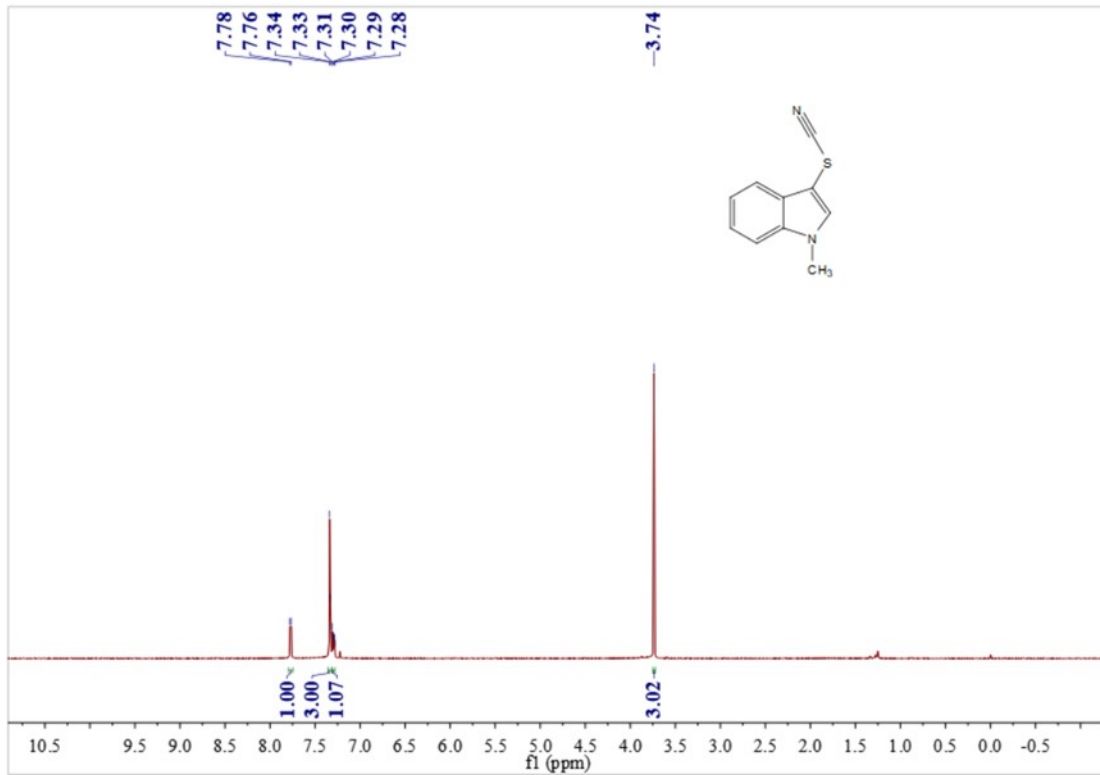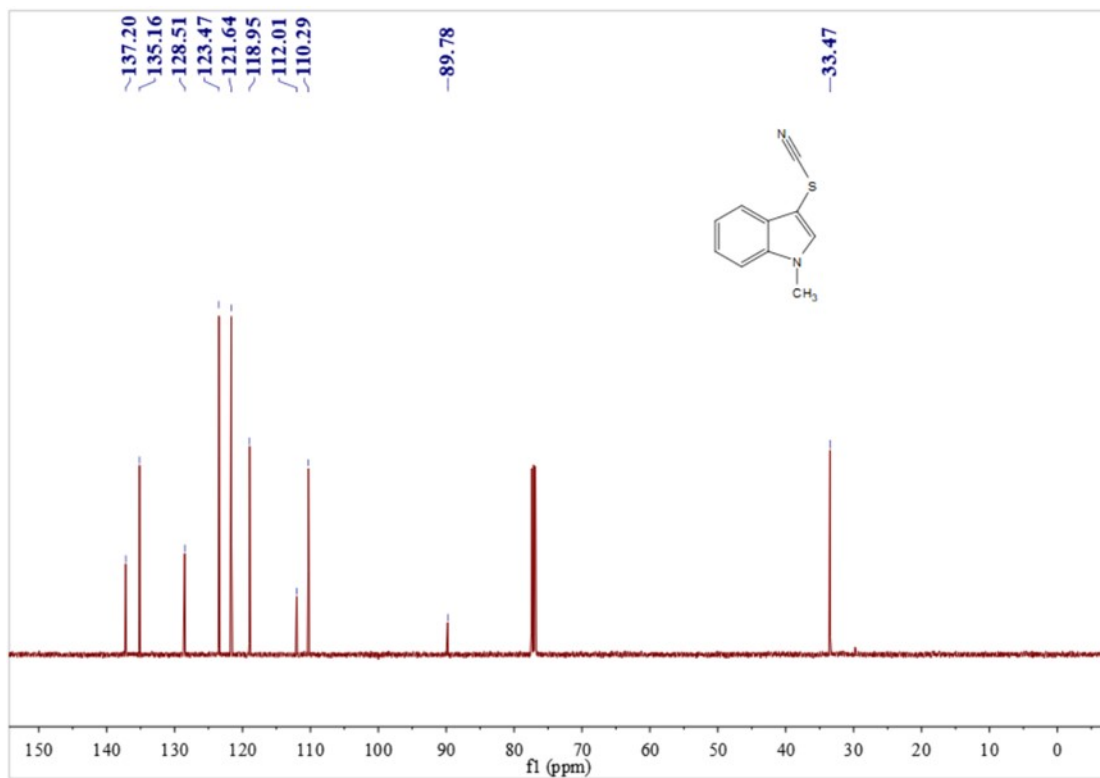

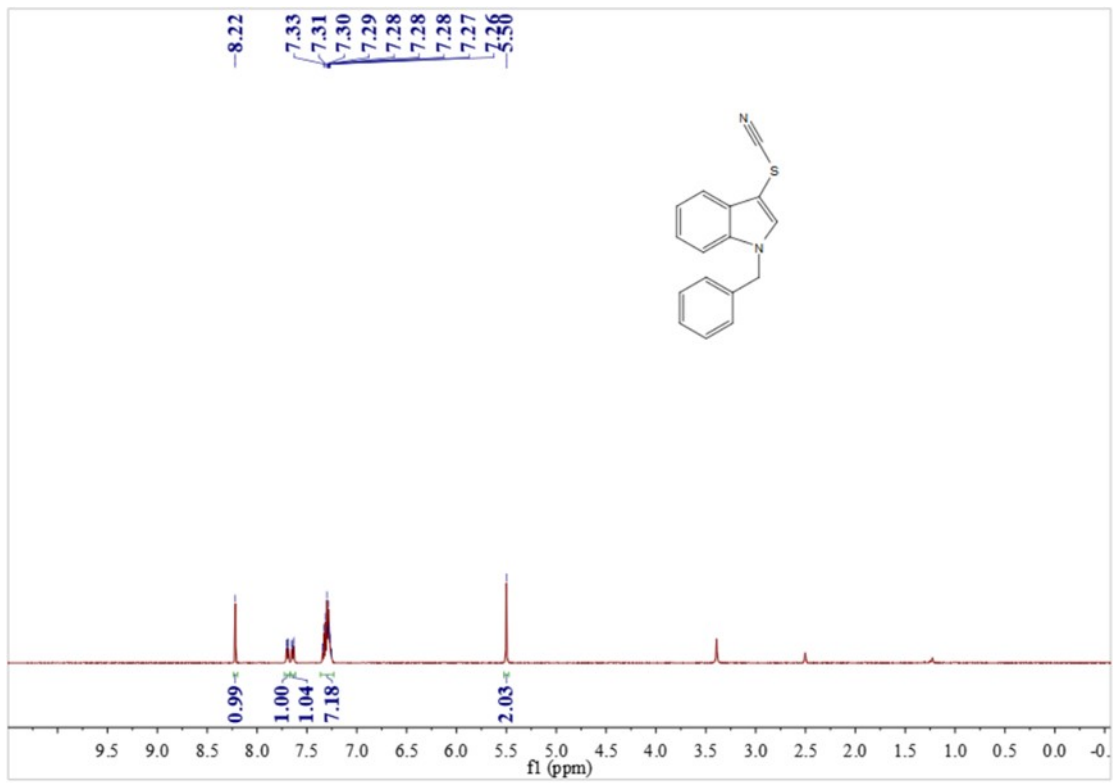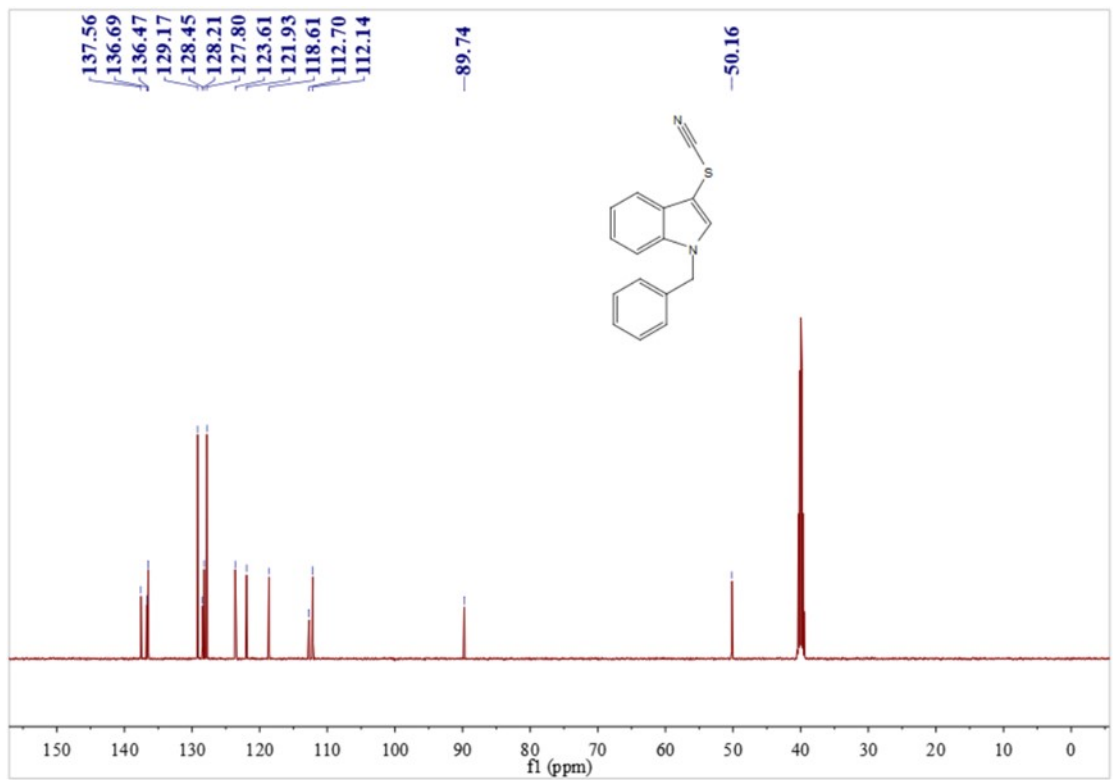



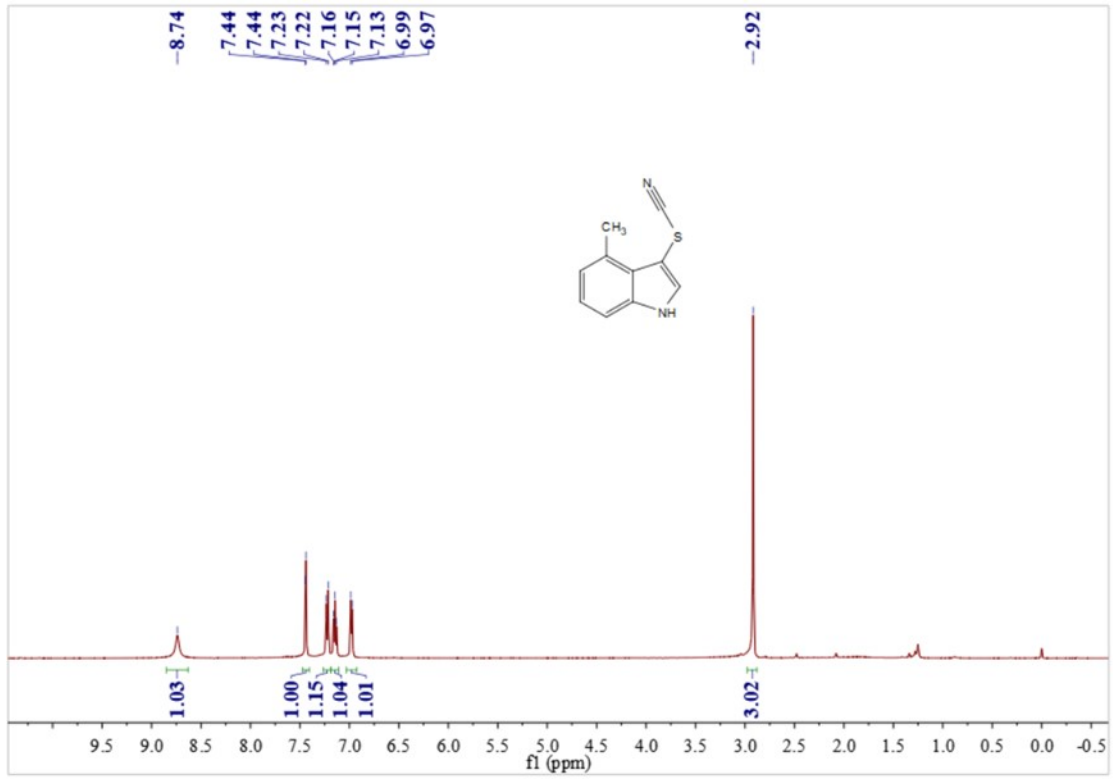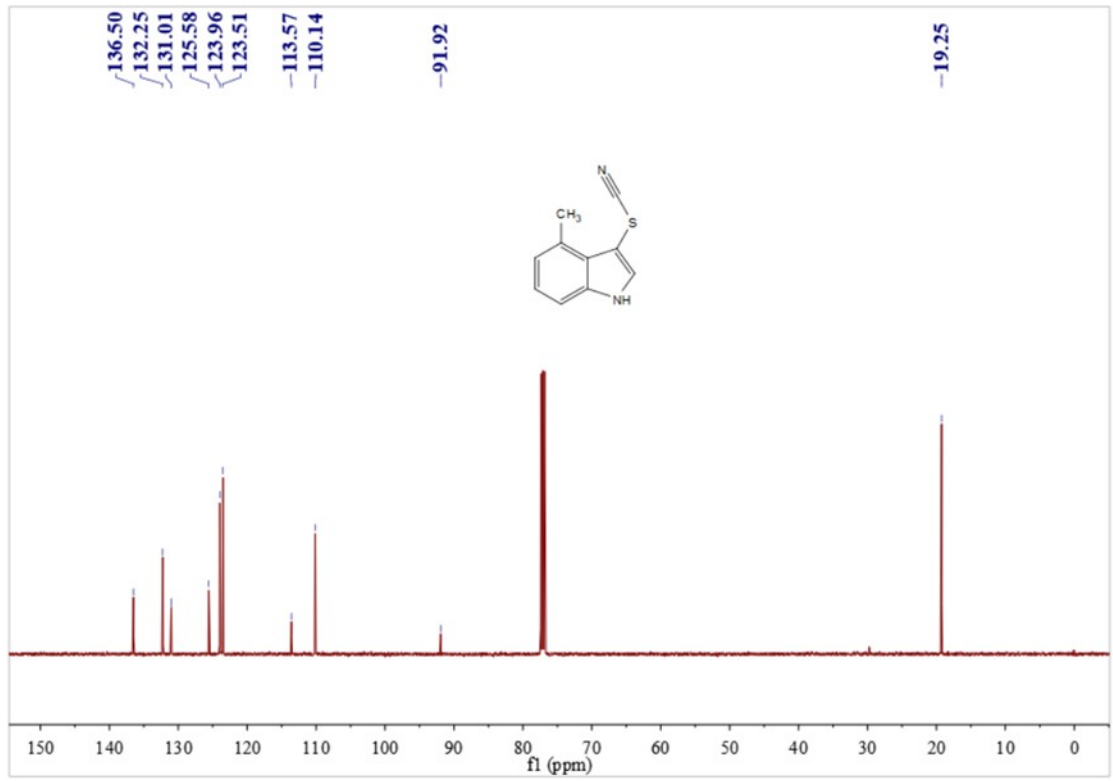

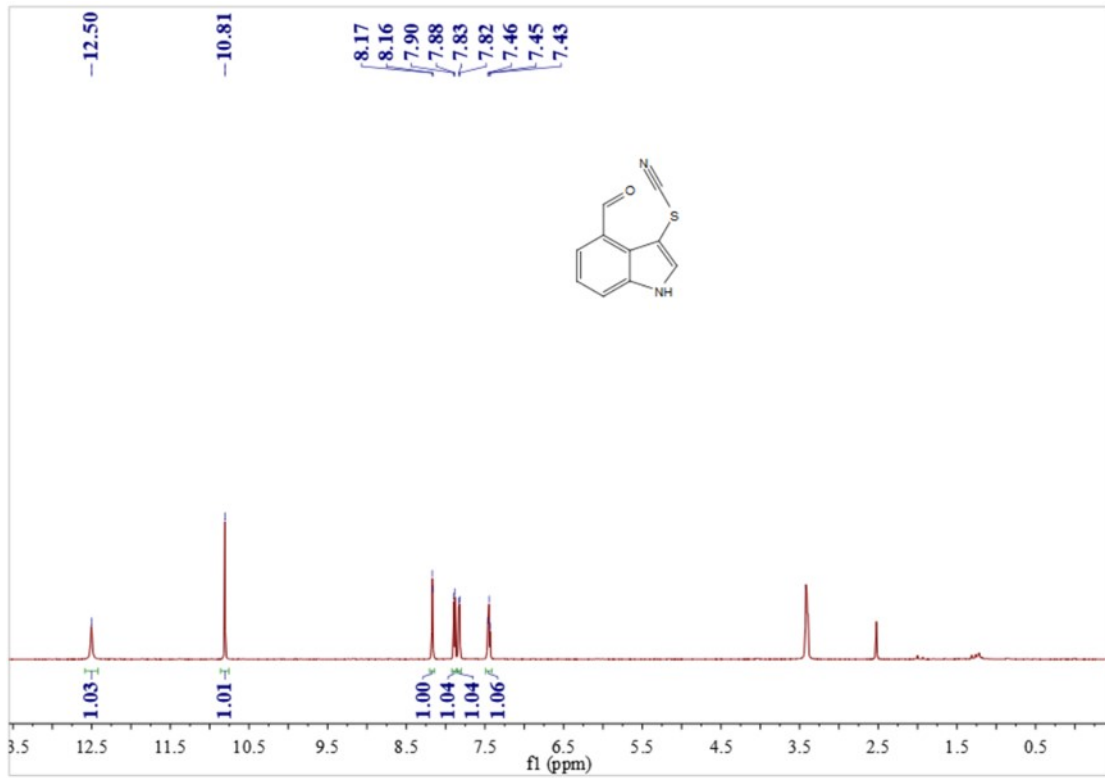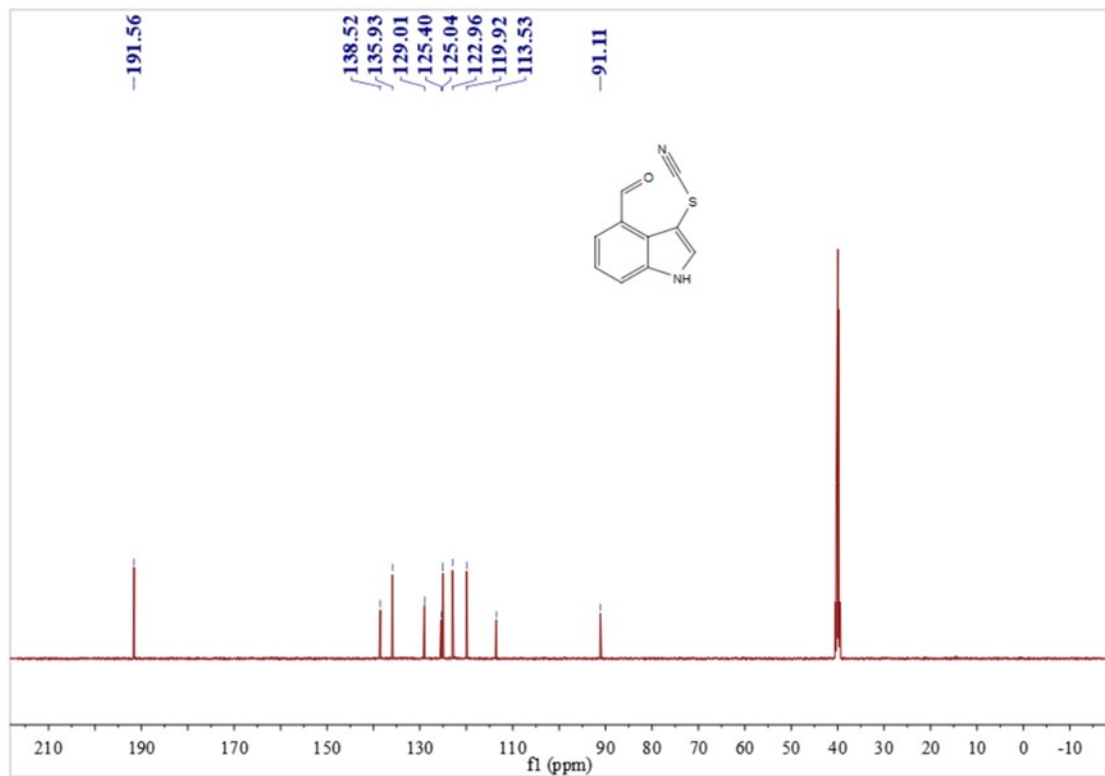

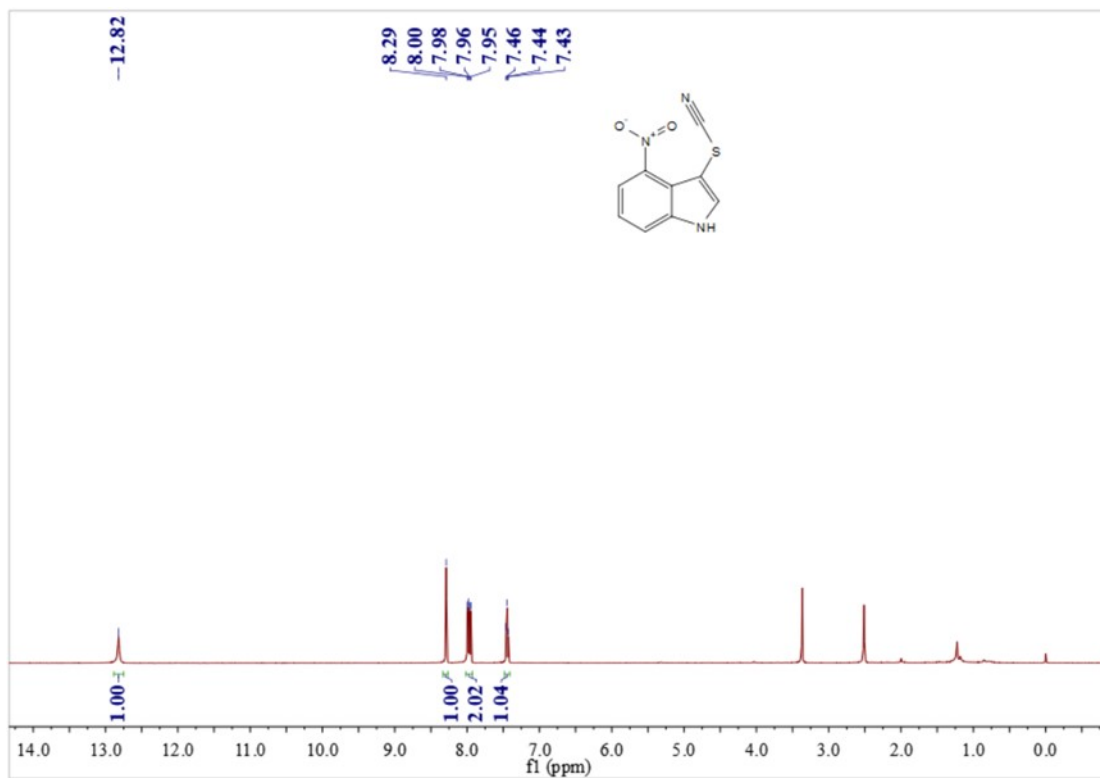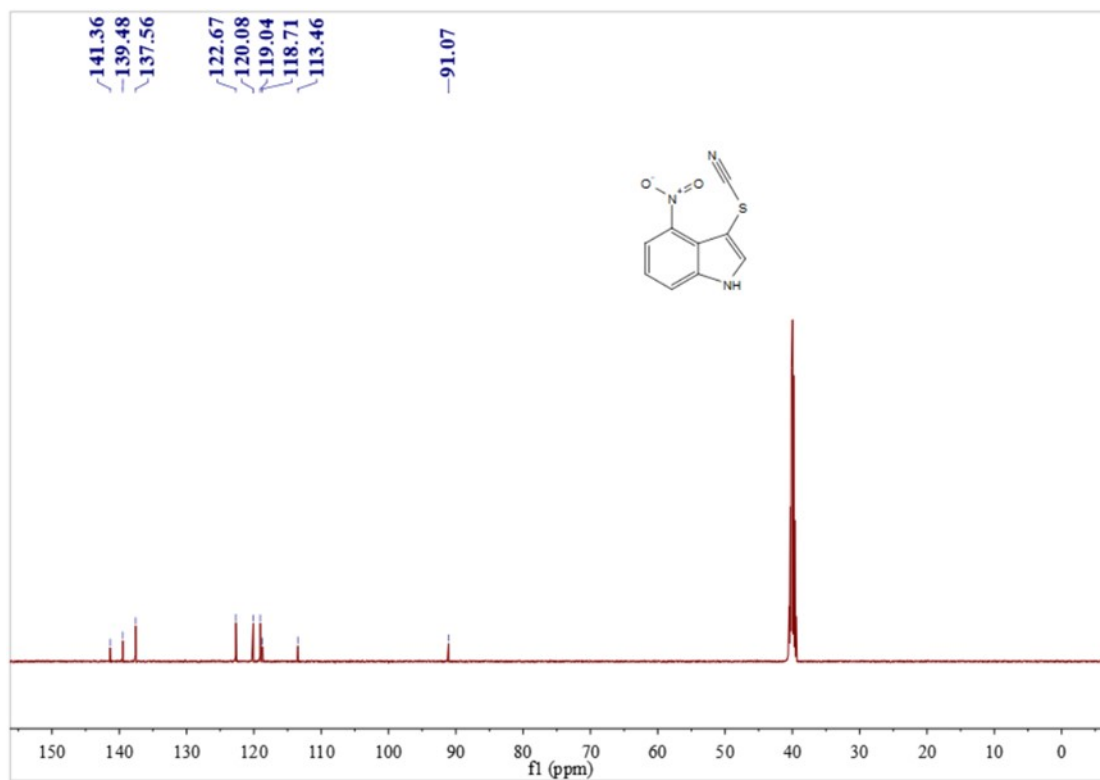

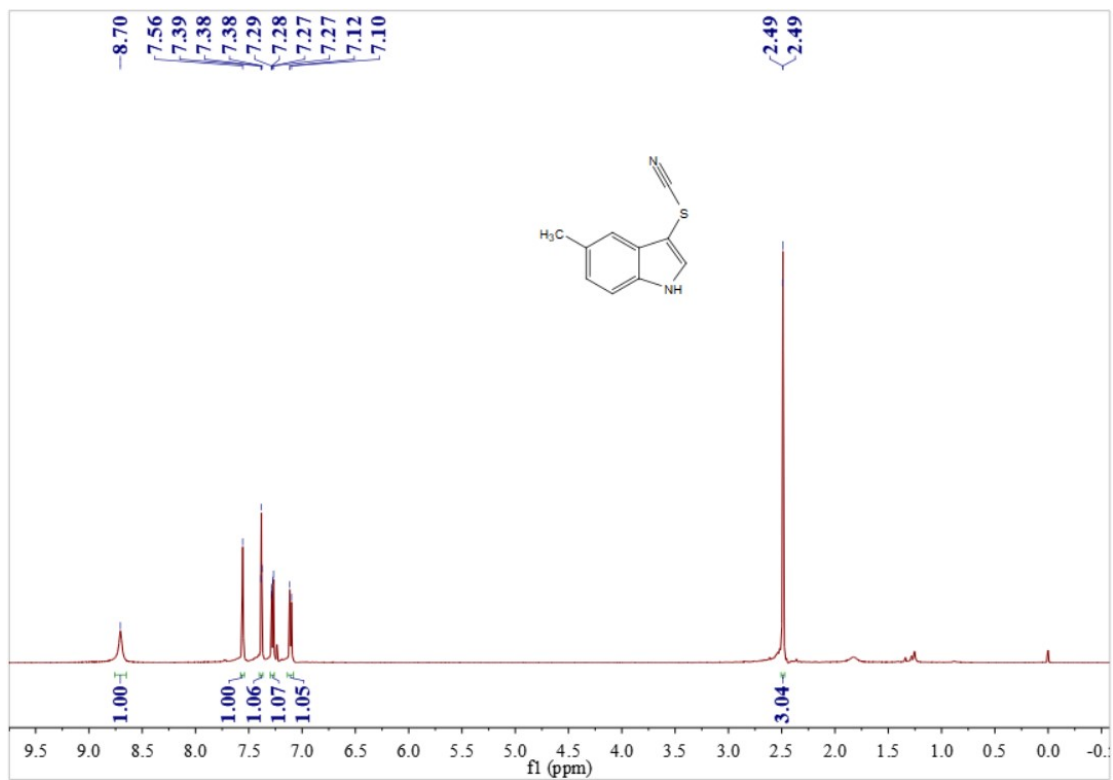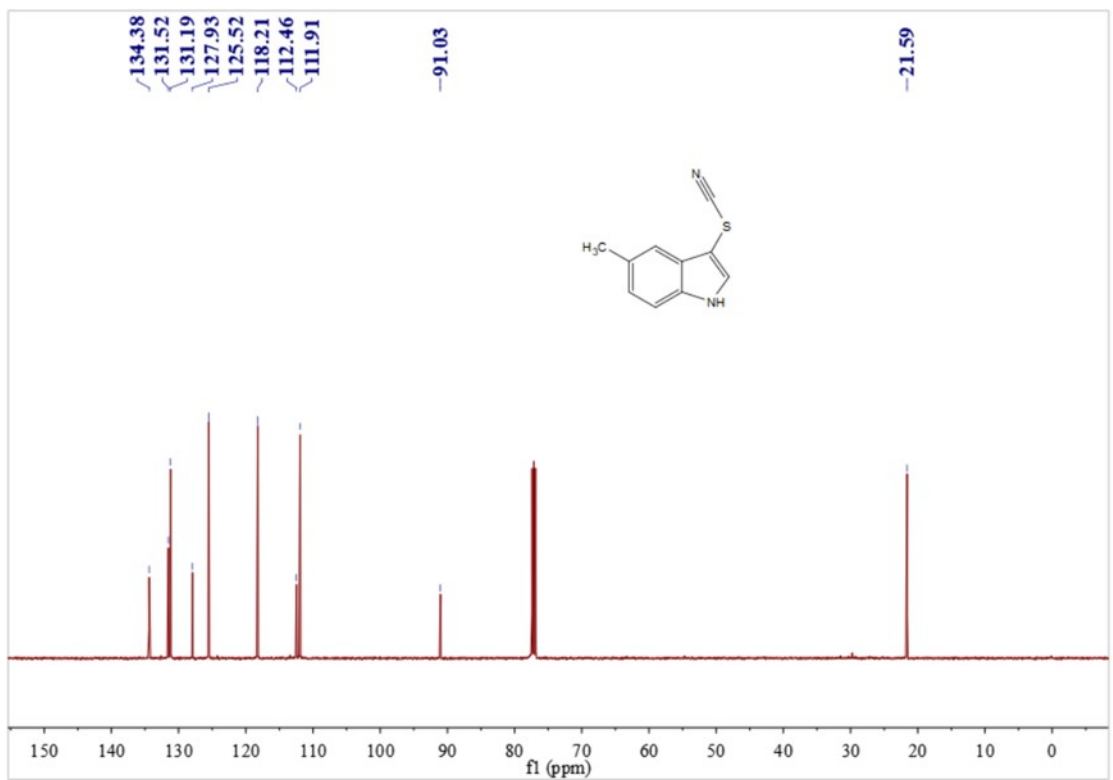

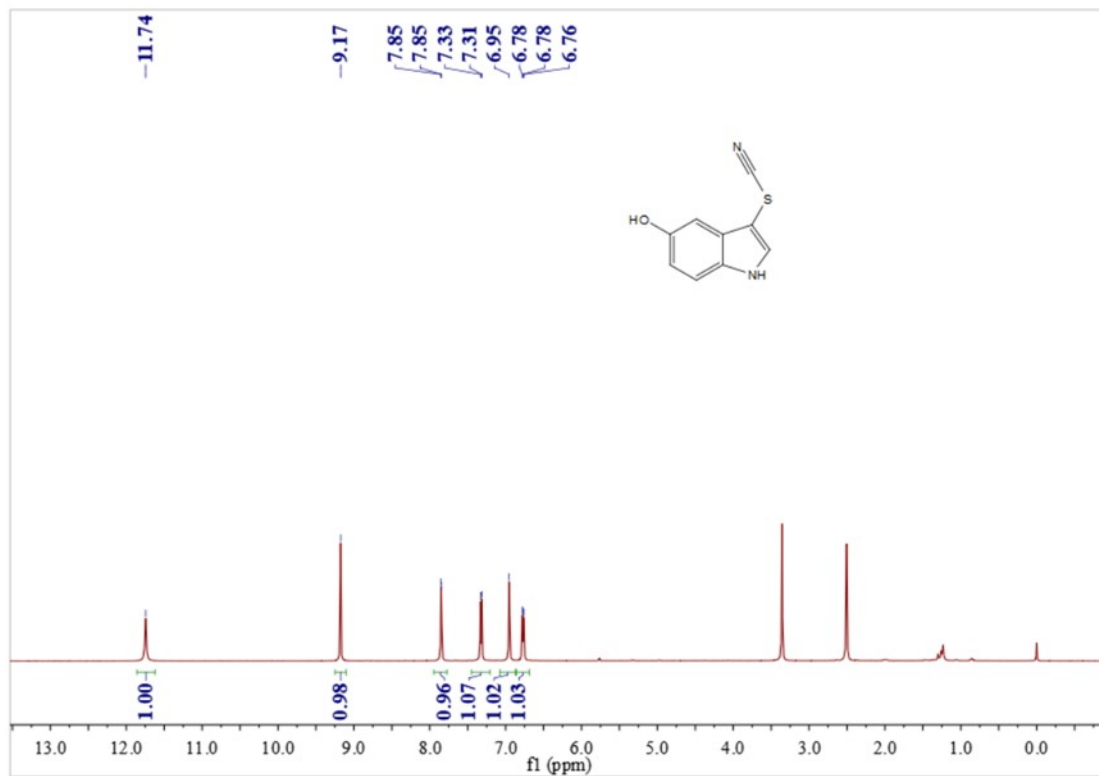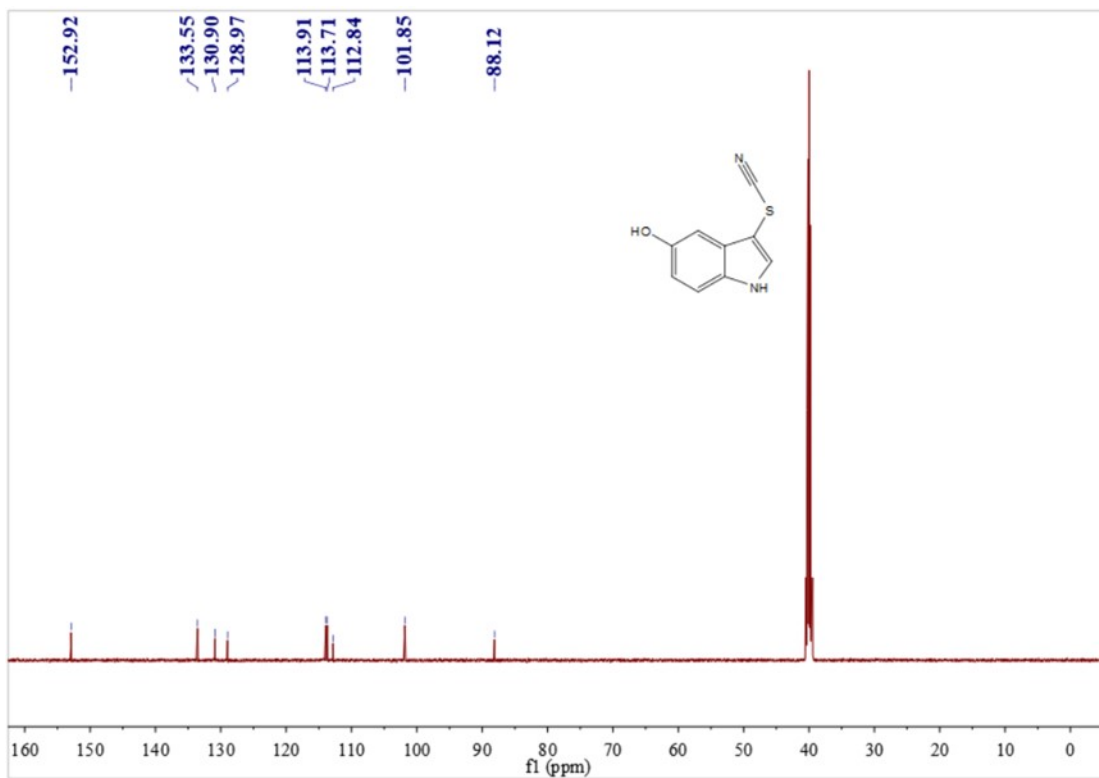

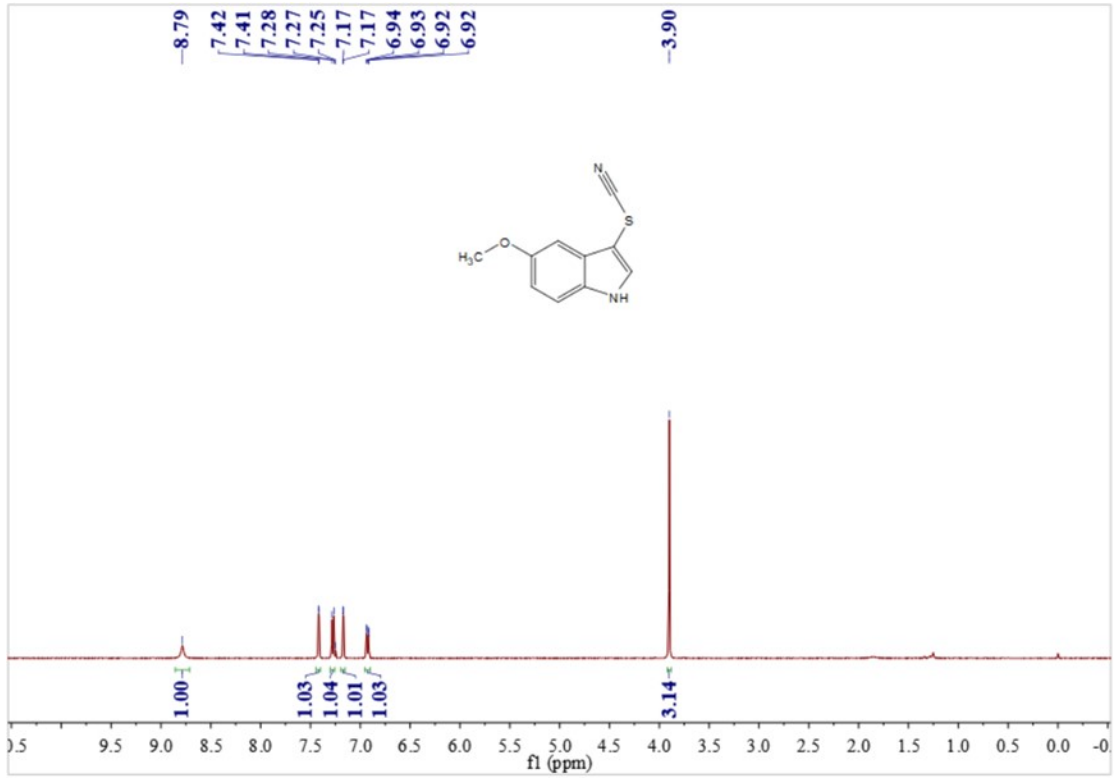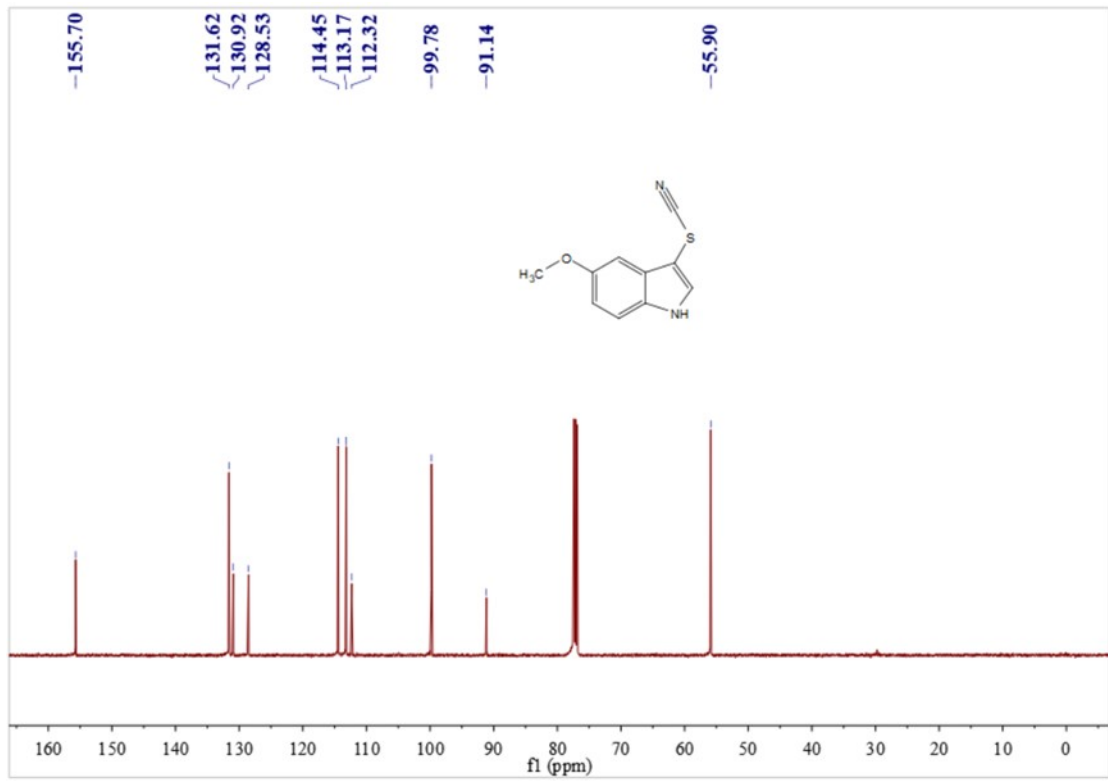

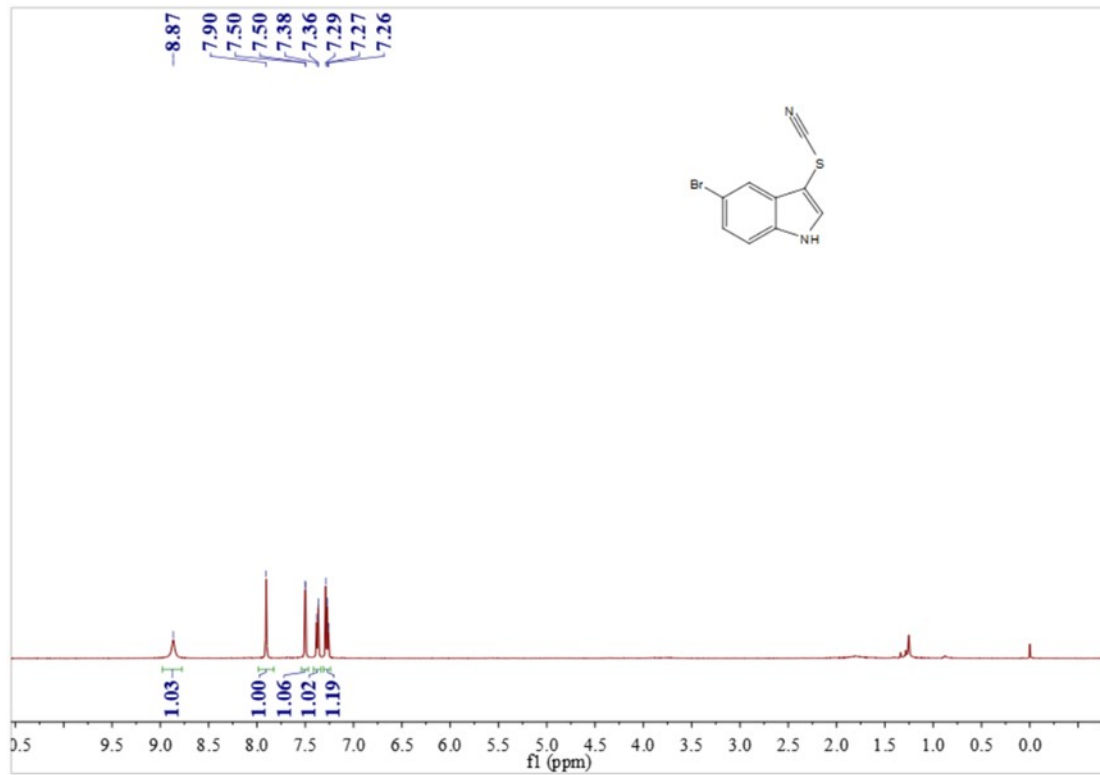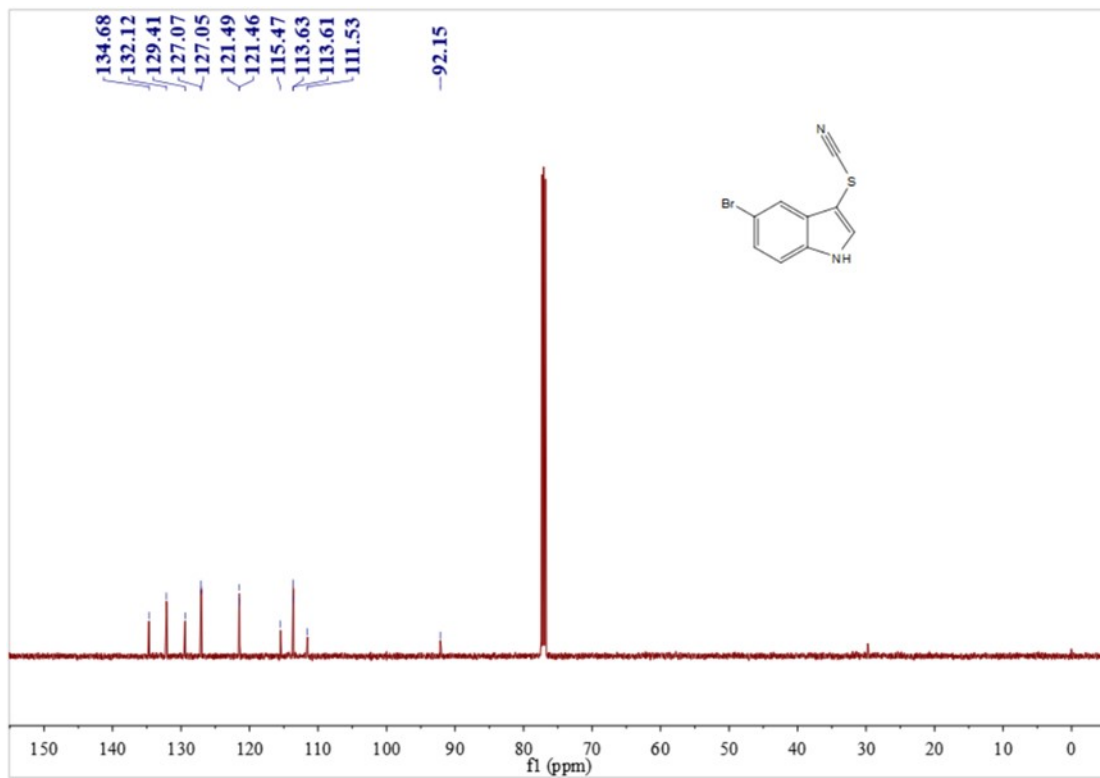

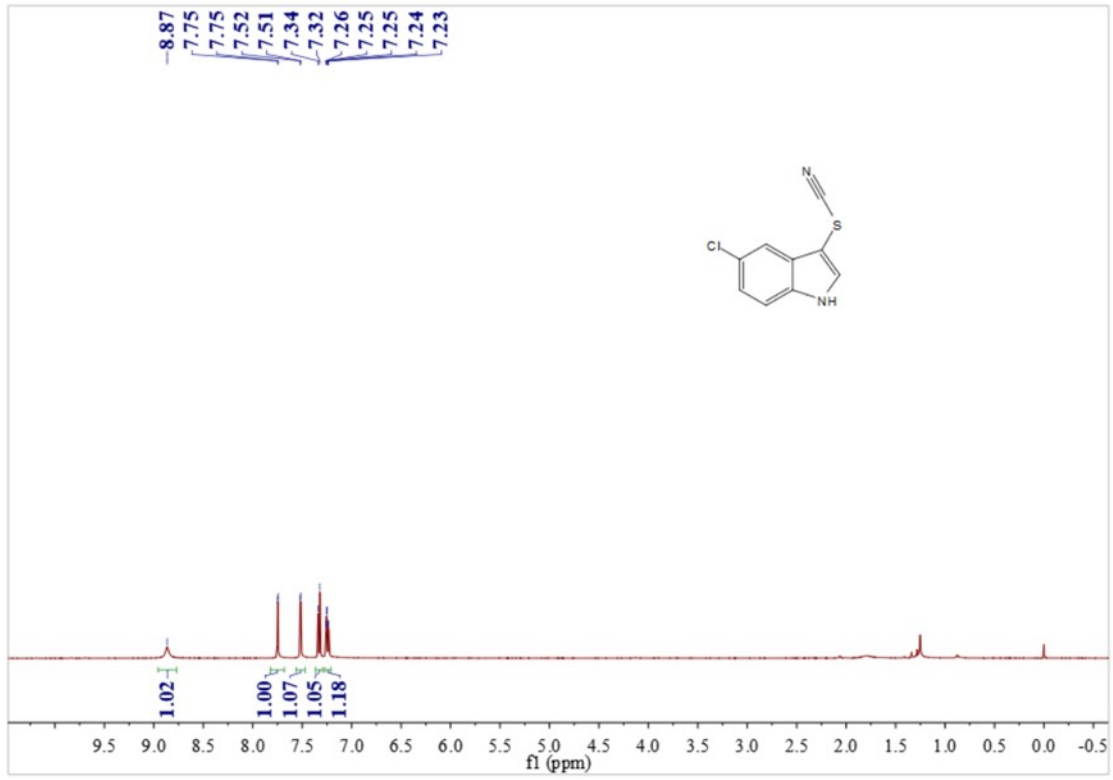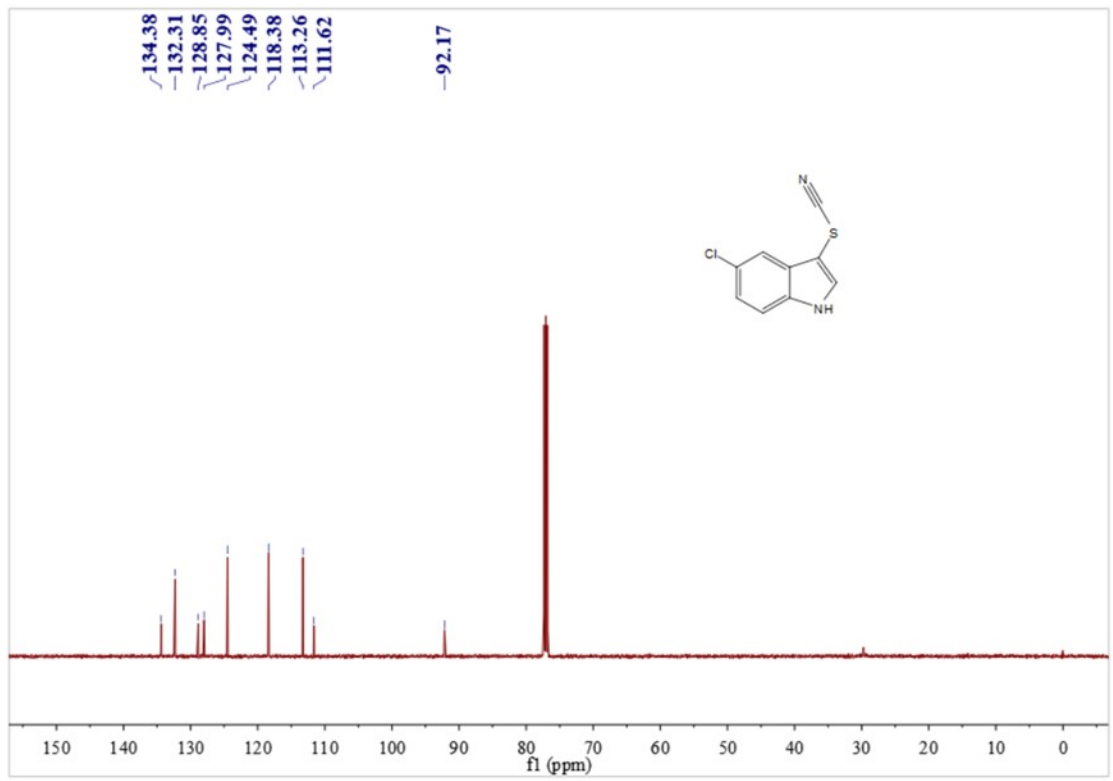



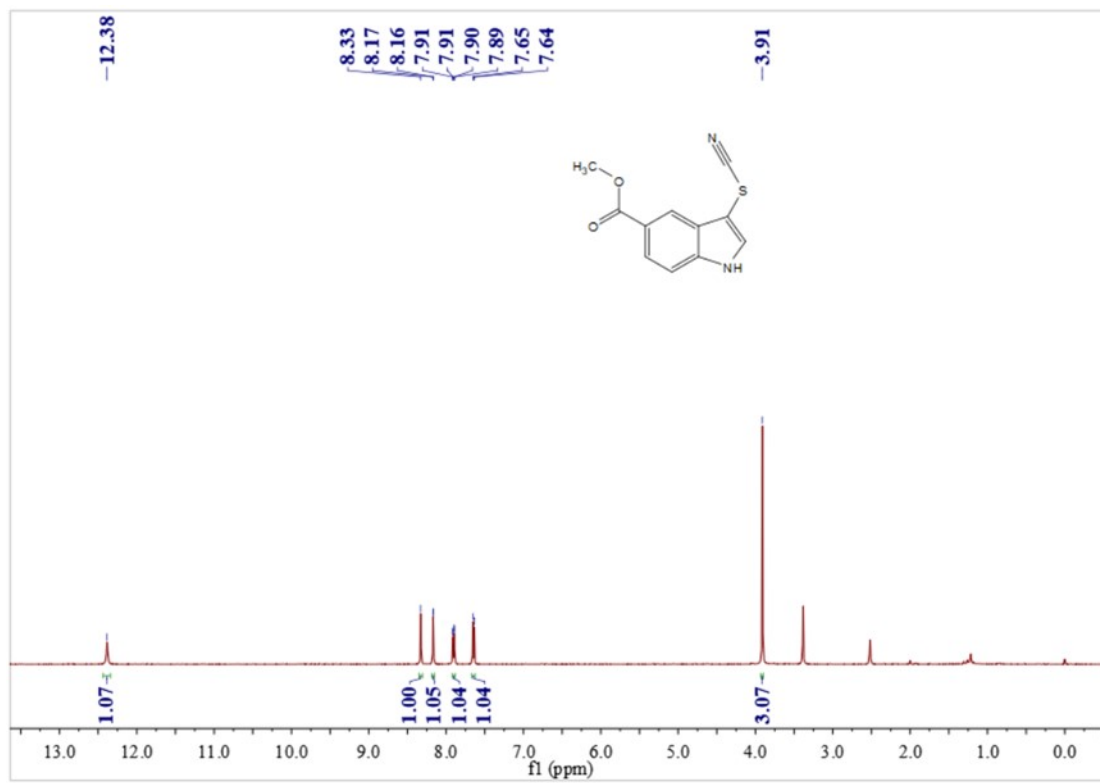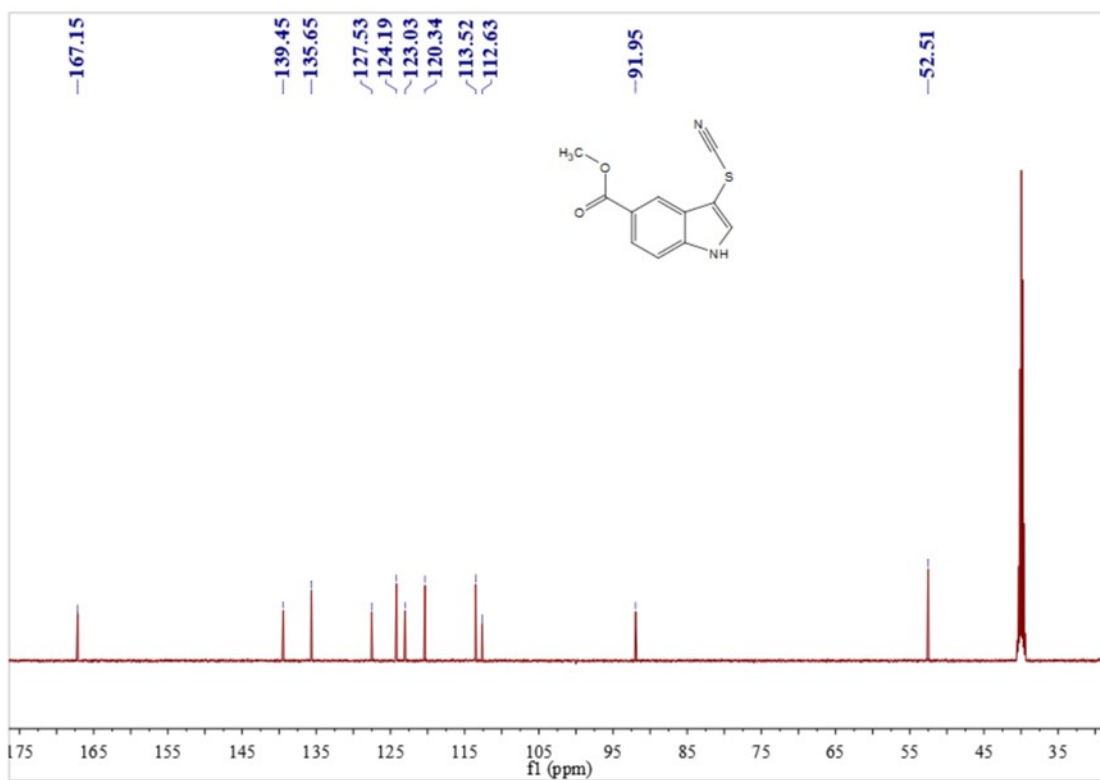

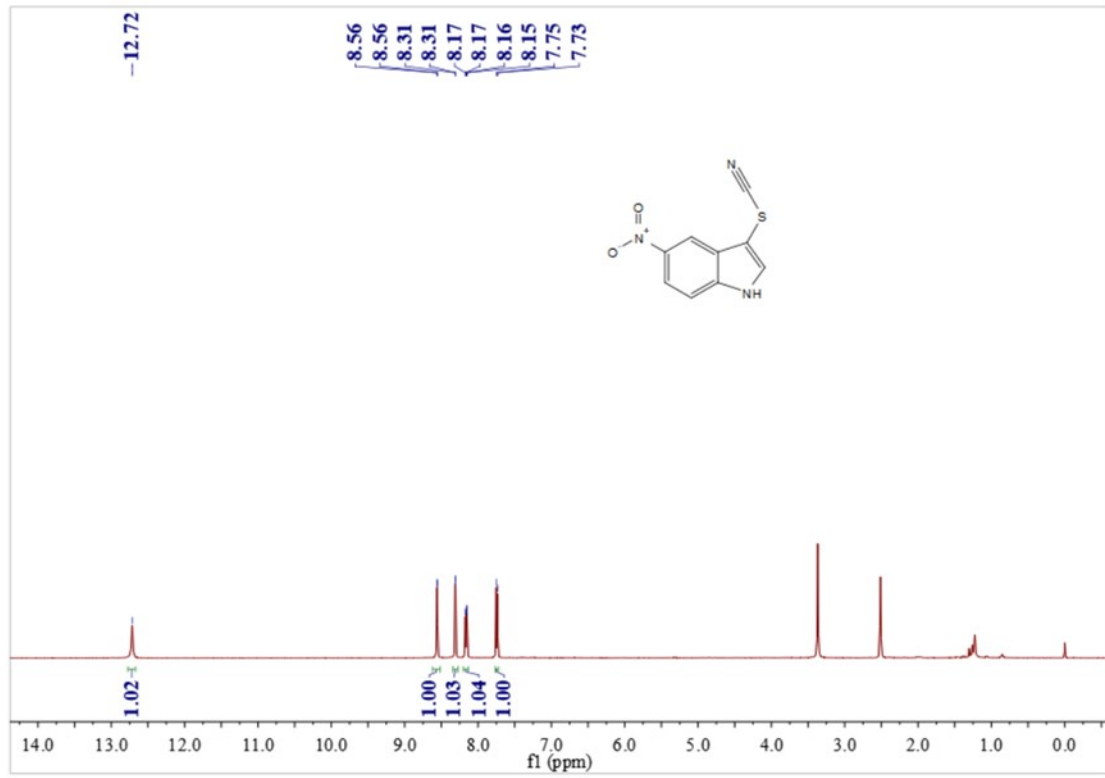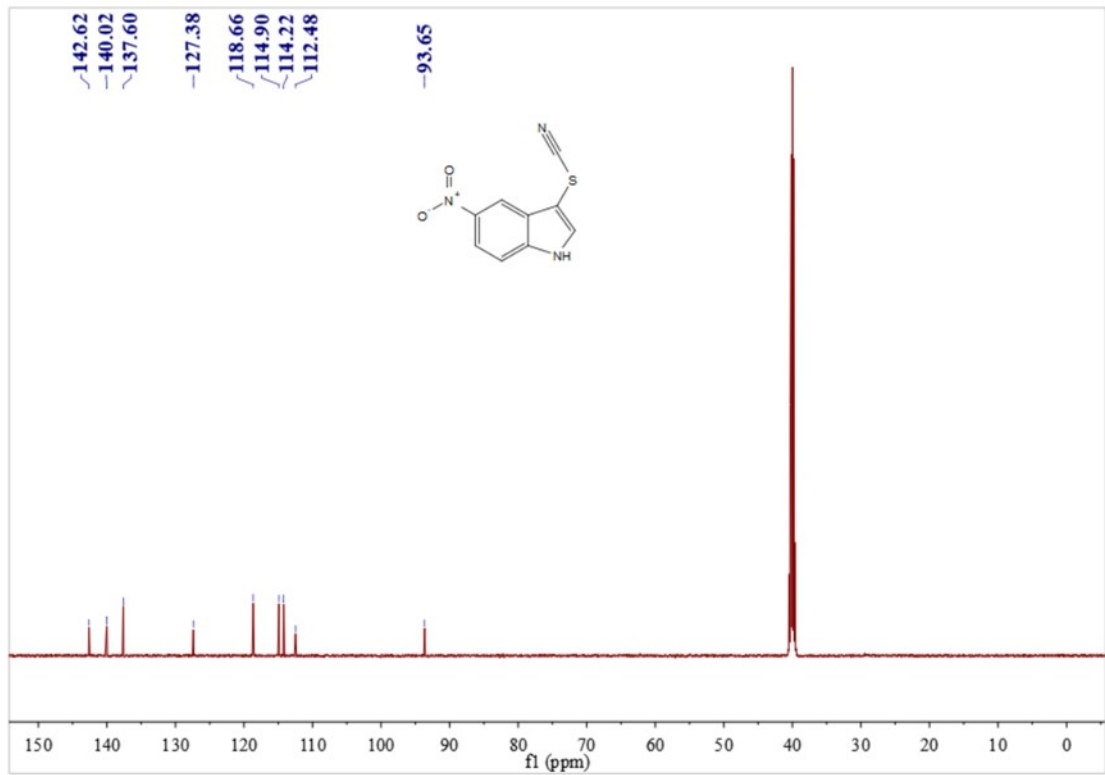

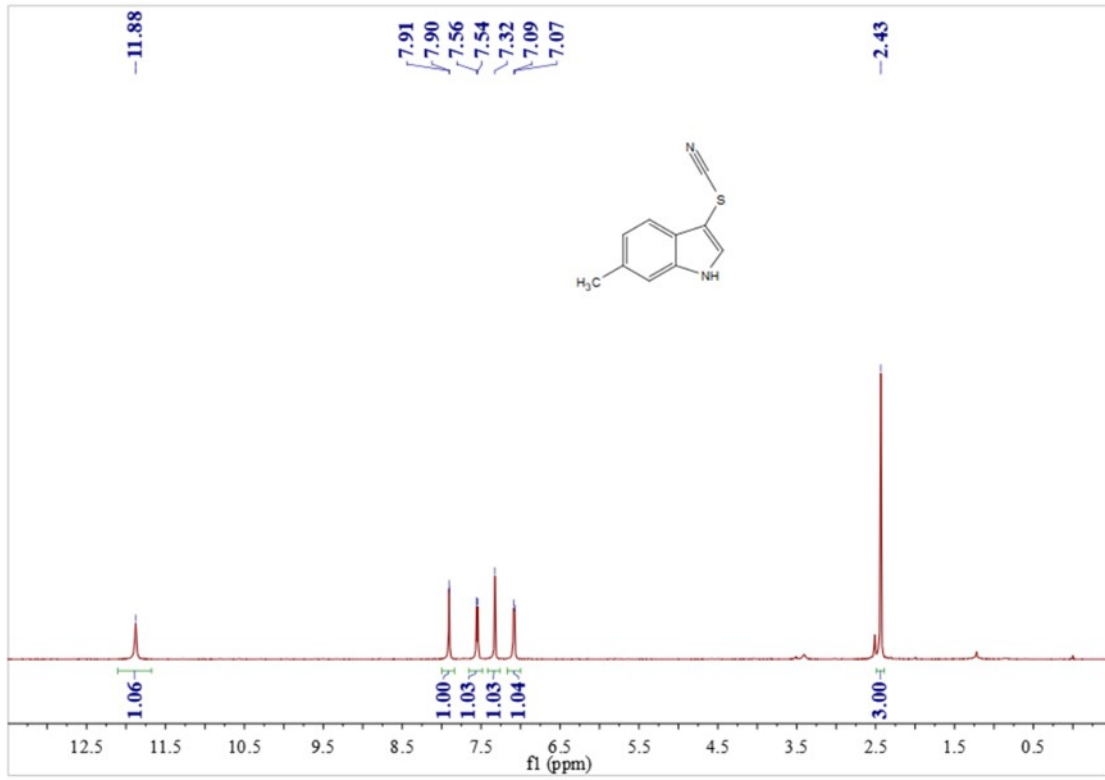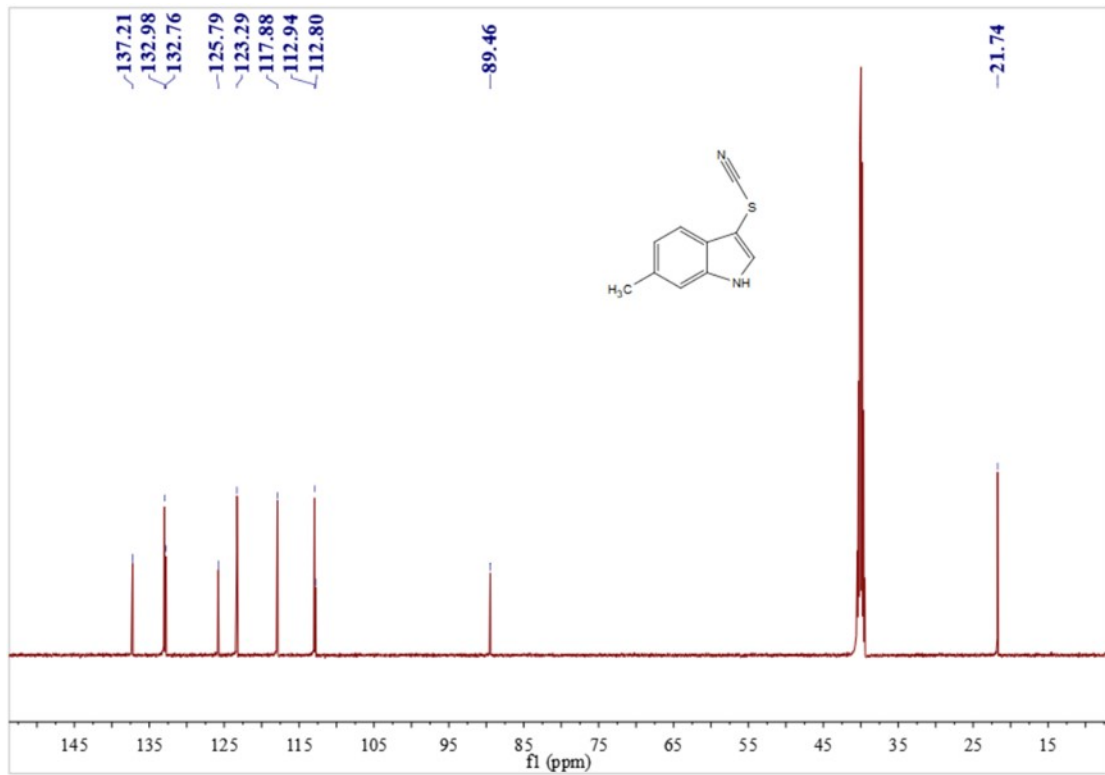

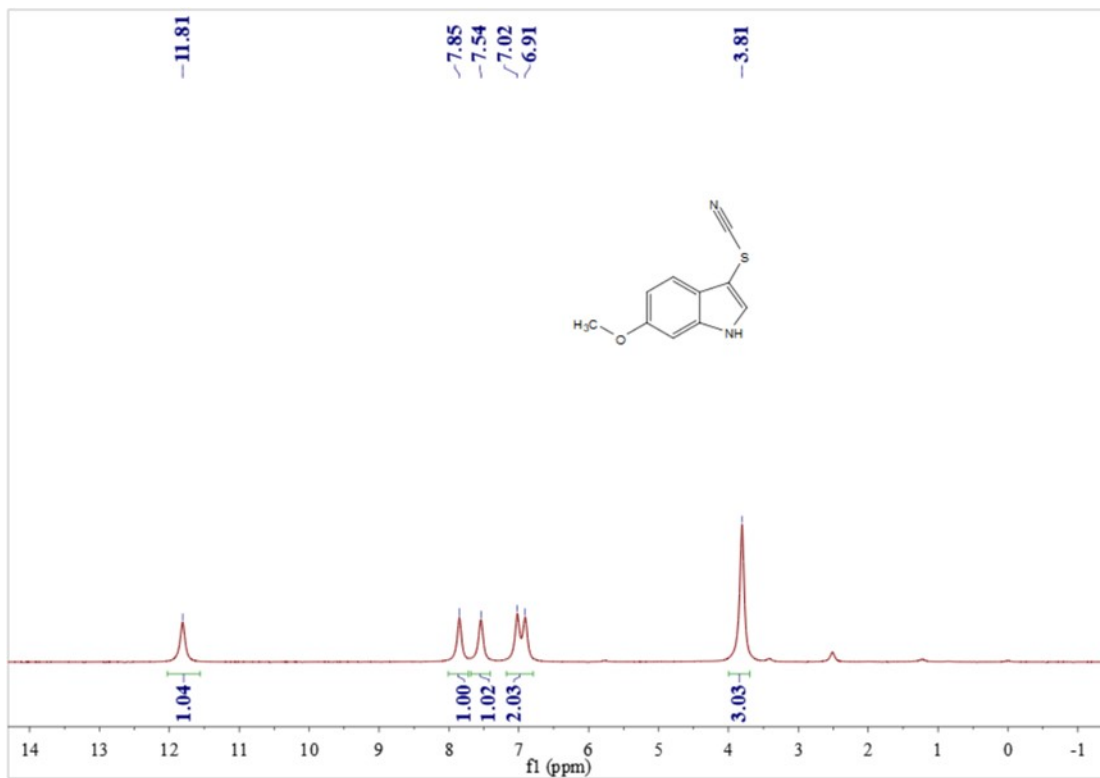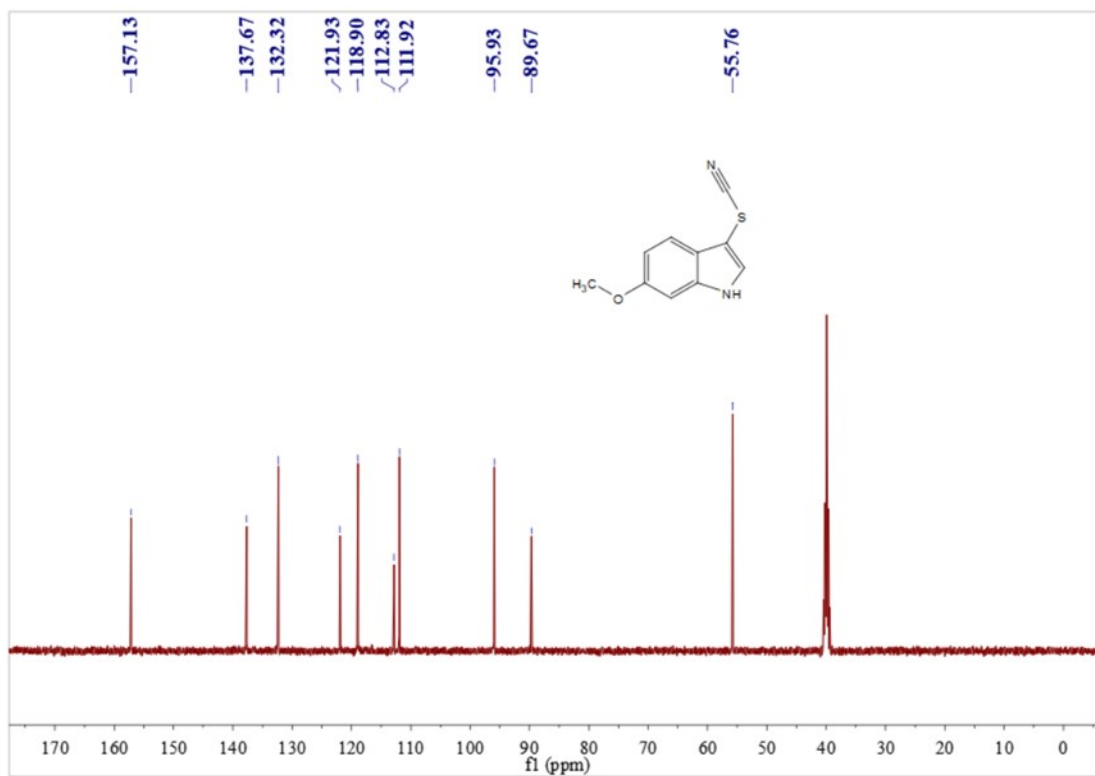

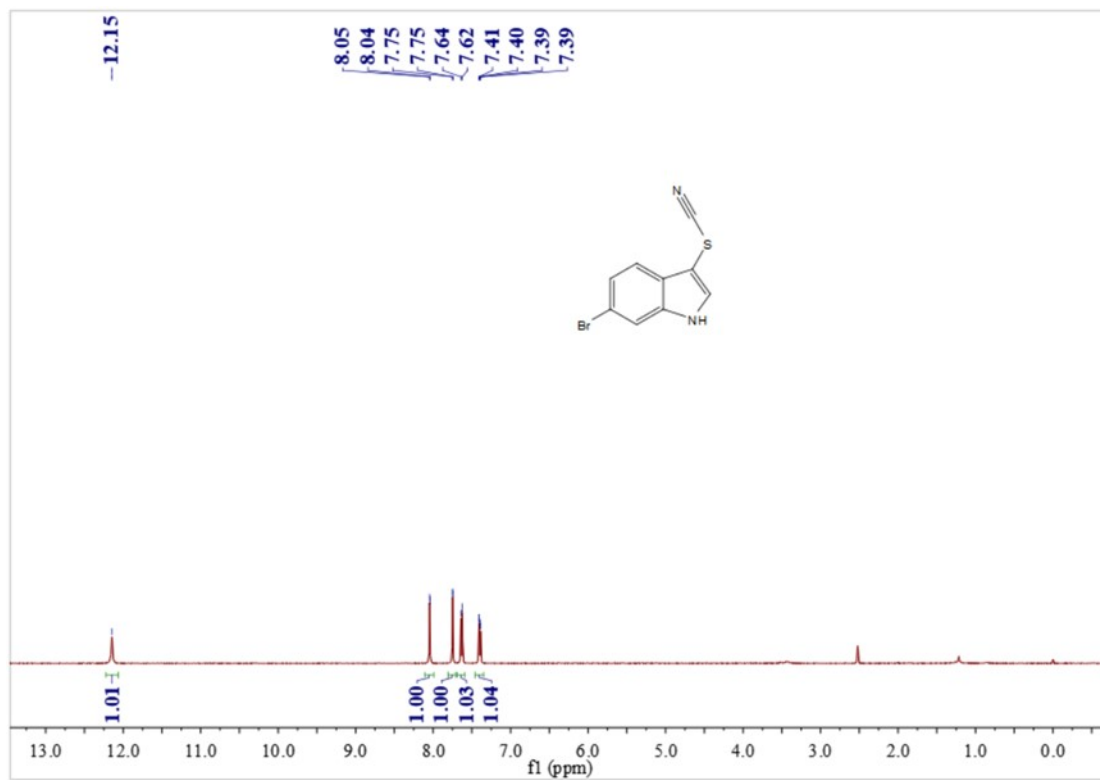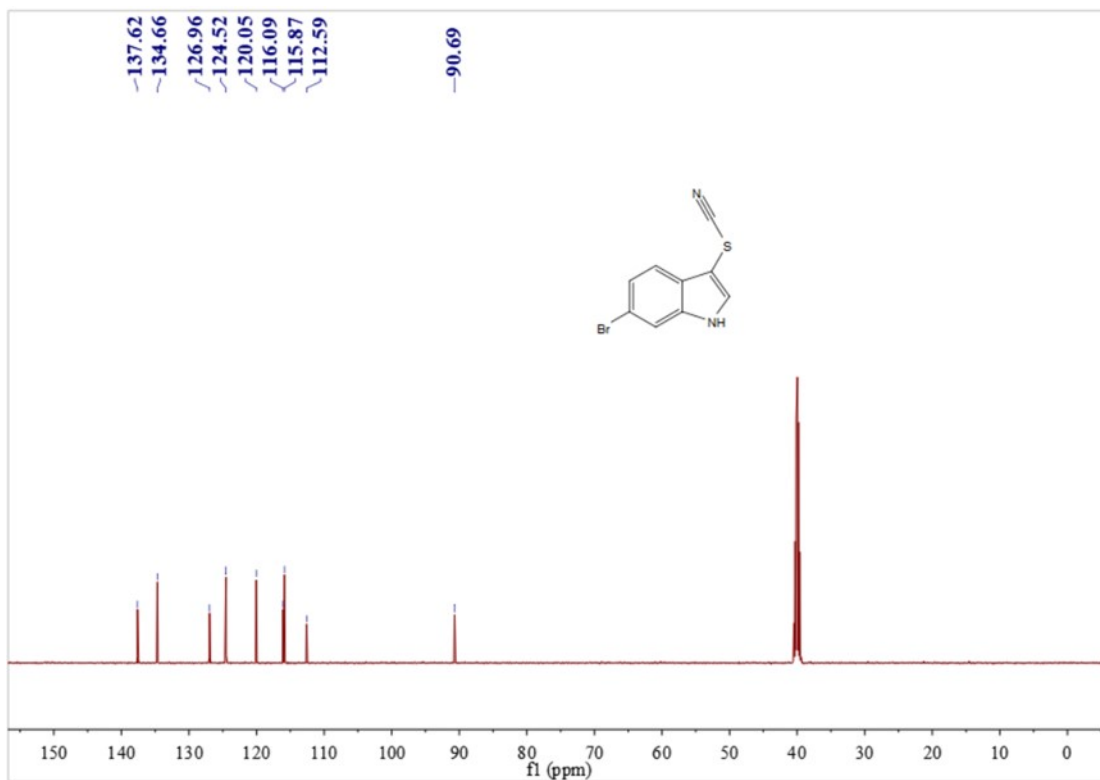

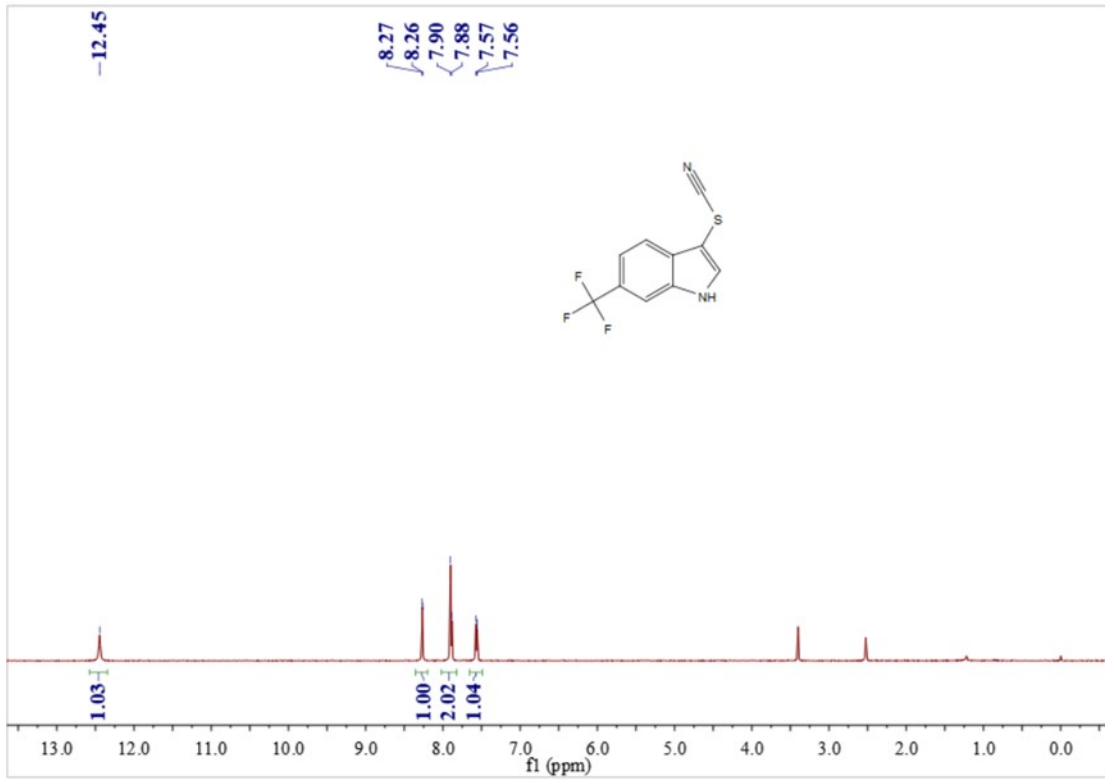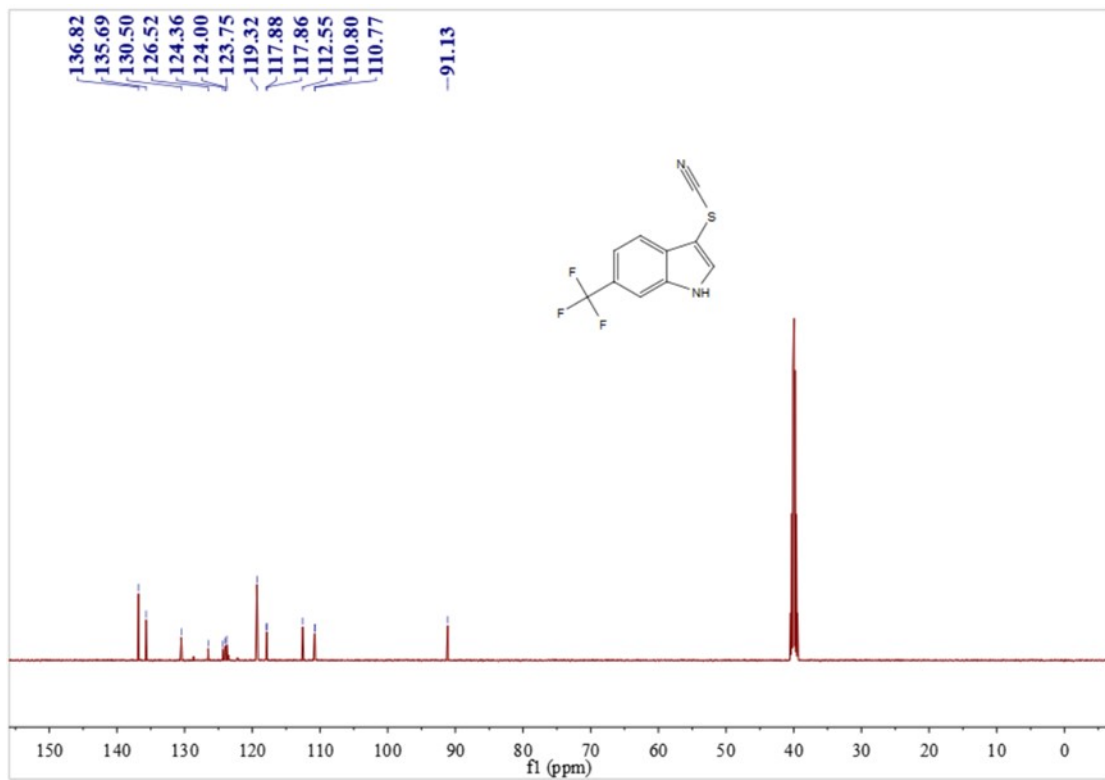

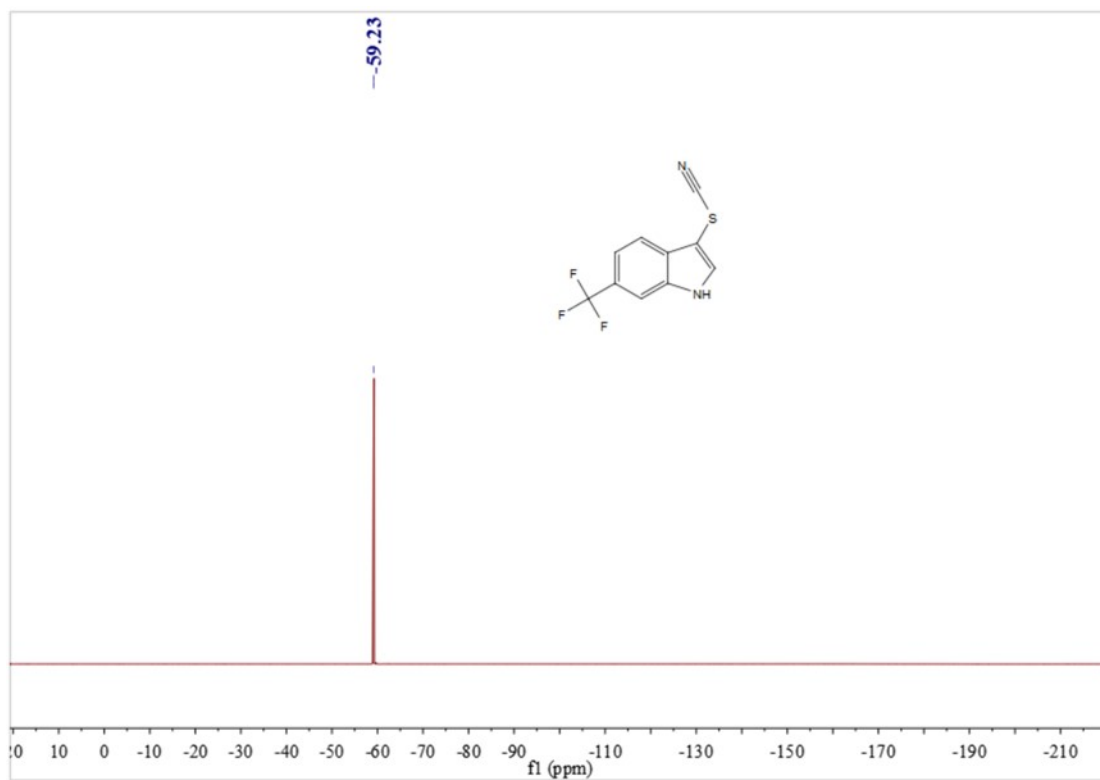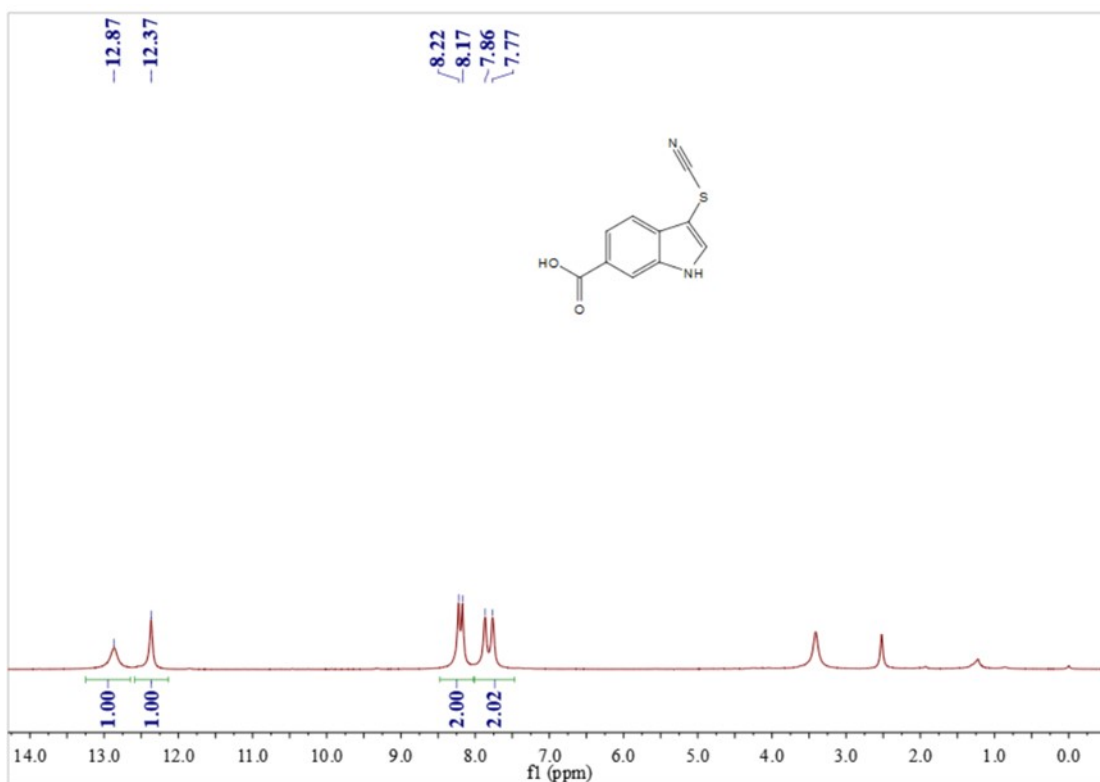

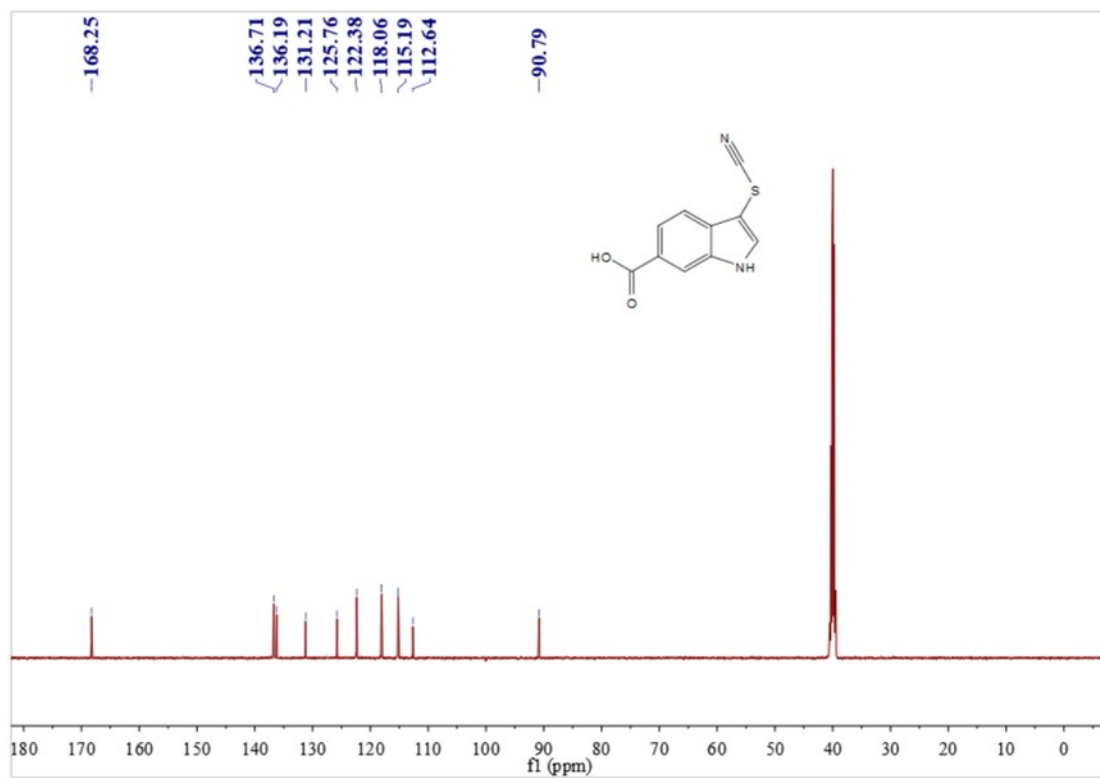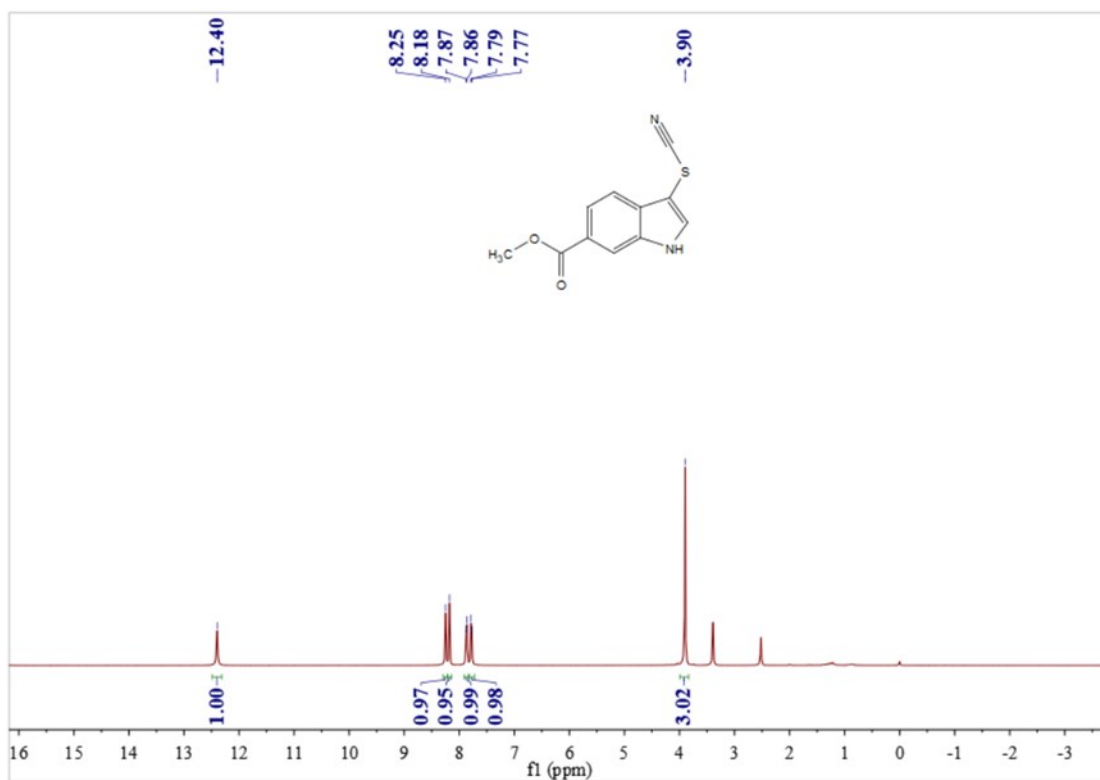



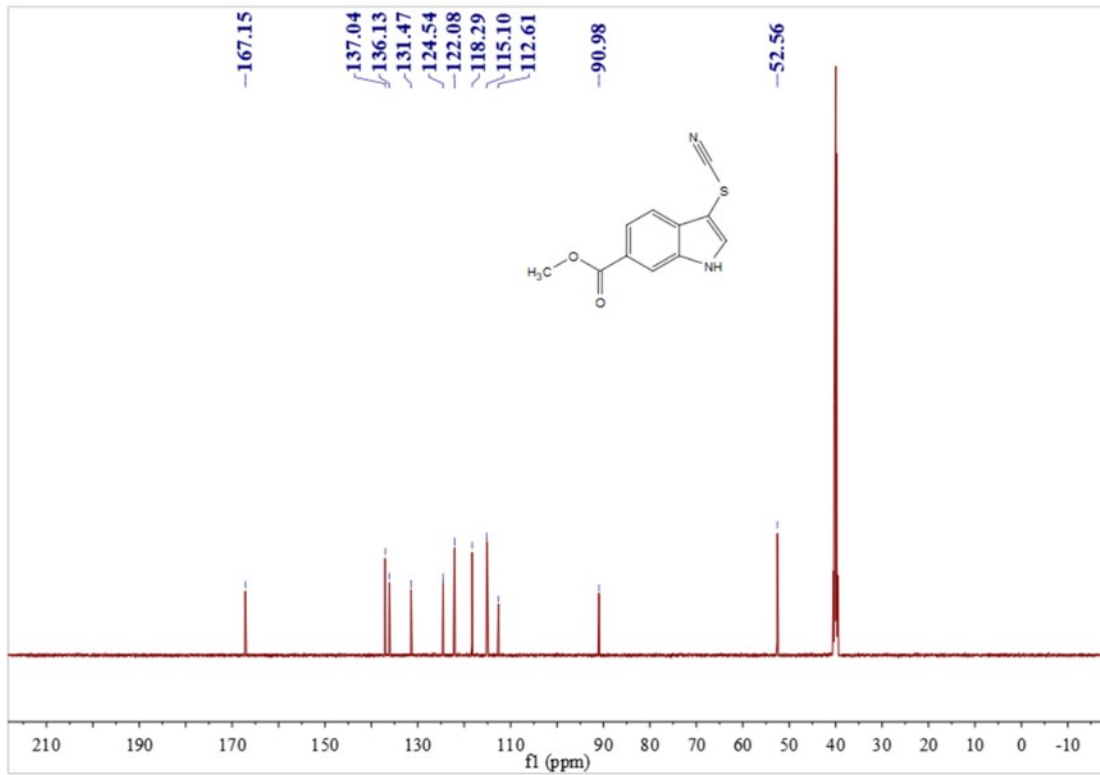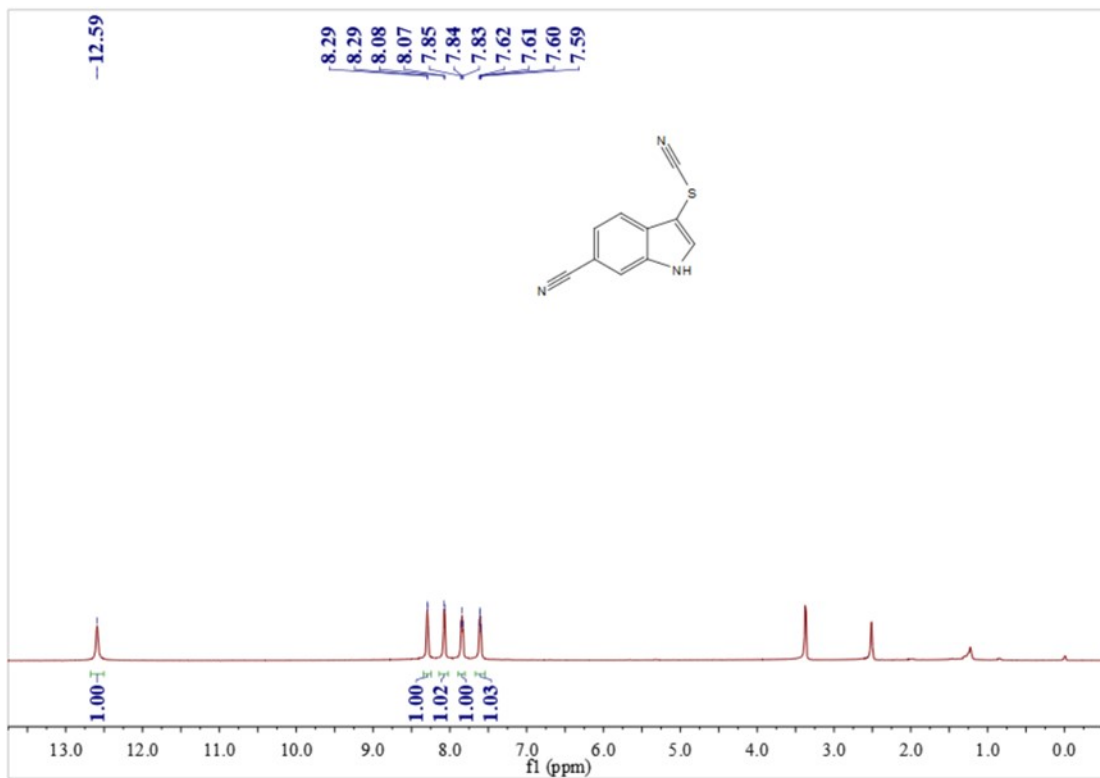

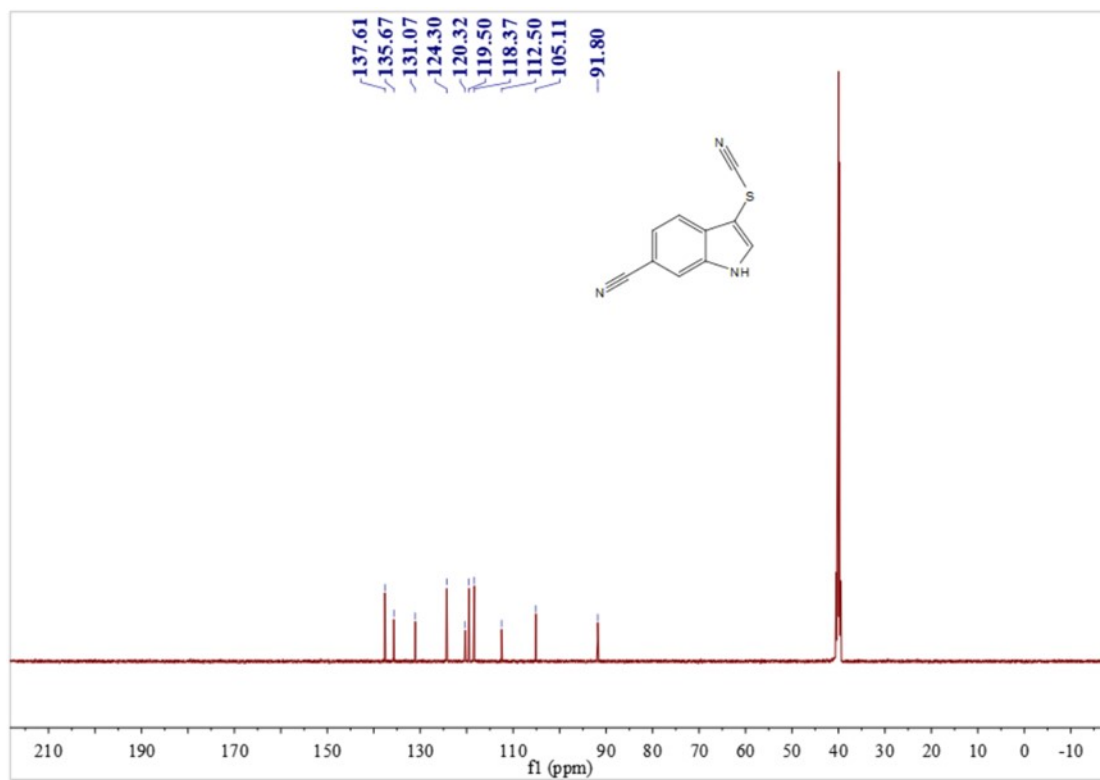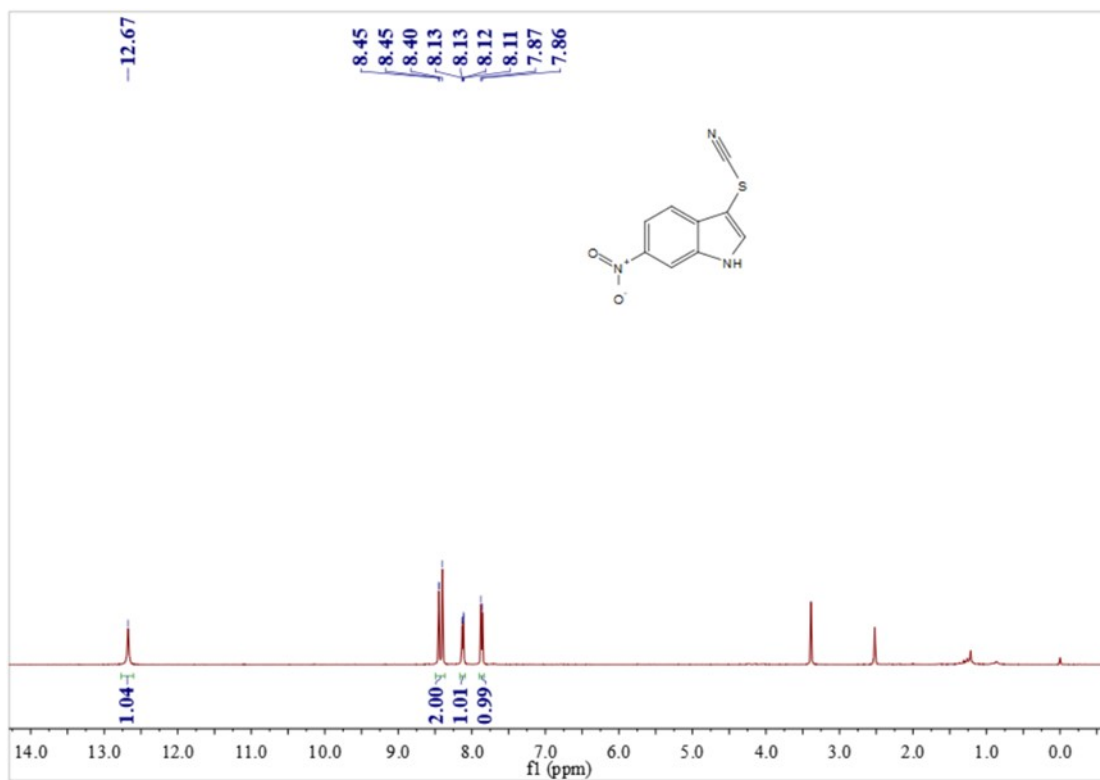

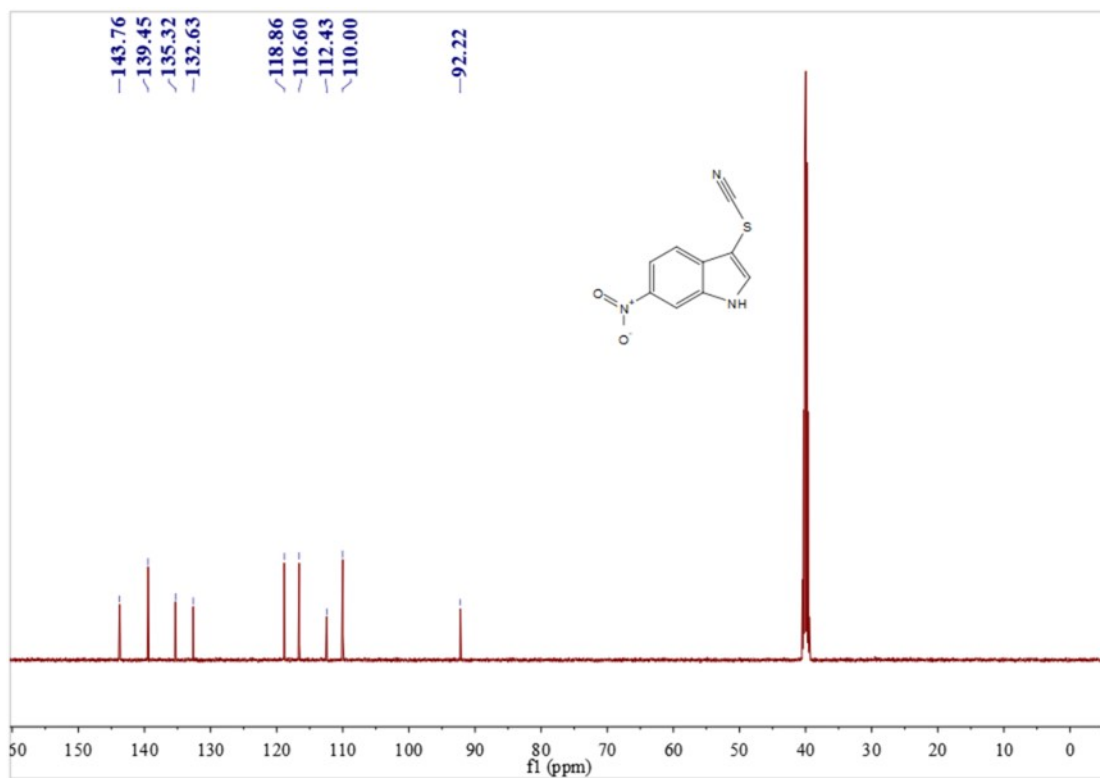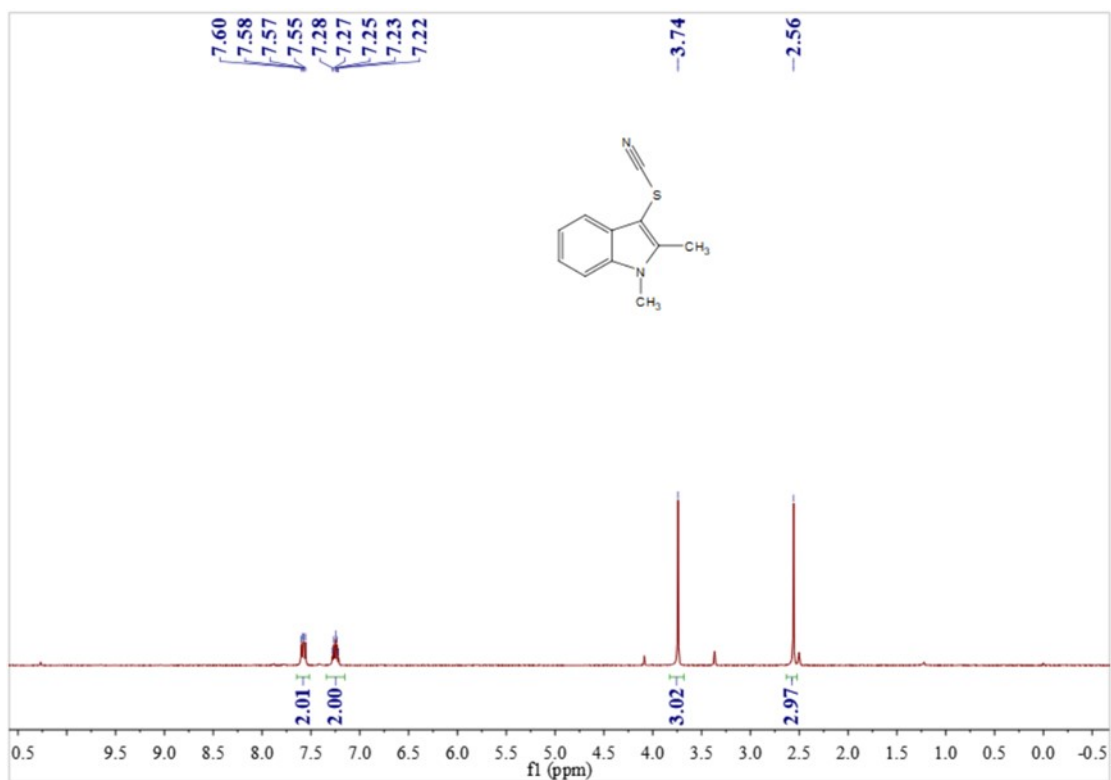

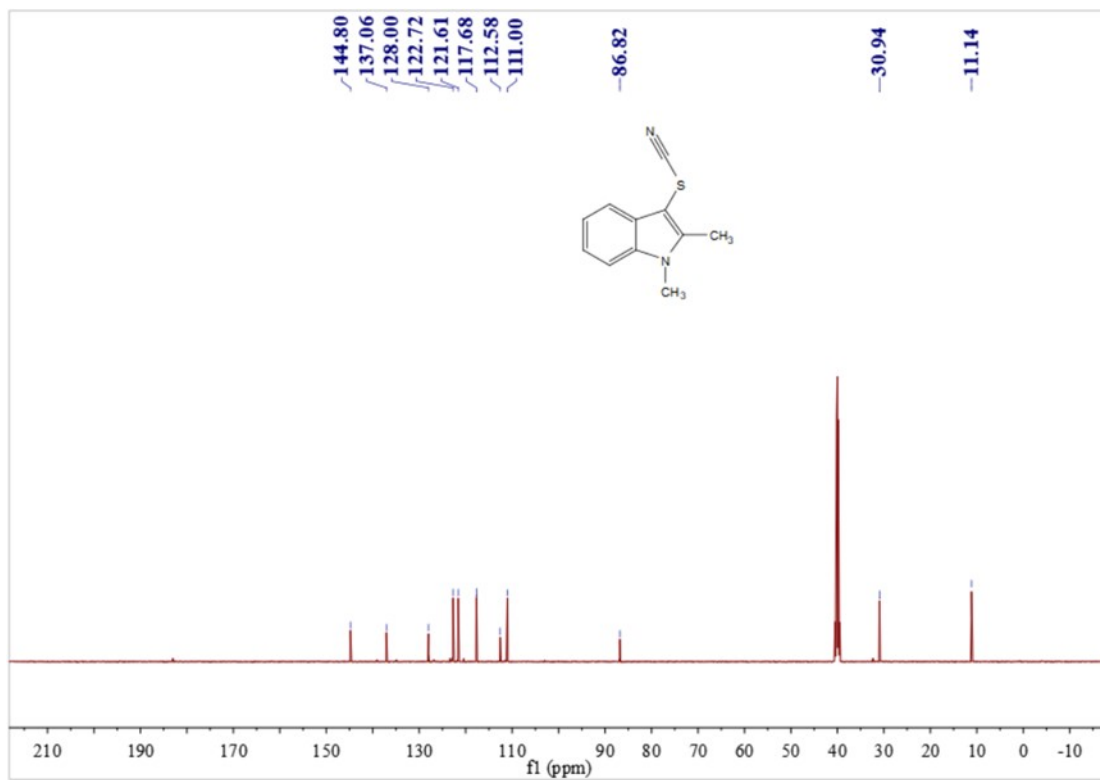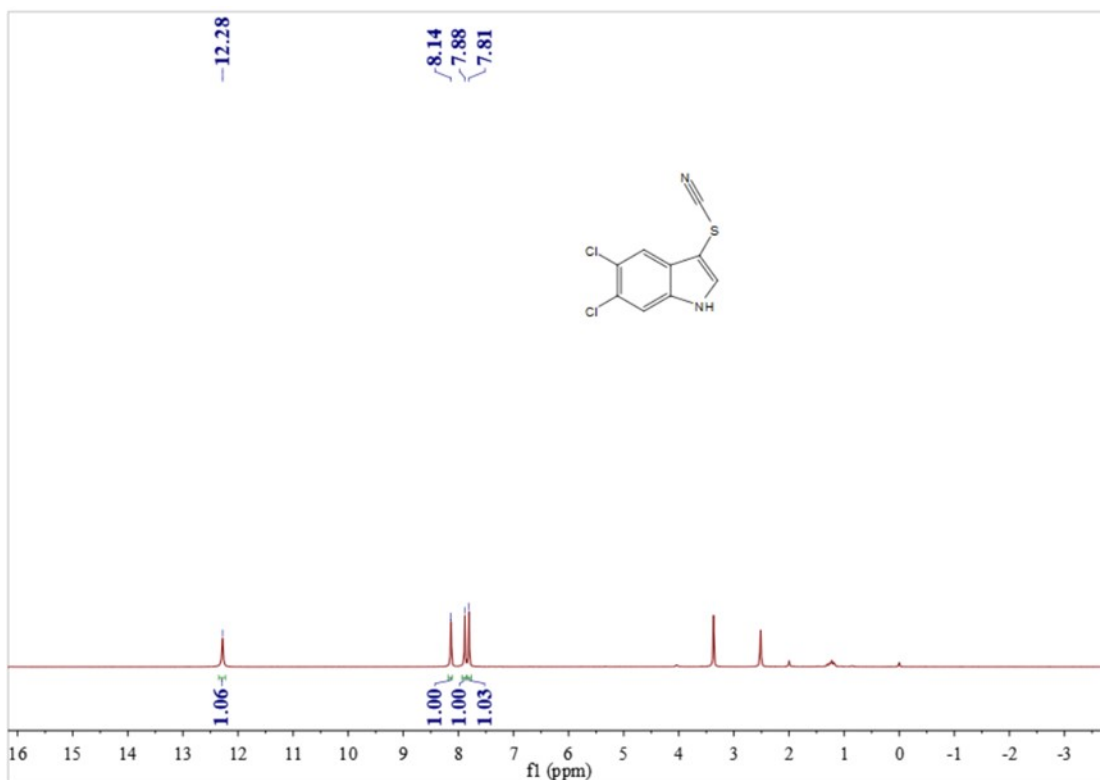

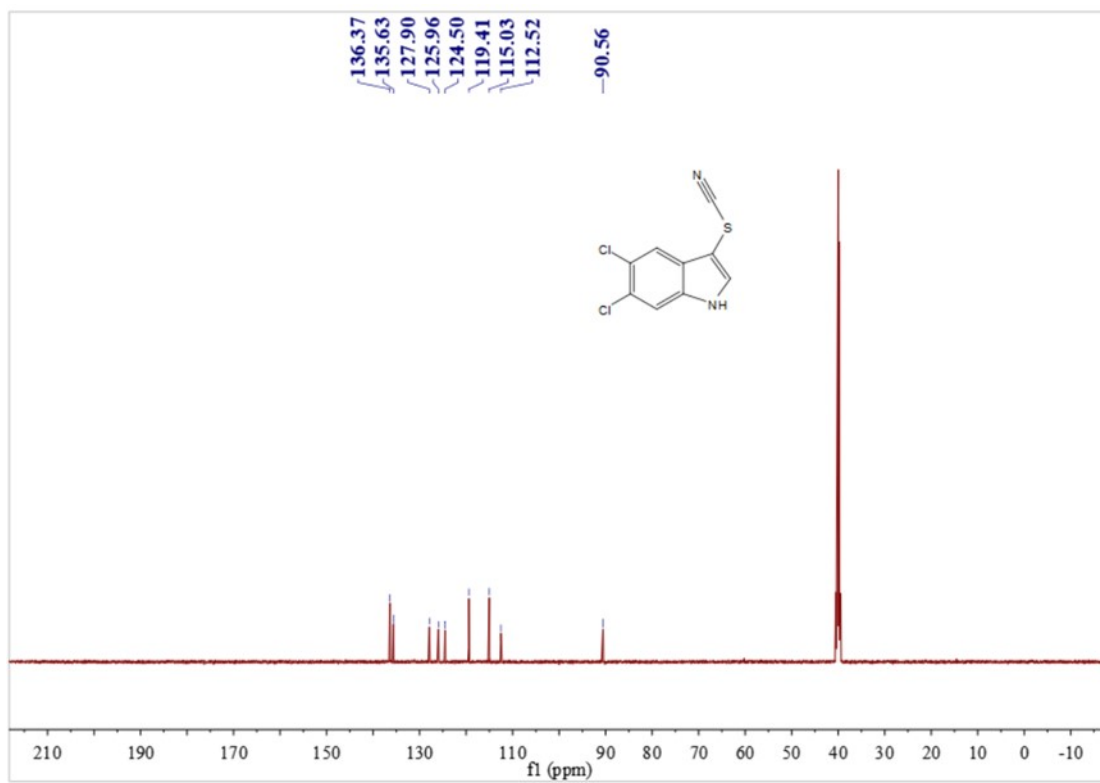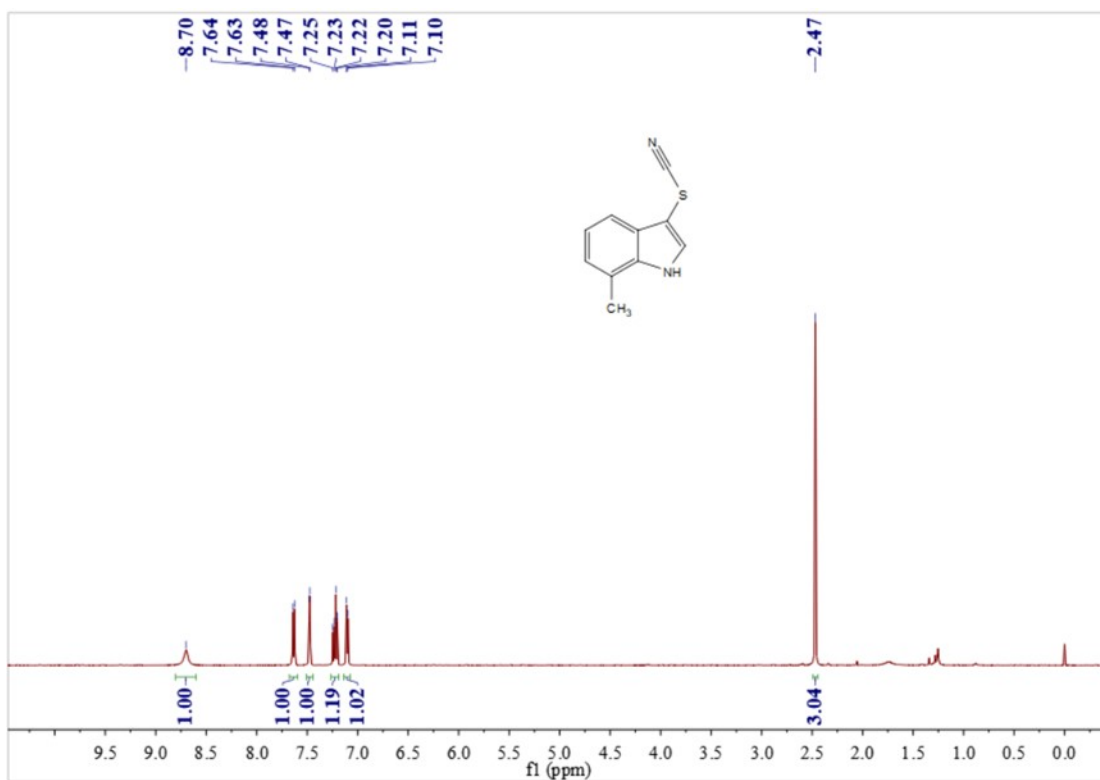

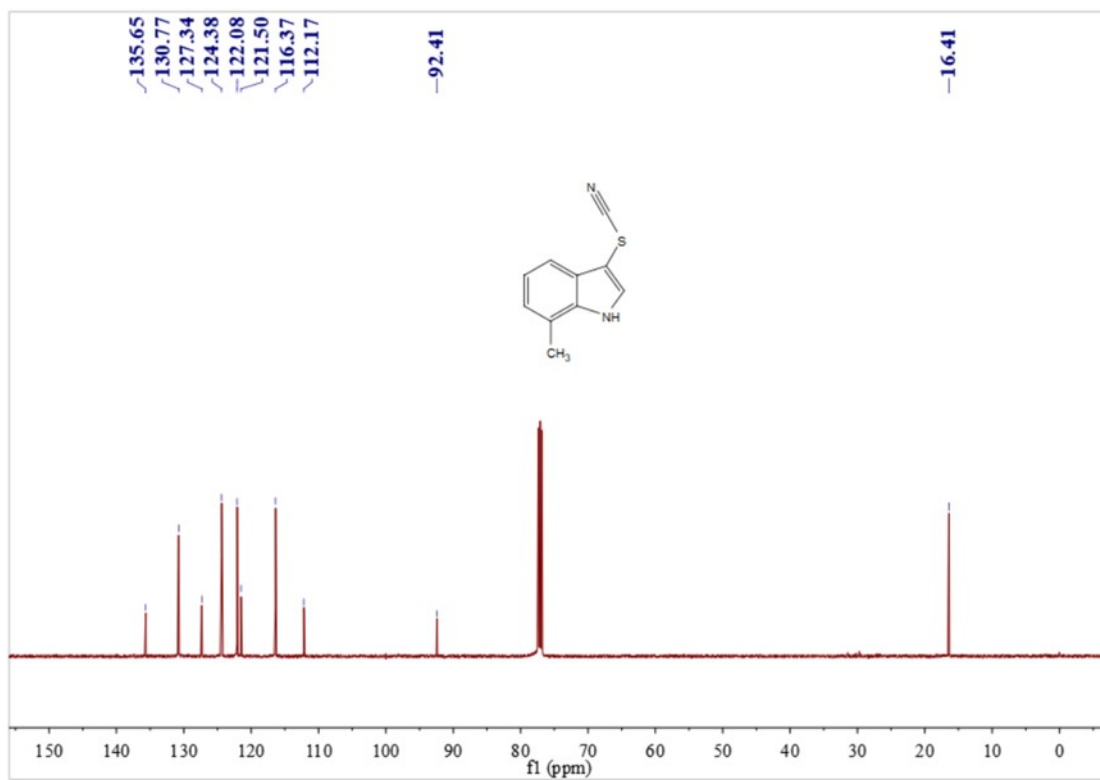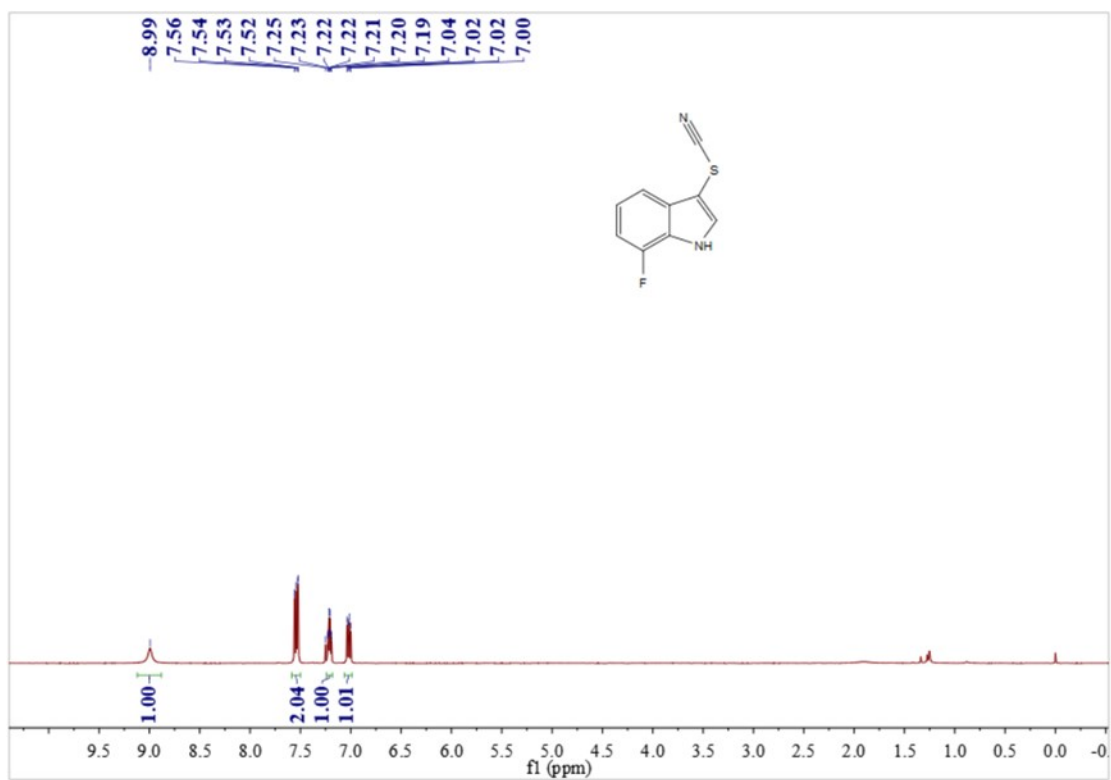

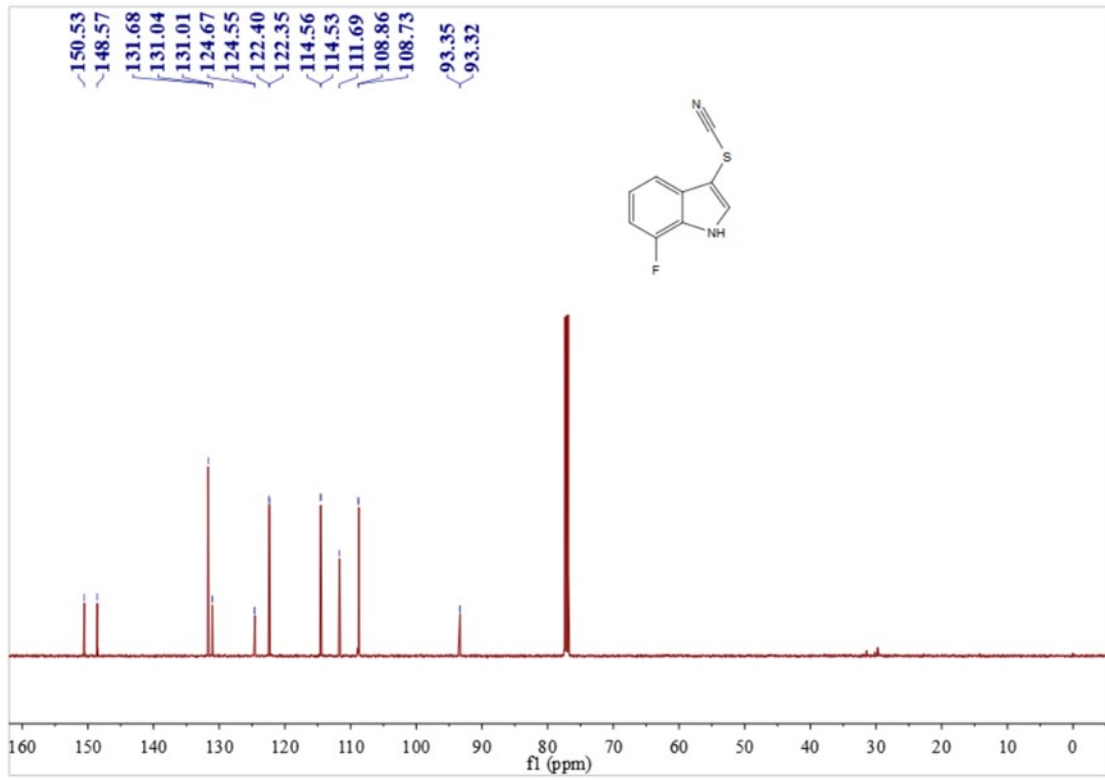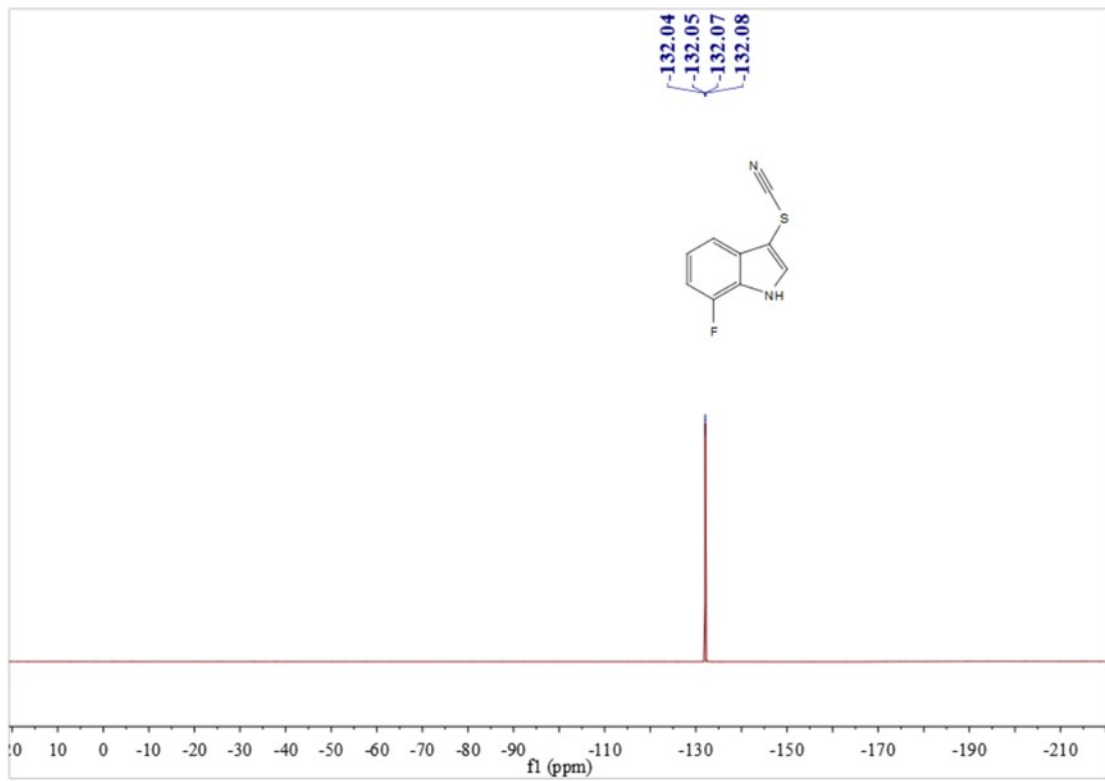

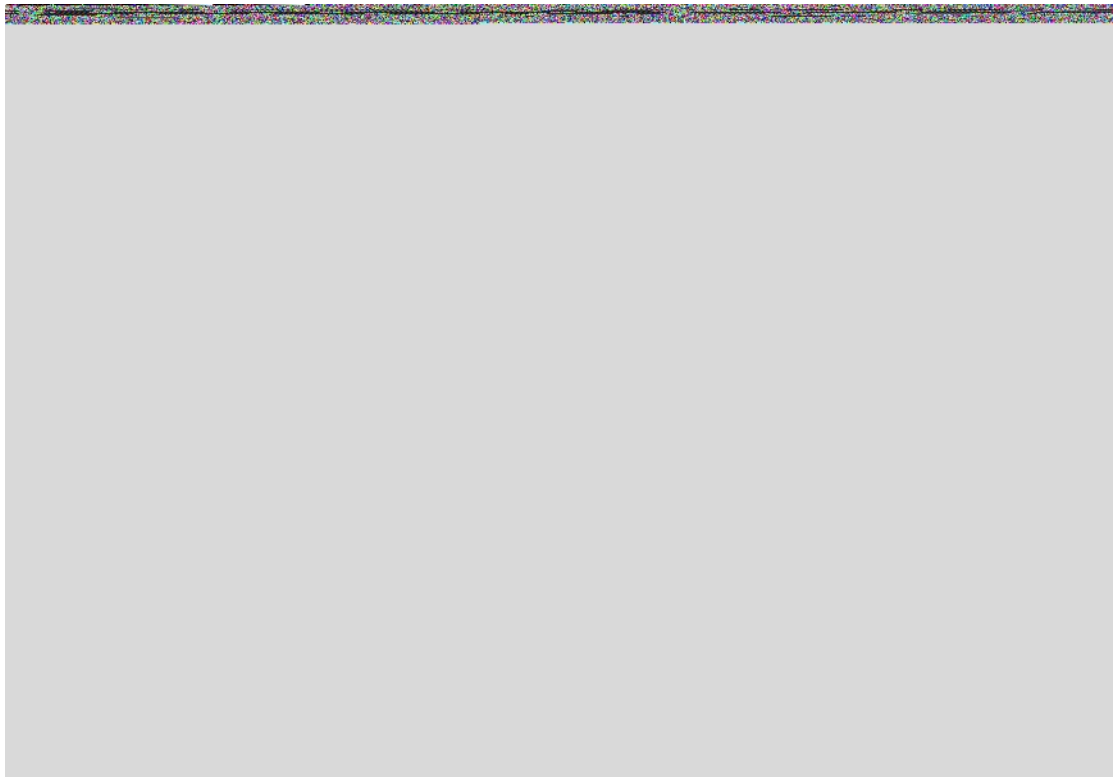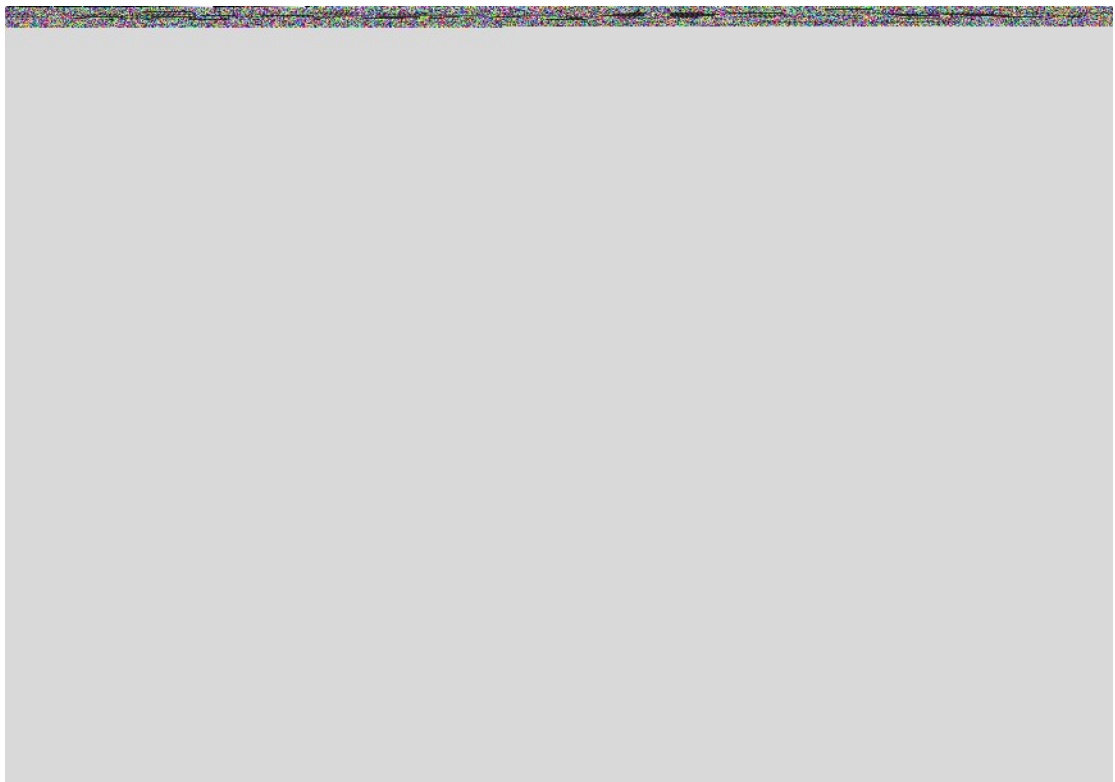



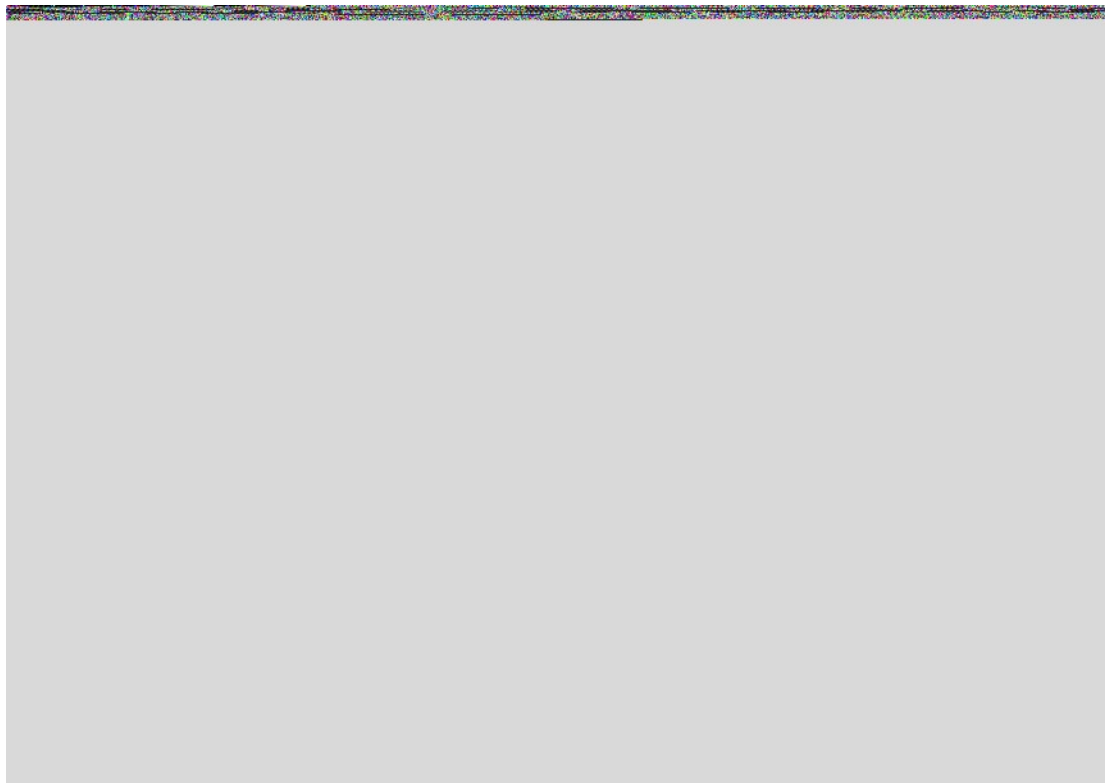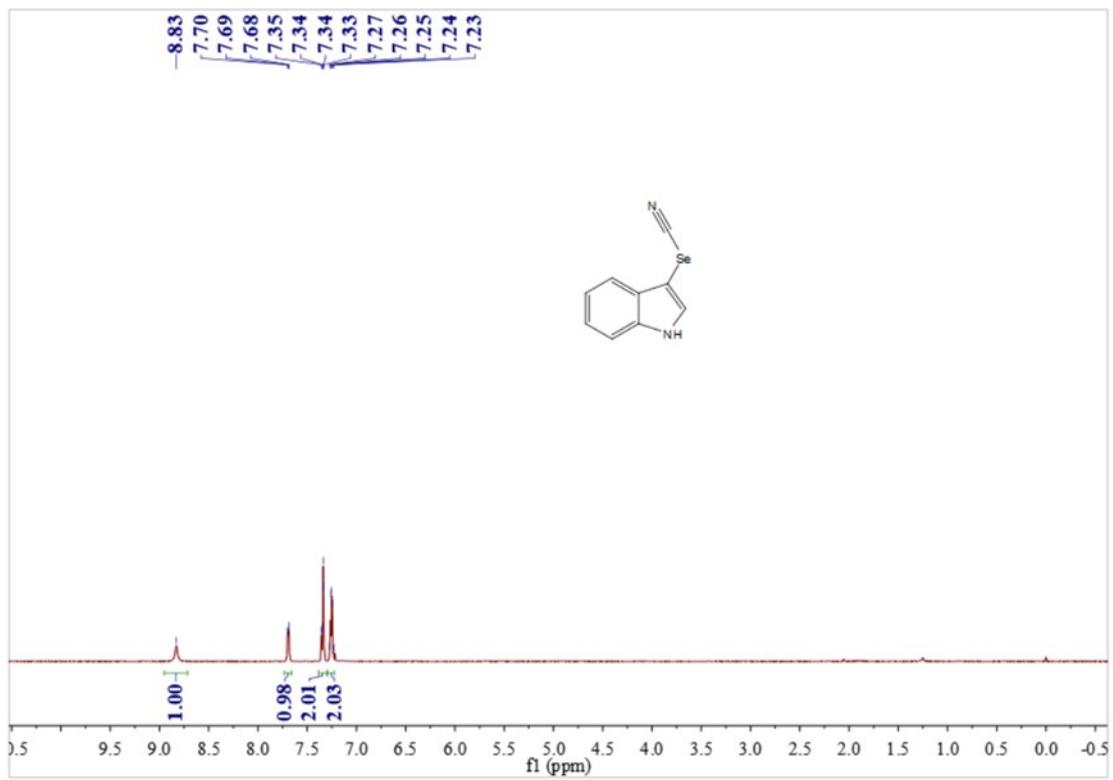

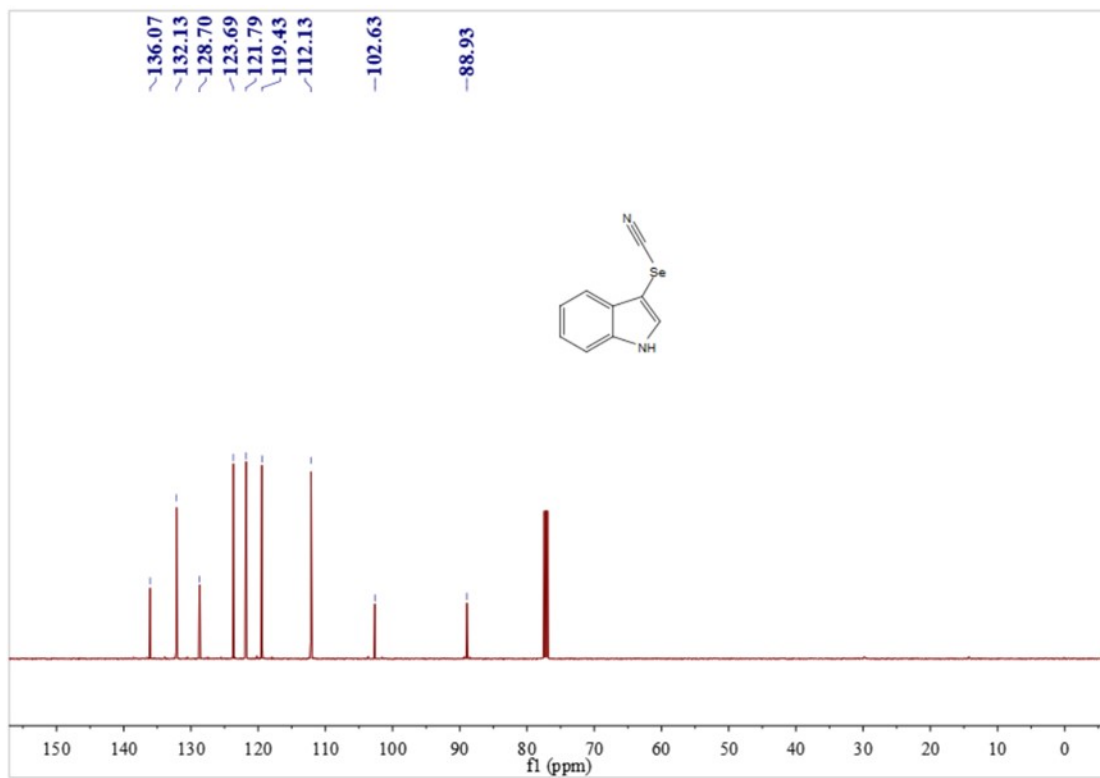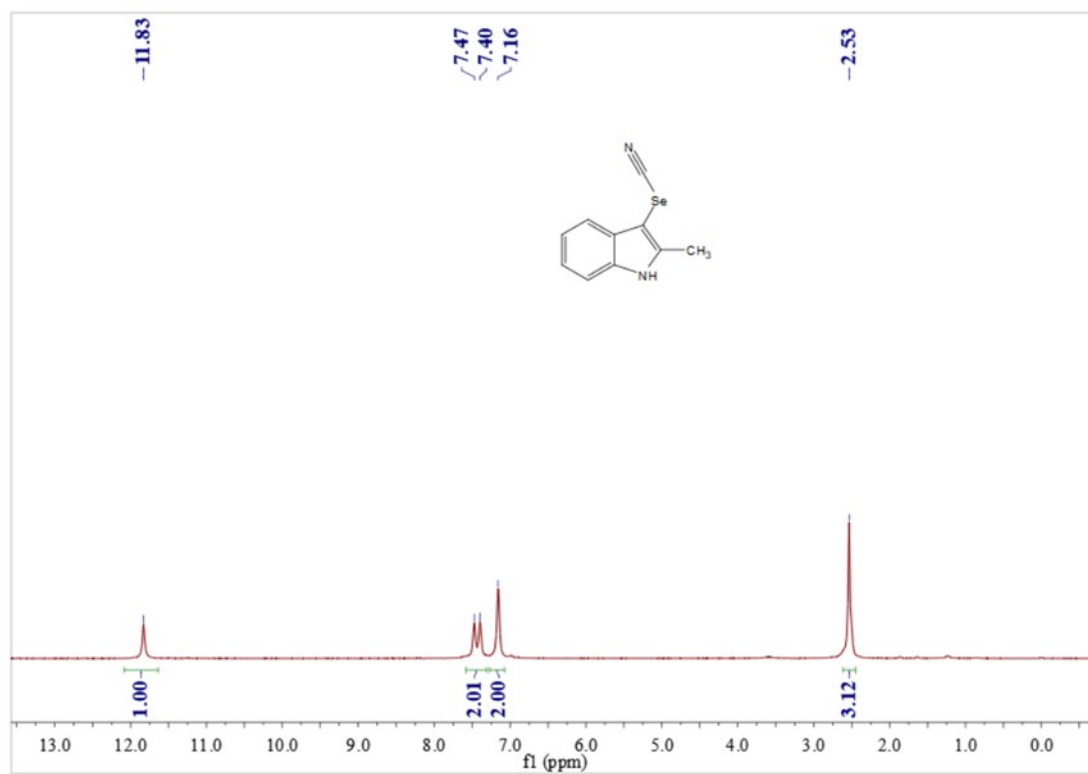

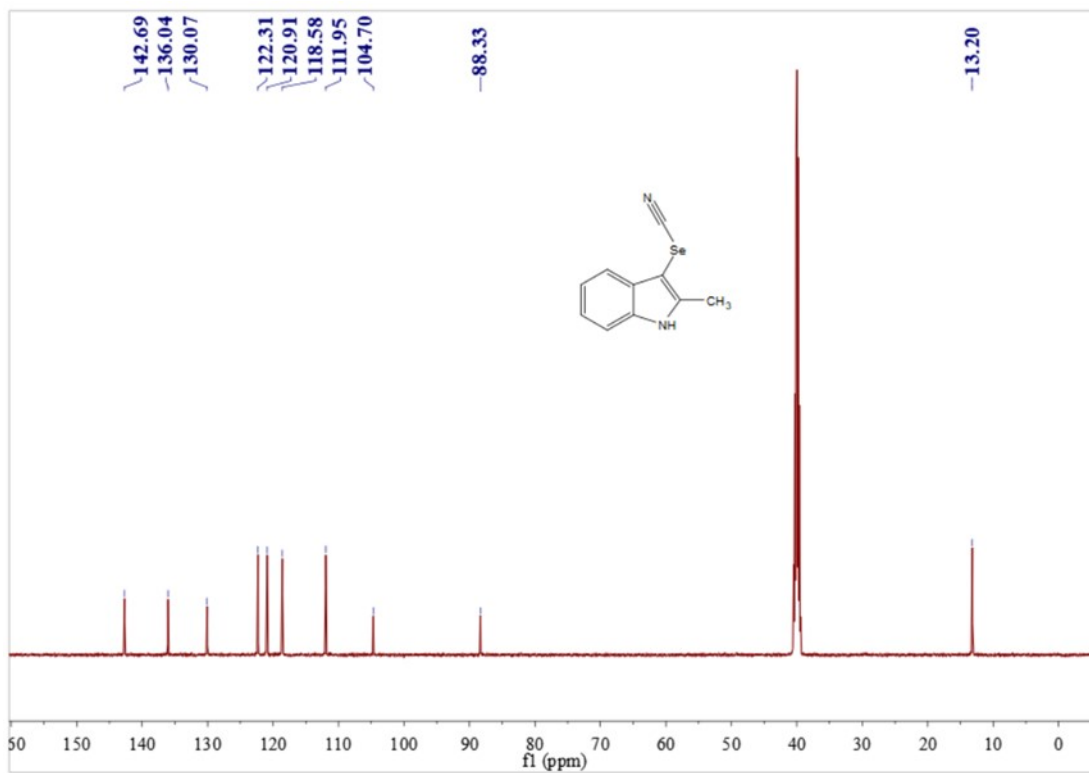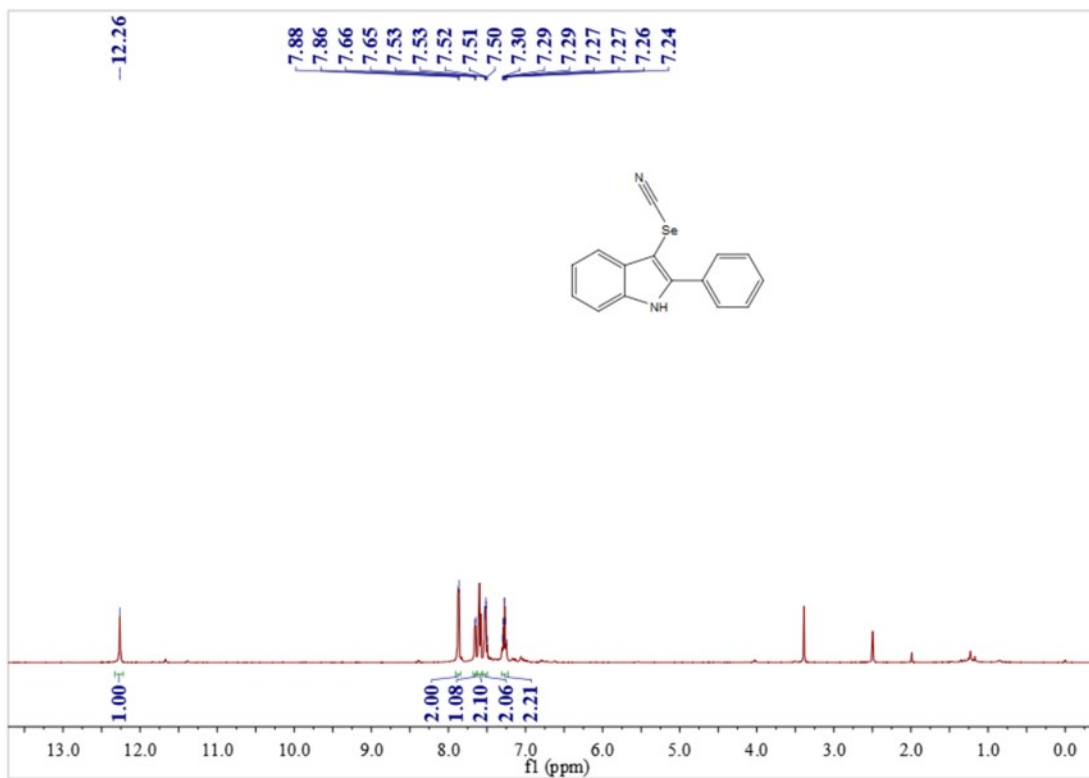

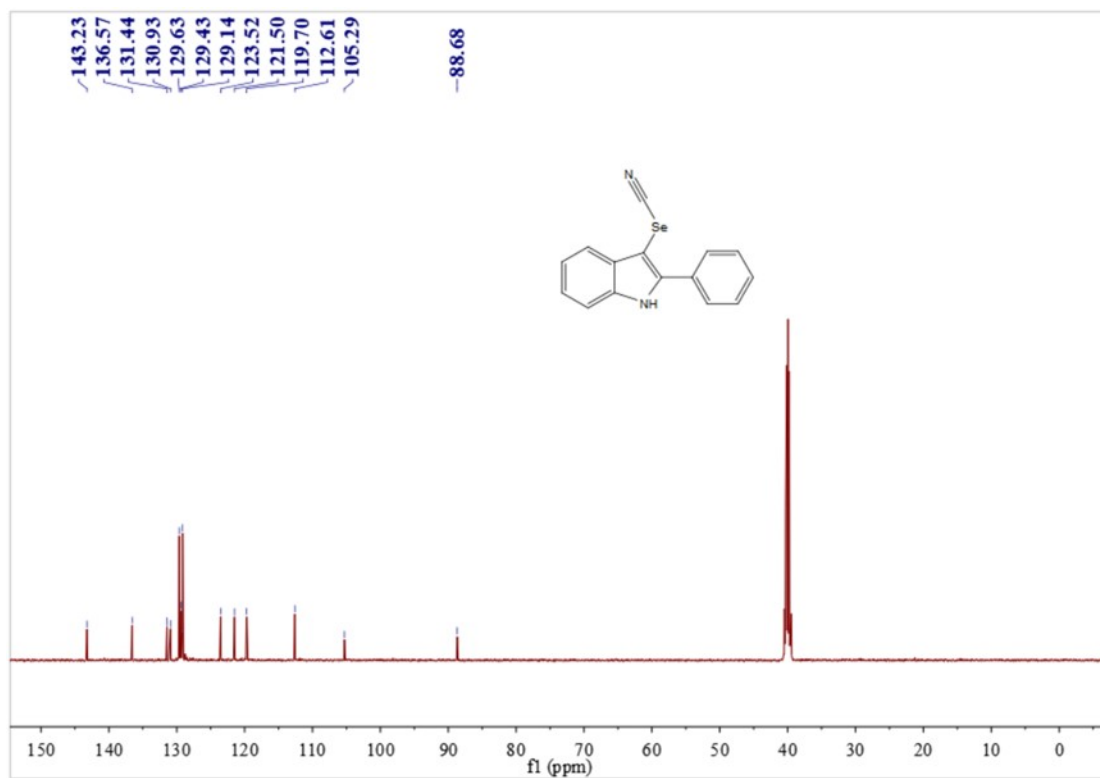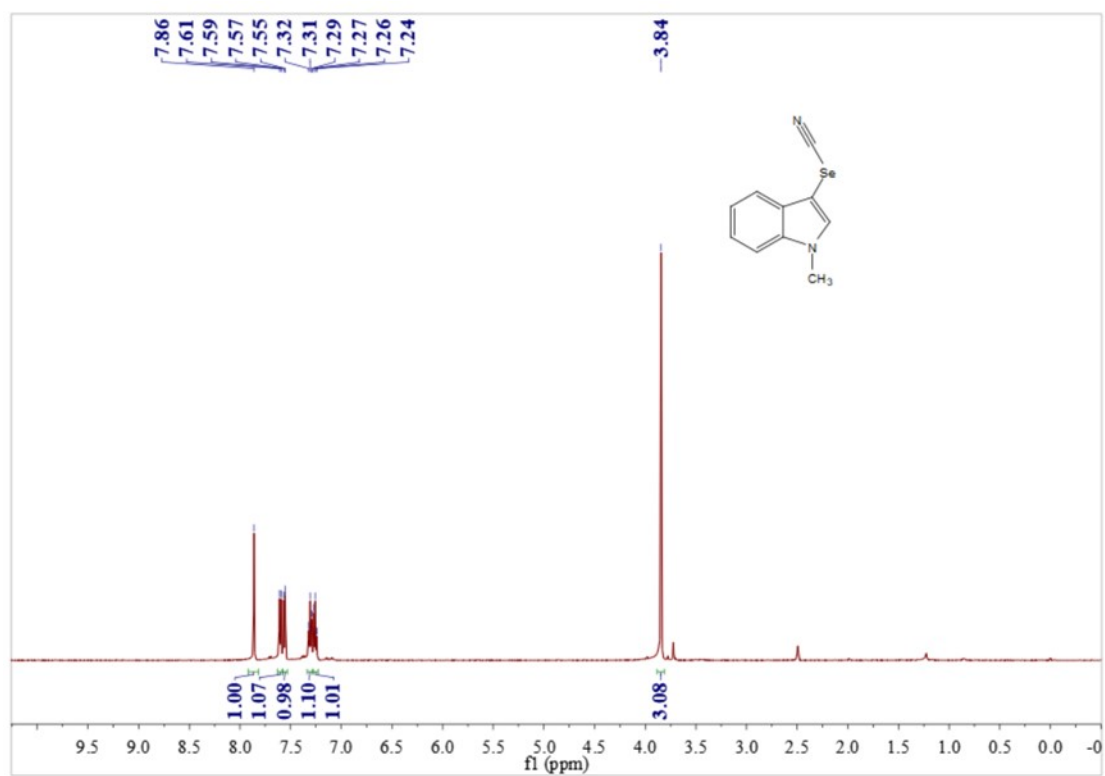

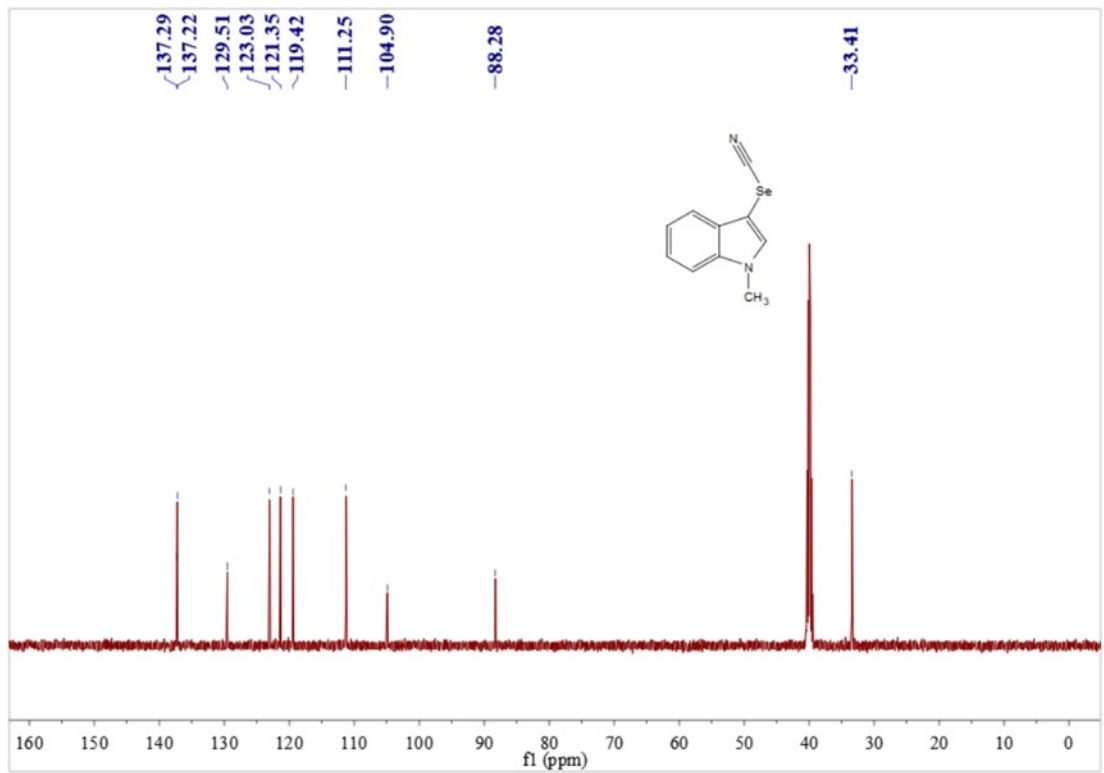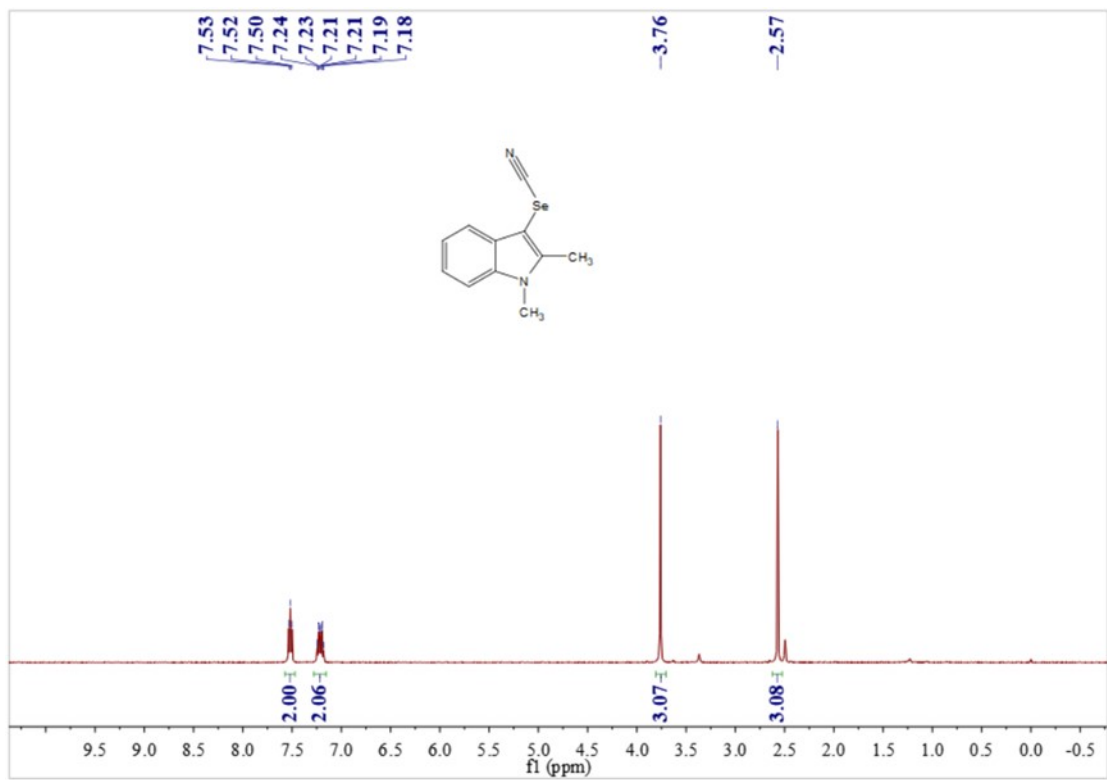

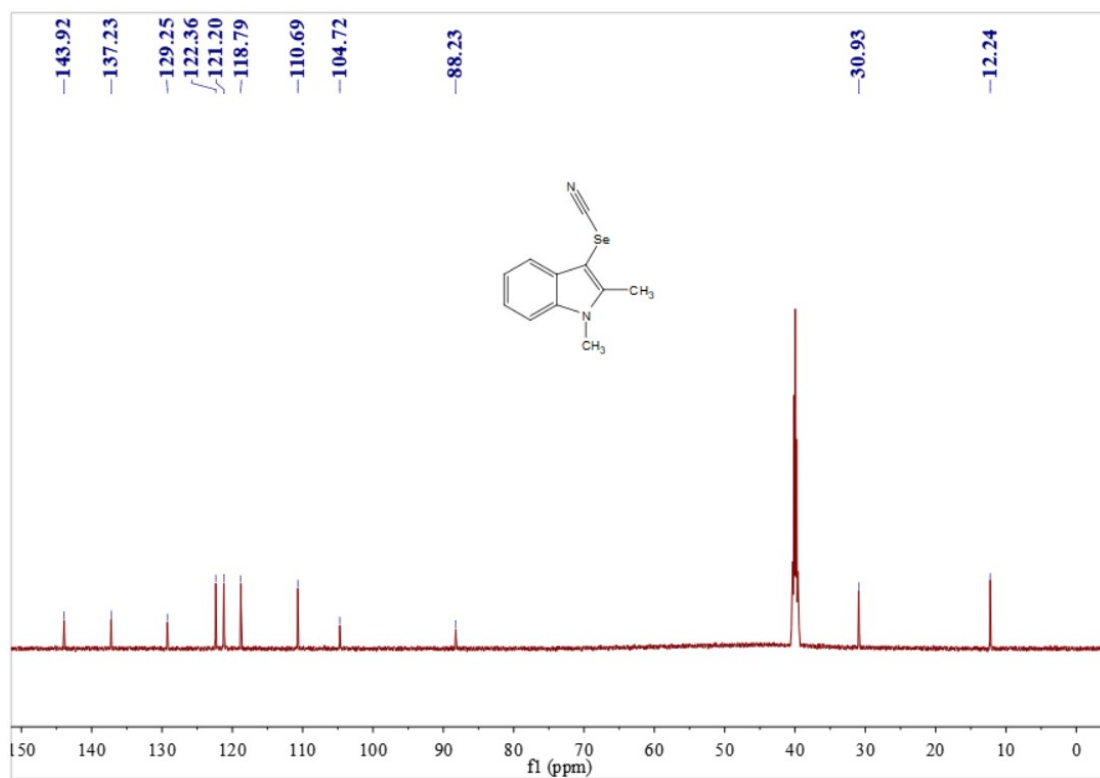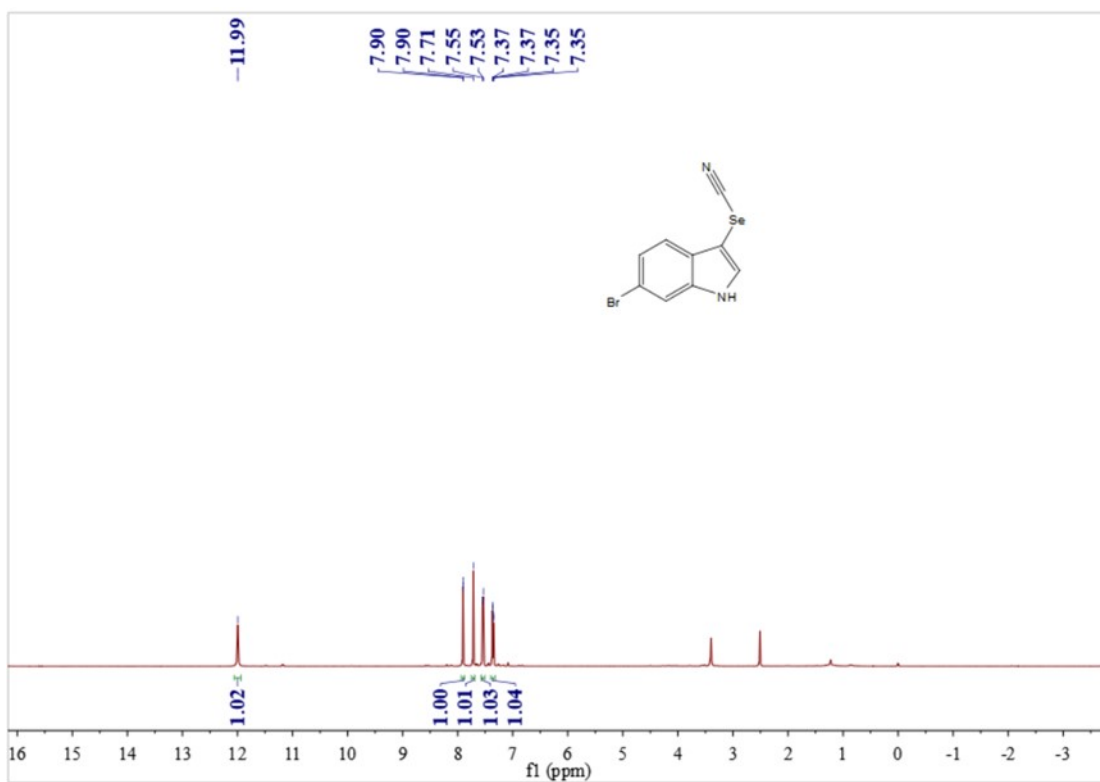

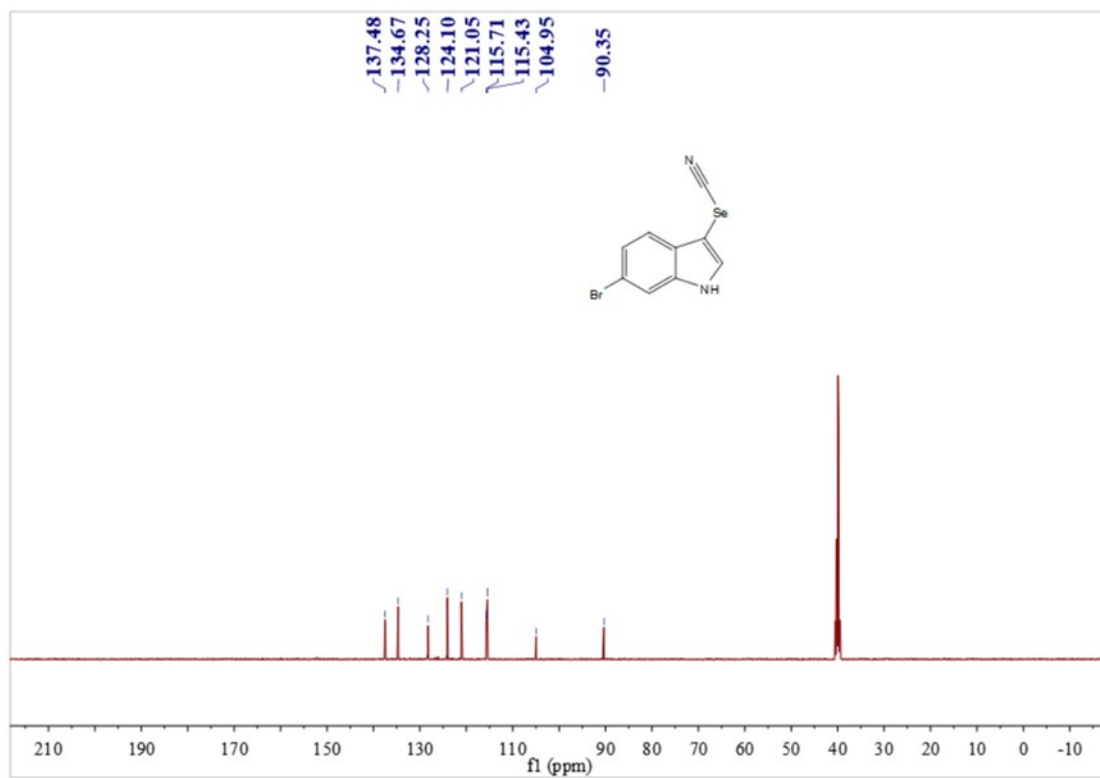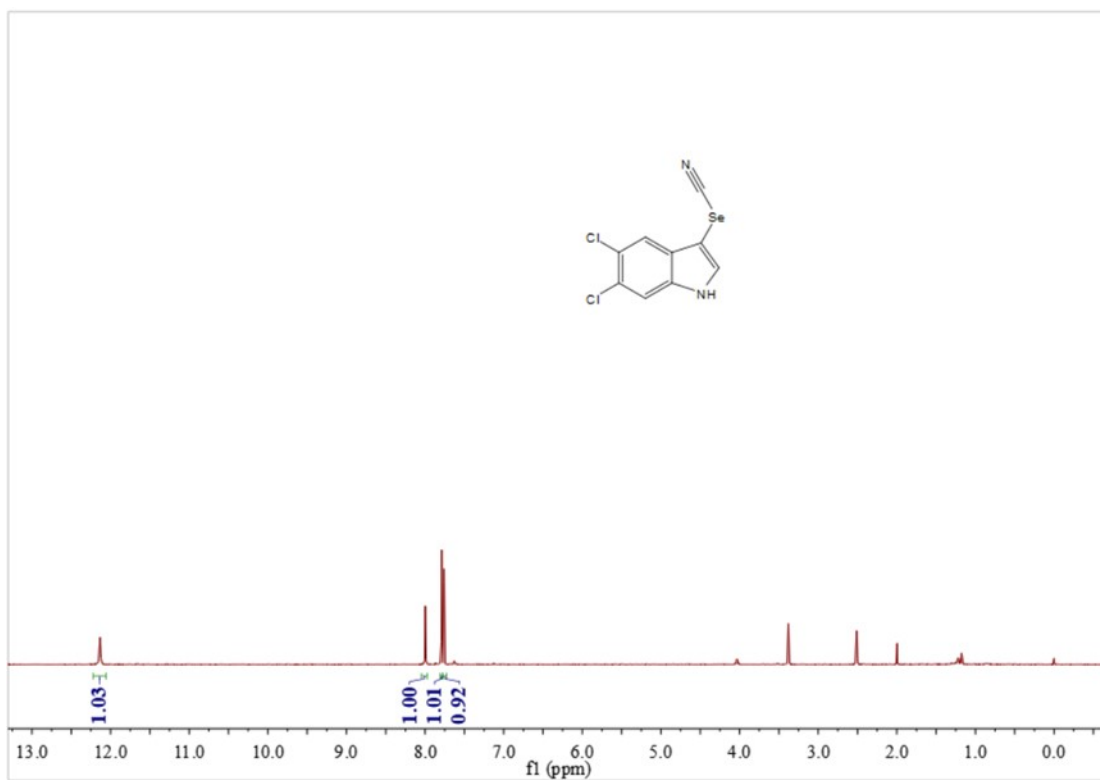

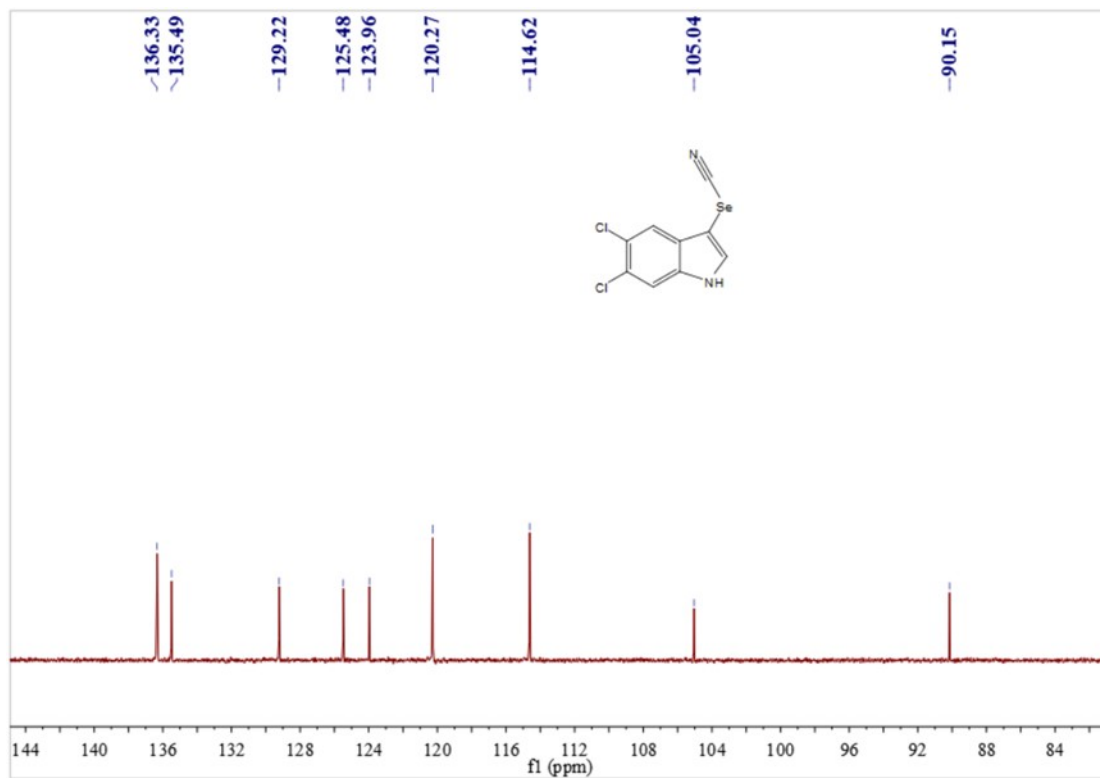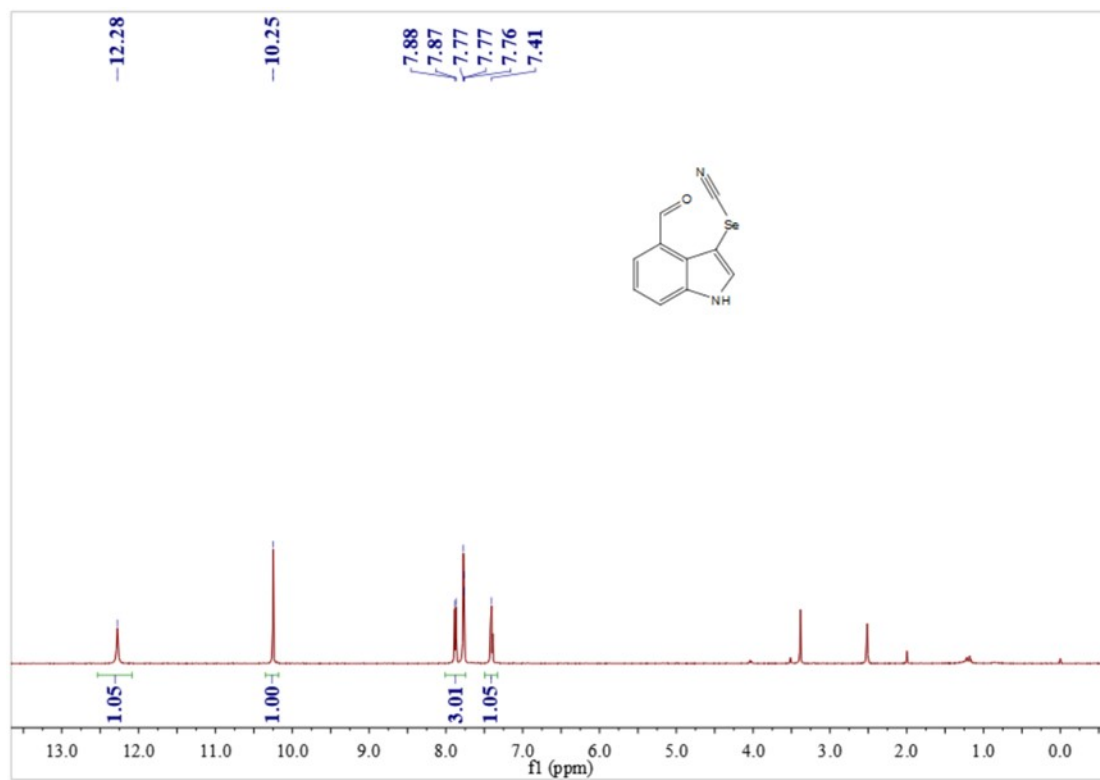



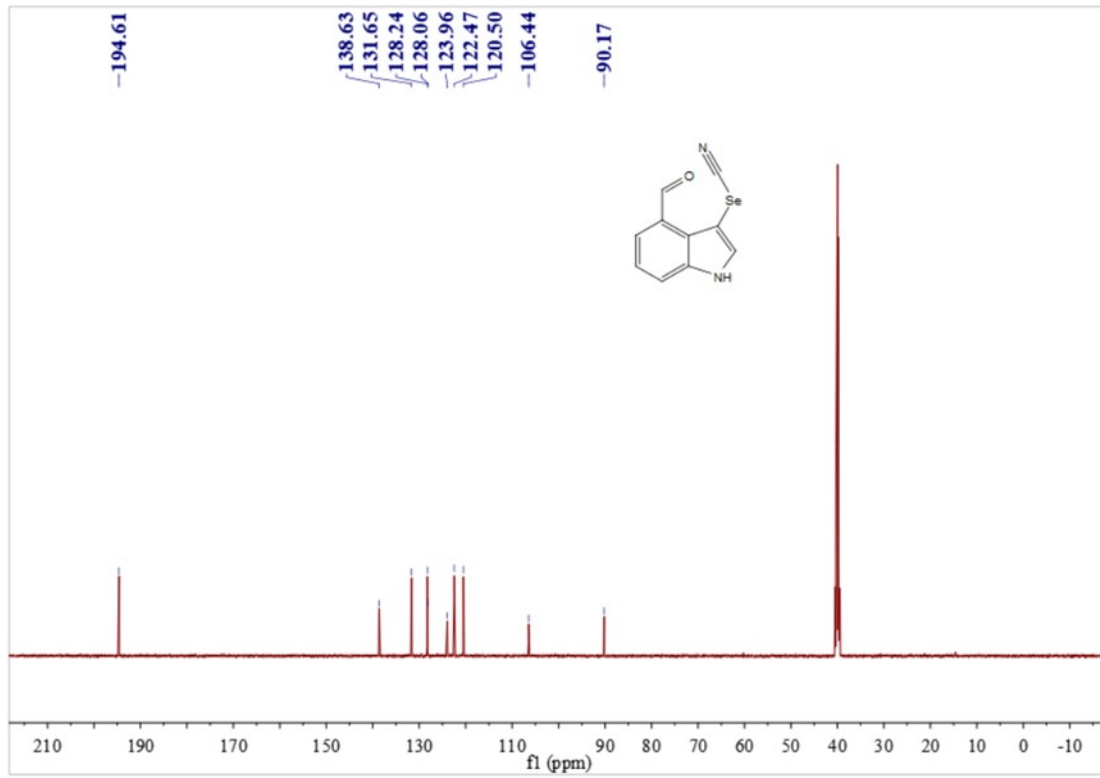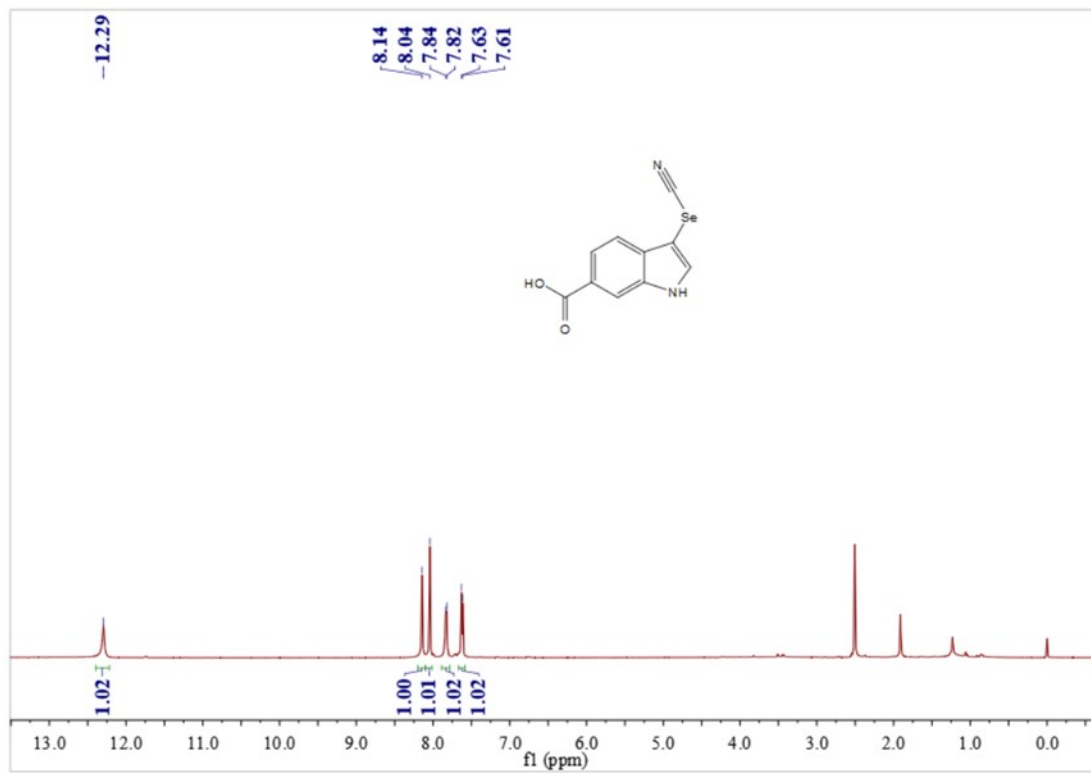

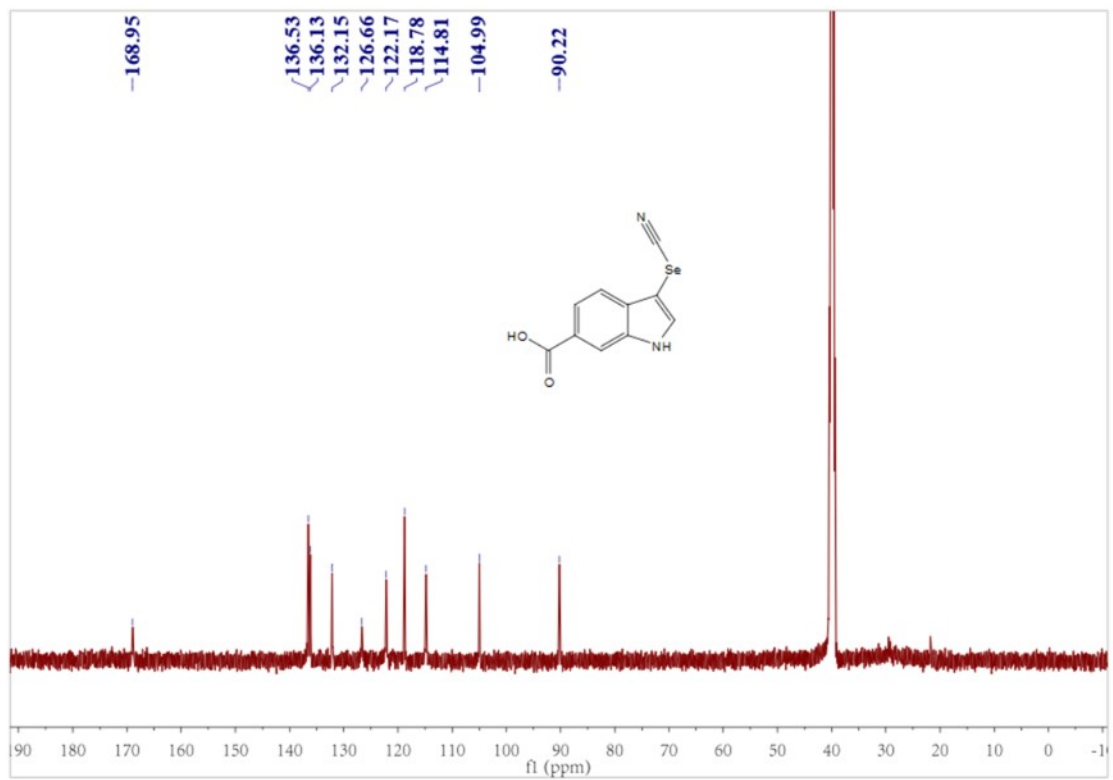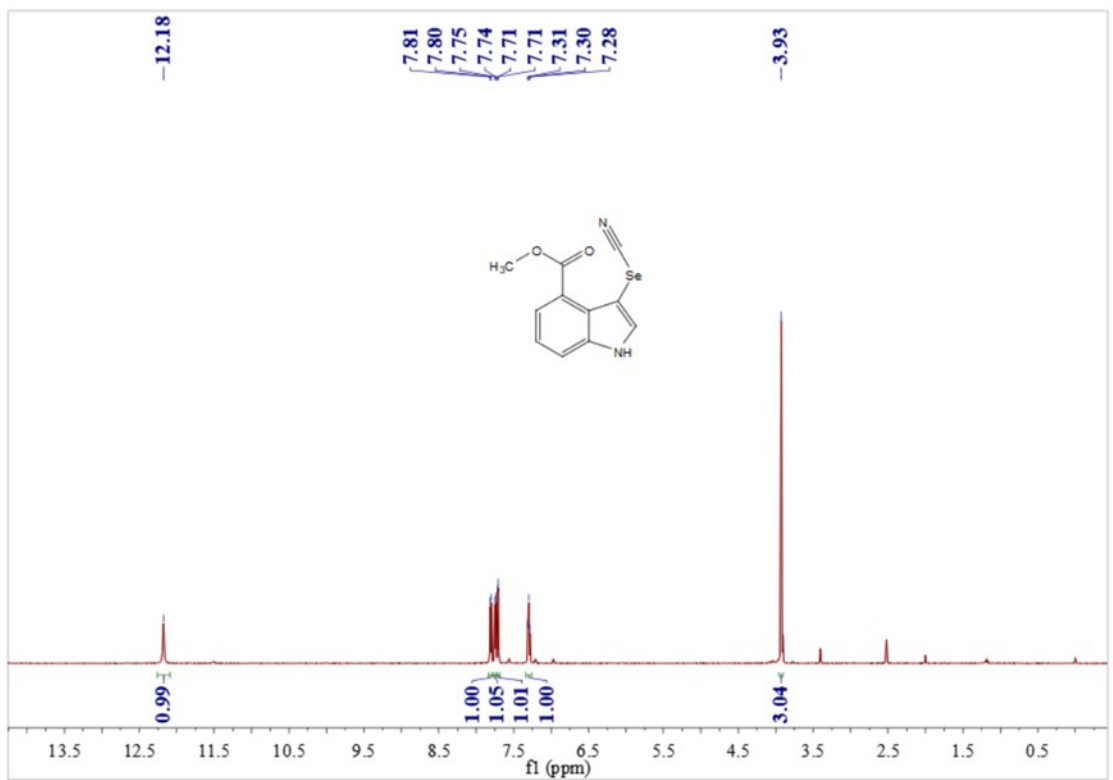

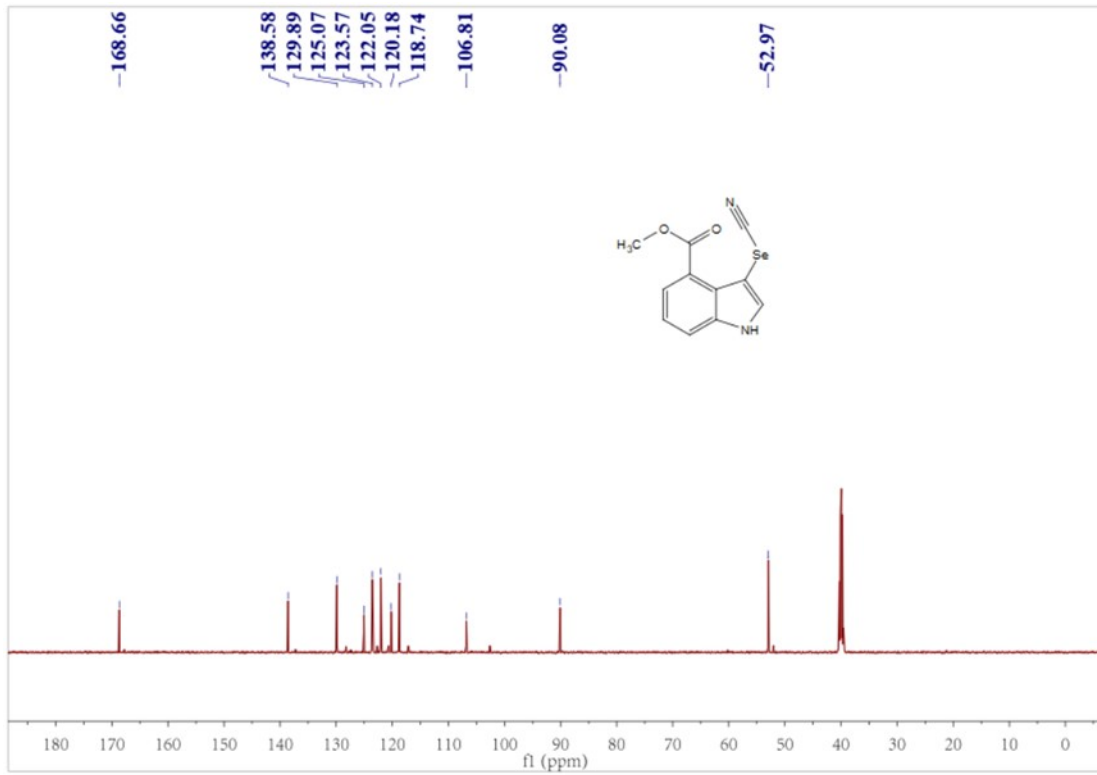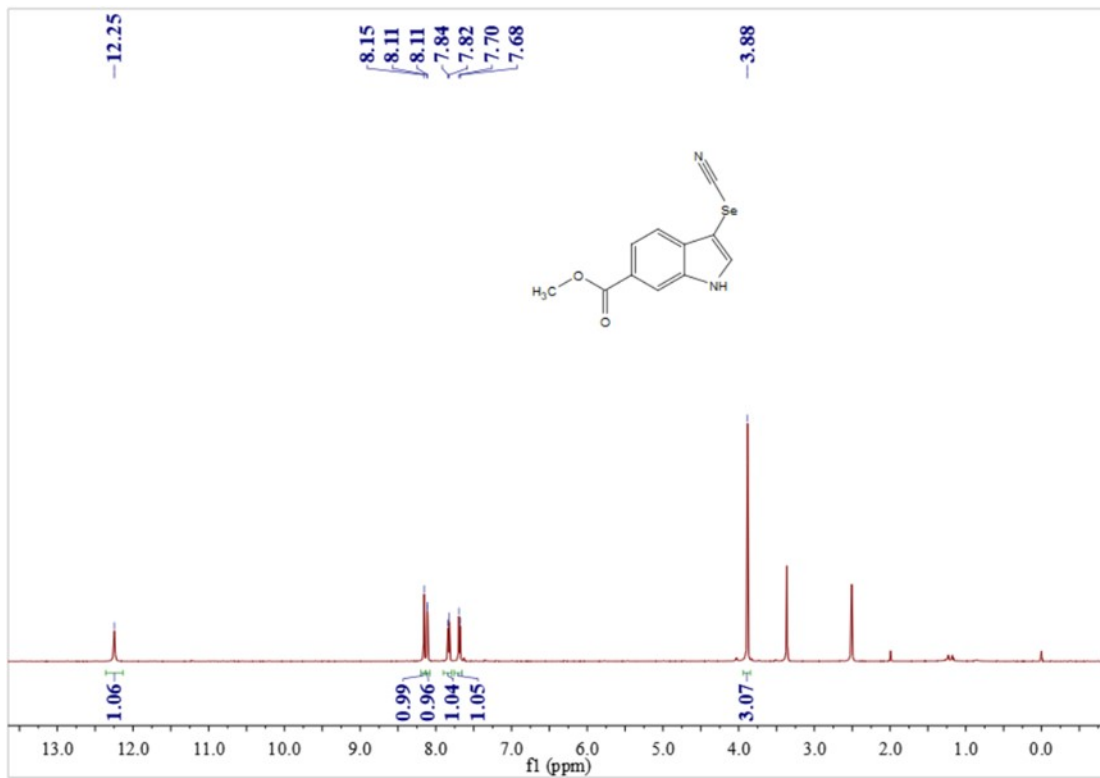

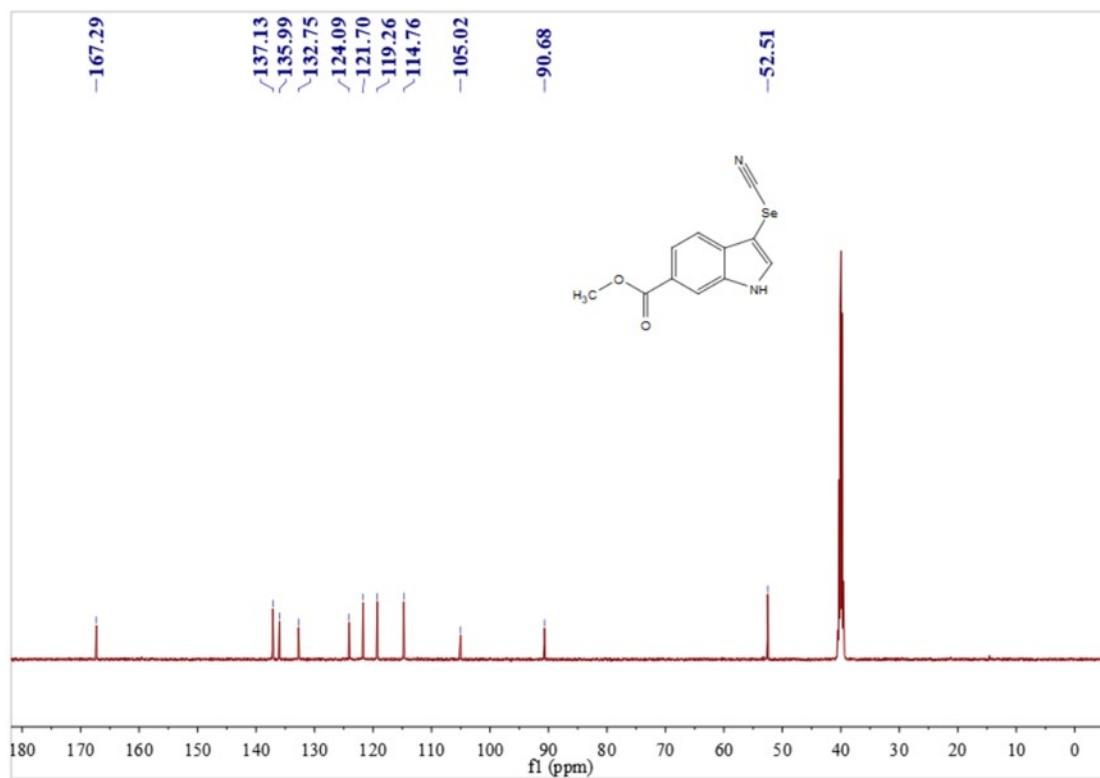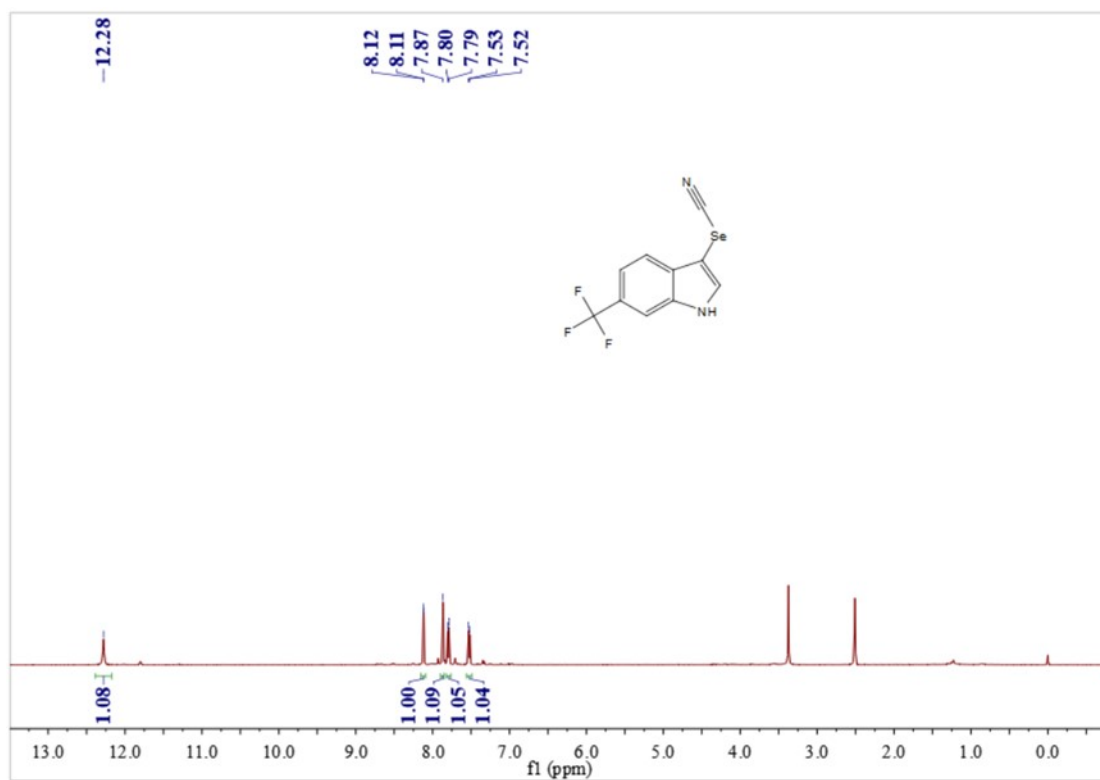

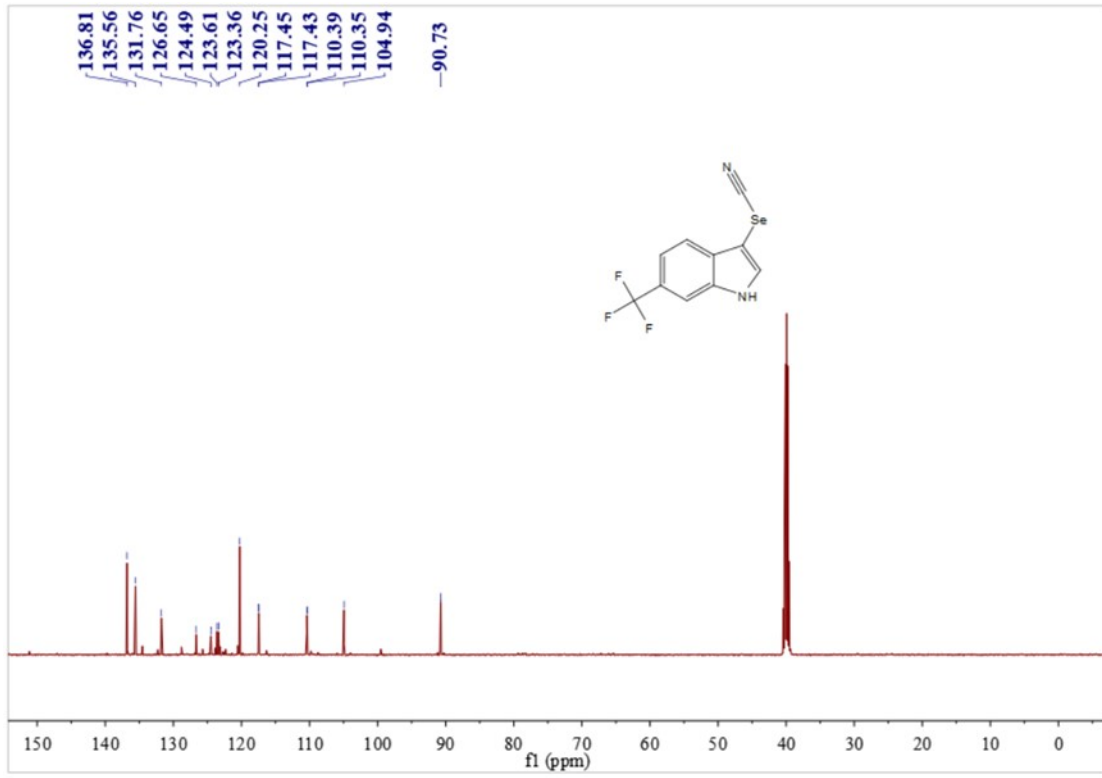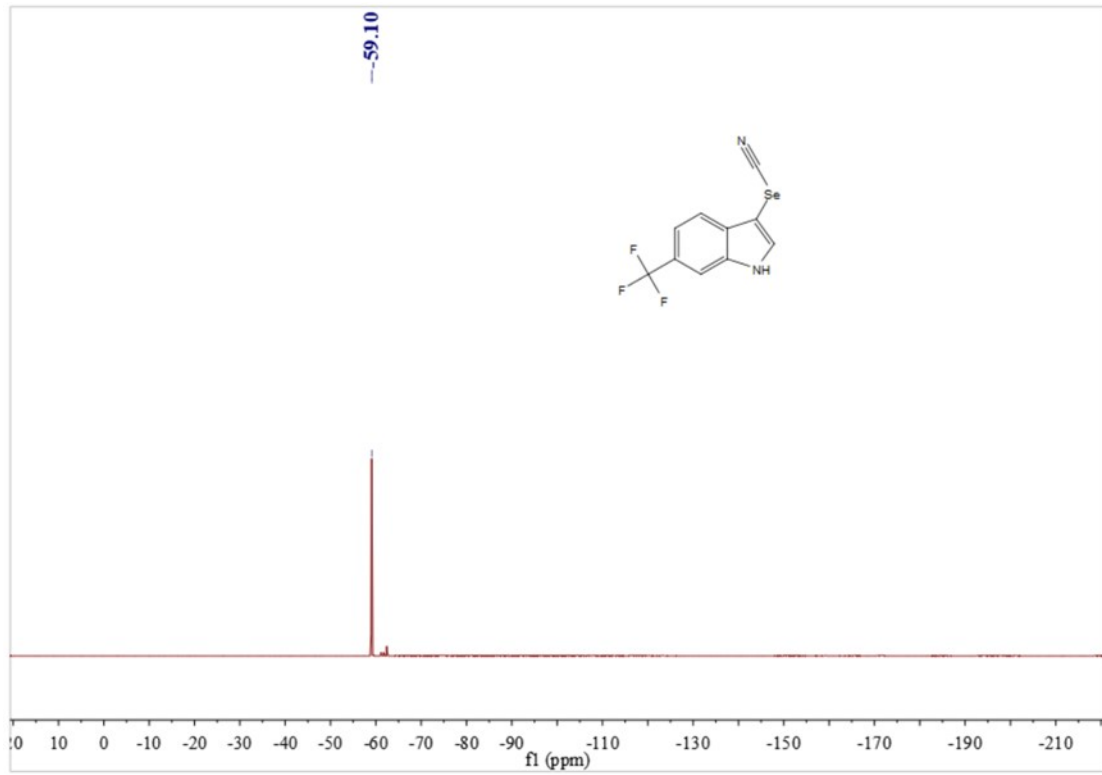

## 5. References

- 1 Y. Wang, H. Huang, Z. Zhang, C. Wang, Y. Yang, Q. Li and D. Xu, *Appl. Catal. B-Environ.*, 2021, **282**, 119570.
- 2 W. Fan, Q. Yang, F. Xu and P. Li, *J. Org. Chem.*, 2014, **79**, 10588-10592.
- 3 D. Zhu, H. Wen, Q. Wu, J. Li, D. Young, Y. Wang and H. Li, *Tetrahedron*, 2023, **135**, 133322.
- 4 Y. Wang, Y. Zhang, C. Zhou, Y. Jiang, Y. Xu, X. Zeng and G. Liu, *Org. Biomol. Chem.*, 2022, **20**, 5463-5469.
- 5 A. Meier, S. V. Badalov, T. Biktagirov, W. G. Schmidt and R. Wilhelm, *Chem. Eur. J.*, 2023, **29**, e202203541.
- 6 X. Zhang, C. Wang, H. Jiang and L. Sun, *RSC Adv.*, 2018, **8**, 22042-22045.
- 7 Q. Xie, Y. Yang, W. Zhang, Z. Gao, X. Li, J. Tang, C. Pan and G. Yu, *Chem. Sci.*, 2021, **12**, 5631-5637.
- 8 I. D. Lemir, G. Oksdath-Mansilla, W. D. Castro-Godoy, L. C. Schmidt and J. E. Argüello, *Photochem. Photobiol. Sci.*, 2022, **21**, 849-861.
